# Supplementary material for: New Chemistry of Chiral 1,3-Dioxolan-4-Ones
Source: MDPI journal article supplement (doi:10.3390/molecules28093845), 2023-05-01

# New Chemistry of Chiral 1,3-Dioxolan-4-ones

R. Alan Aitken\*, Lynn A. Power and Alexandra M. Z. Slawin

EaStCHEM School of Chemistry, University of St Andrews, North Haugh, St Andrews, Fife, KY16 9ST, UK.

## Supplementary Material

<sup>1</sup>H NMR, DEPTQ <sup>13</sup>C NMR, IR and HRMS spectra of **14**

<sup>1</sup>H NMR and DEPTQ <sup>13</sup>C NMR spectra of **6a**

<sup>1</sup>H NMR, DEPTQ <sup>13</sup>C NMR, IR and HRMS spectra of **6b**

<sup>1</sup>H NMR, DEPTQ <sup>13</sup>C NMR and IR spectra of **7a**

<sup>1</sup>H NMR, DEPTQ <sup>13</sup>C NMR and IR spectra of **7b**

<sup>1</sup>H NMR and DEPTQ <sup>13</sup>C NMR spectra of **16**

<sup>1</sup>H NMR, DEPTQ <sup>13</sup>C NMR and IR spectra of **17**

IR and HRMS spectra of **18**

<sup>1</sup>H NMR spectrum of **19**

<sup>1</sup>H NMR, DEPTQ <sup>13</sup>C NMR and HRMS spectra of **20**

<sup>1</sup>H NMR, DEPTQ <sup>13</sup>C NMR, IR and HRMS spectra of **21**

<sup>1</sup>H NMR, DEPTQ <sup>13</sup>C NMR and IR spectra of **22a**

<sup>1</sup>H NMR, DEPTQ <sup>13</sup>C NMR and IR spectra of **24**

<sup>1</sup>H NMR and DEPTQ <sup>13</sup>C NMR spectra of **25**

<sup>1</sup>H NMR and DEPTQ <sup>13</sup>C NMR spectra of **27**

<sup>1</sup>H NMR, DEPTQ <sup>13</sup>C NMR and HRMS spectra of **28**

<sup>1</sup>H NMR, <sup>13</sup>C NMR and IR spectra of **29a**

<sup>1</sup>H NMR and IR spectra of **29b**

## Figure

S1, S2, S3, S4

S5, S6

S7, S8, S9, S10

S11, S12, S13

S14, S15, S16

S17, S18

S19, S20, S21

S22, S23

S24

S25, S26, S27

S28, S29, S30, S31

S32, S33, S34

S35, S36, S37

S38, S39

S40, S41

S42, S43, S44

S45, S46, S47

S48, S49

Figure S1. 300 MHz DEPTQ  $^1\text{H}$  NMR spectrum of **14**

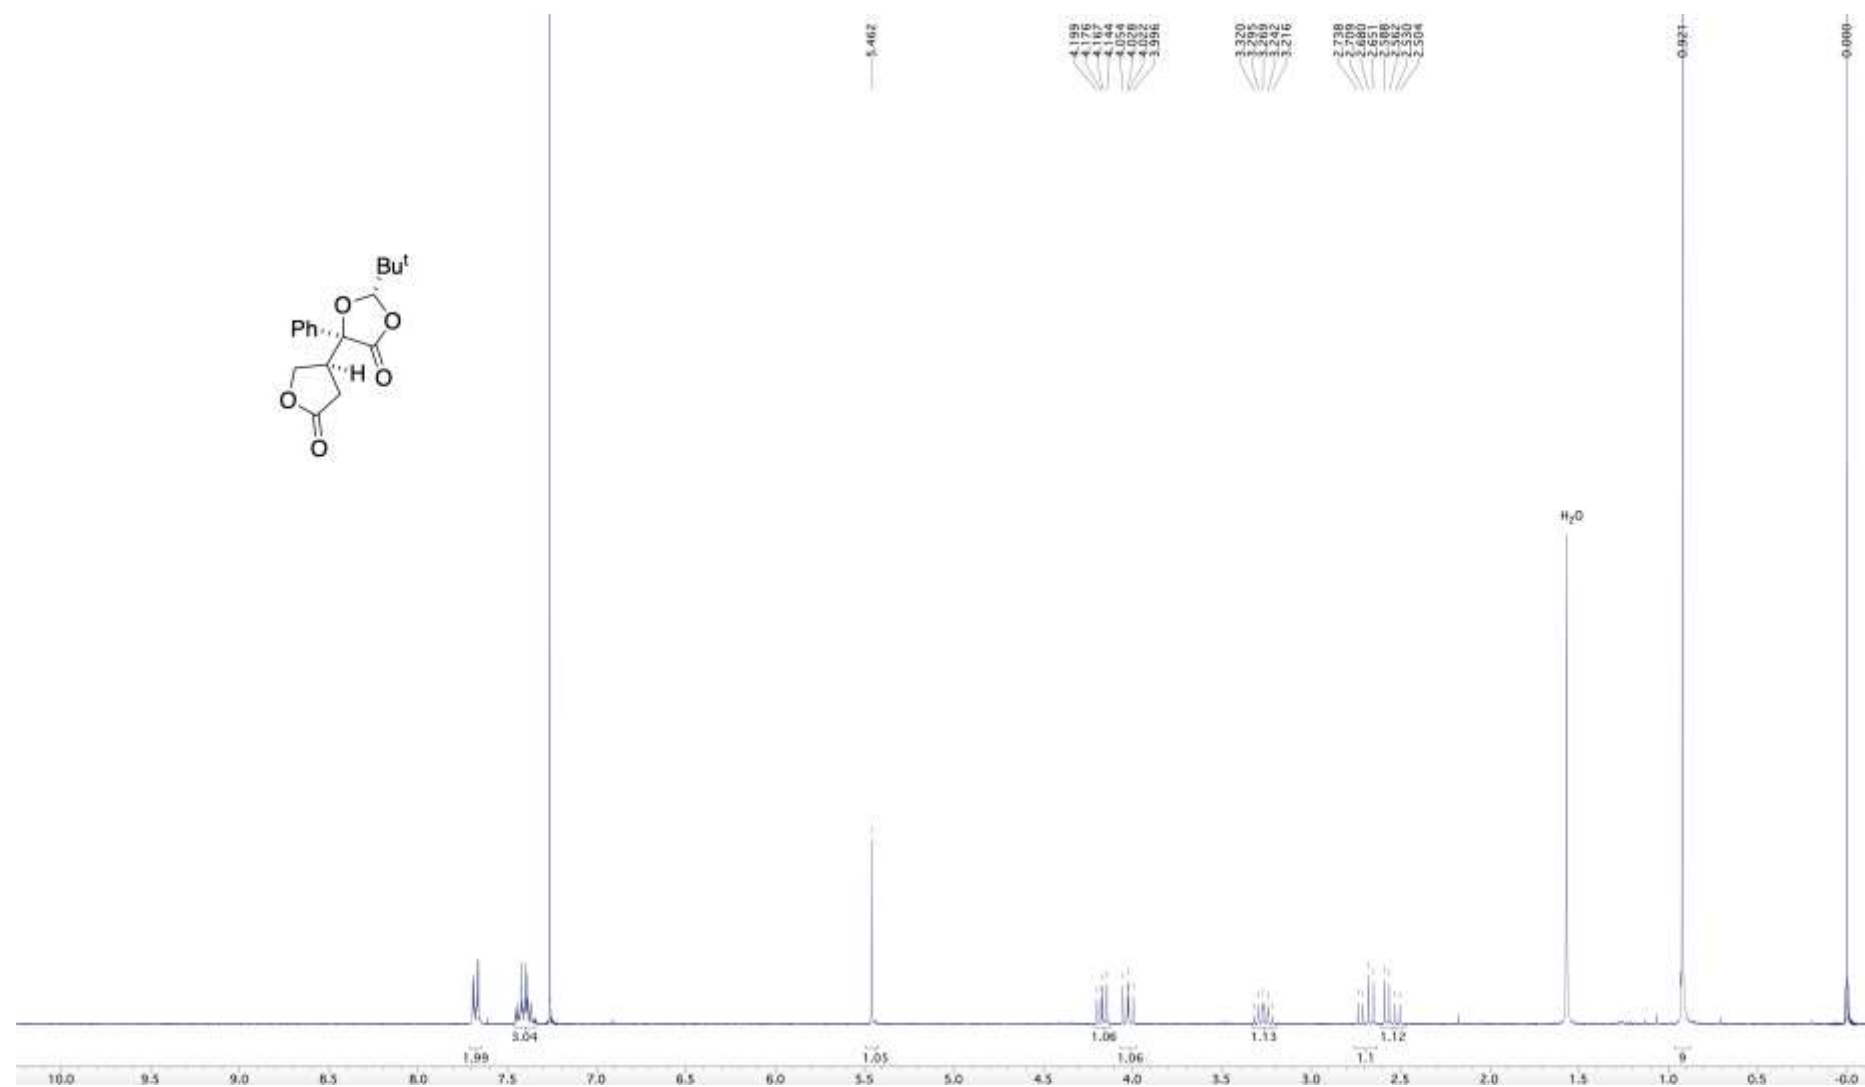

Figure S2. 75 MHz DEPTQ  $^{13}\text{C}$  NMR spectrum of **14**

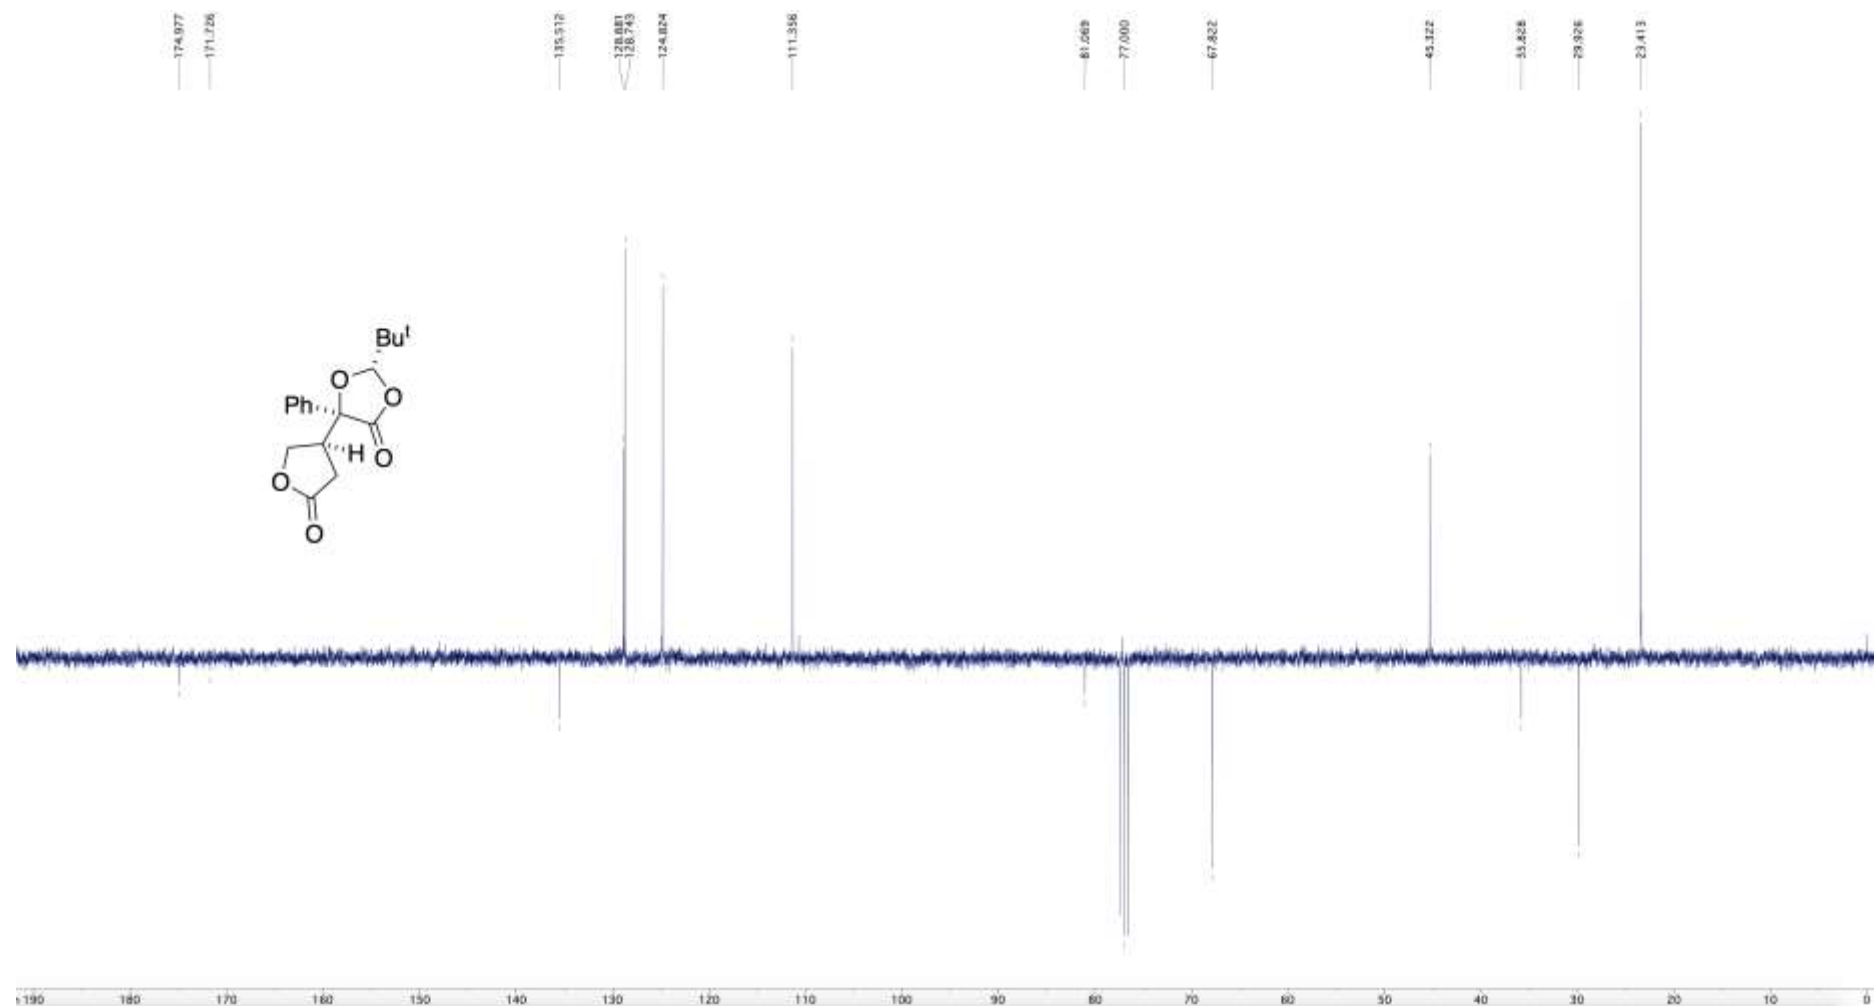

Figure S3. IR spectrum of **14**

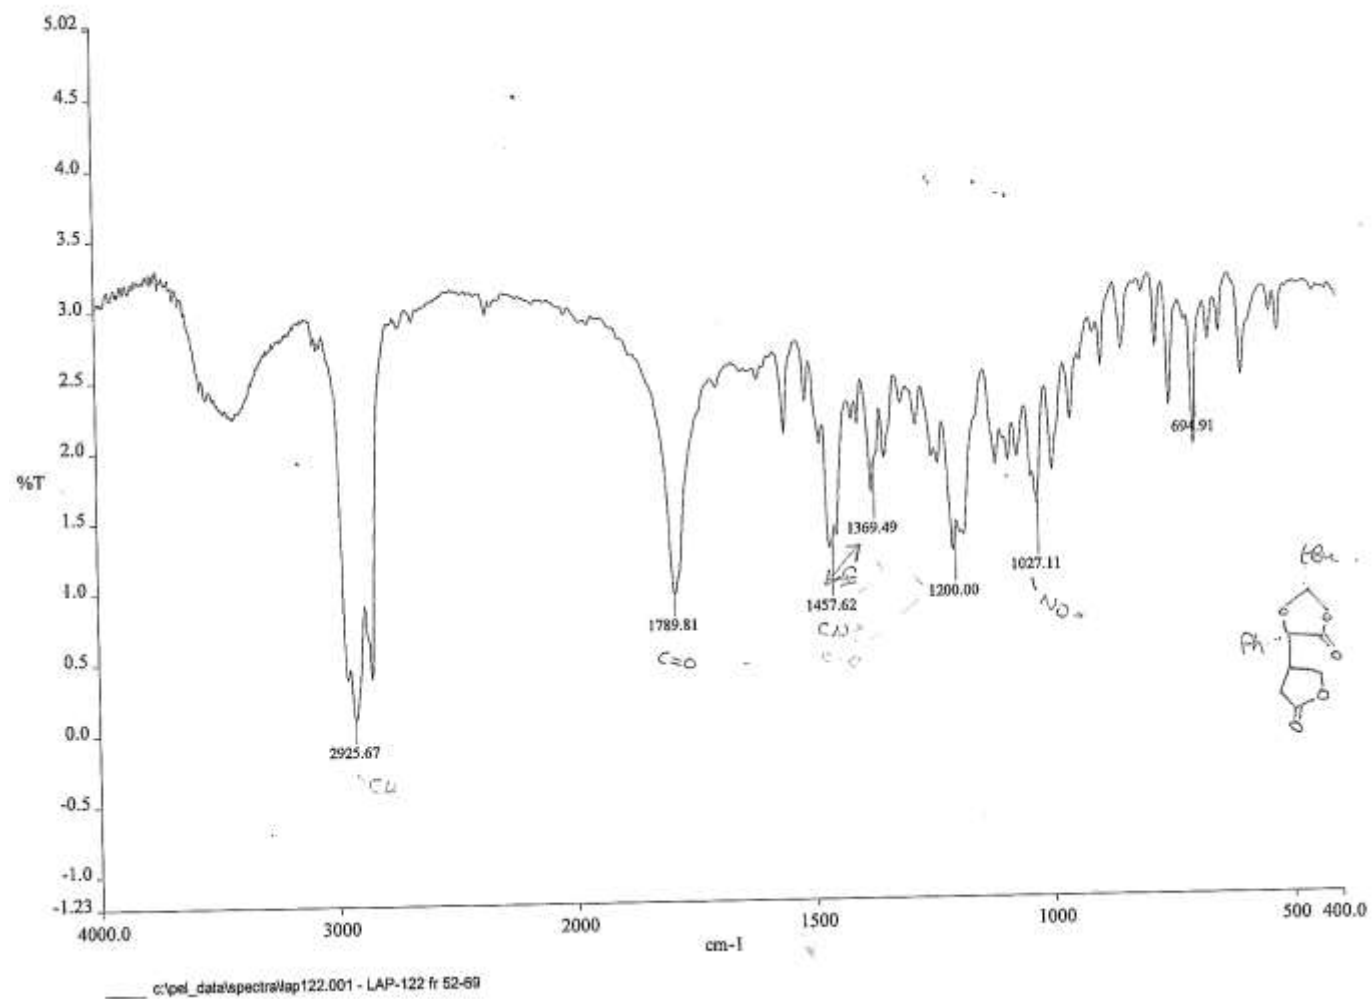

Figure S4. HRMS of **14**

## Elemental Composition Report

Page 1

### Single Mass Analysis

Tolerance = 20.0 PPM / DBE: min = -1.5, max = 40.0

Isotope cluster parameters: Separation = 1.0 Abundance = 1.0%

Monoisotopic Mass, Odd and Even Electron Ions

26 formula(e) evaluated with 2 results within limits (up to 8 closest results for each mass)

Lynn Power

University of St-Andrews  
School of Chemistry LCTOF

12-Sep-2007 15:03:51

LAP\_122am2 25 (0.486) AM (Cen,2, 80.00, Ar,7000.0,325.19,0.76,LS 5); Cm (25:31)

1: TOF MS ES+  
2.09e4

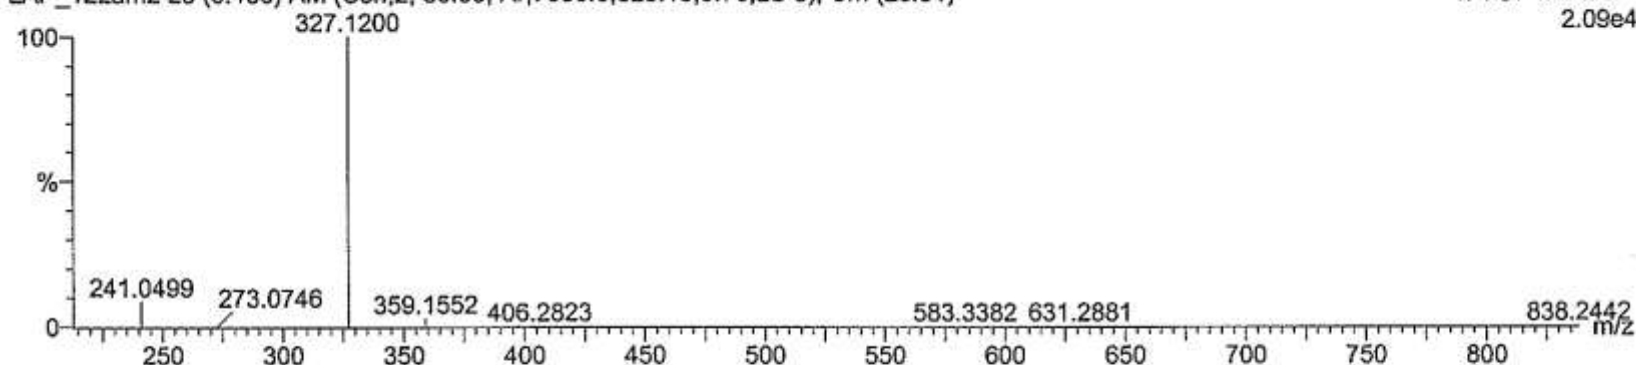

Minimum: -1.5  
Maximum: 200.0 20.0 40.0

| Mass     | Calc. Mass | mDa  | PPM  | DBE  | Score | Formula       |
|----------|------------|------|------|------|-------|---------------|
| 327.1200 | 327.1208   | -0.8 | -2.5 | 7.5  | 1     | C17 H20 O5 Na |
|          | 327.1232   | -3.2 | -9.9 | 10.5 | 2     | C19 H19 O5    |

Figure S5. 300 MHz  $^1\text{H}$  NMR spectrum of **6a**

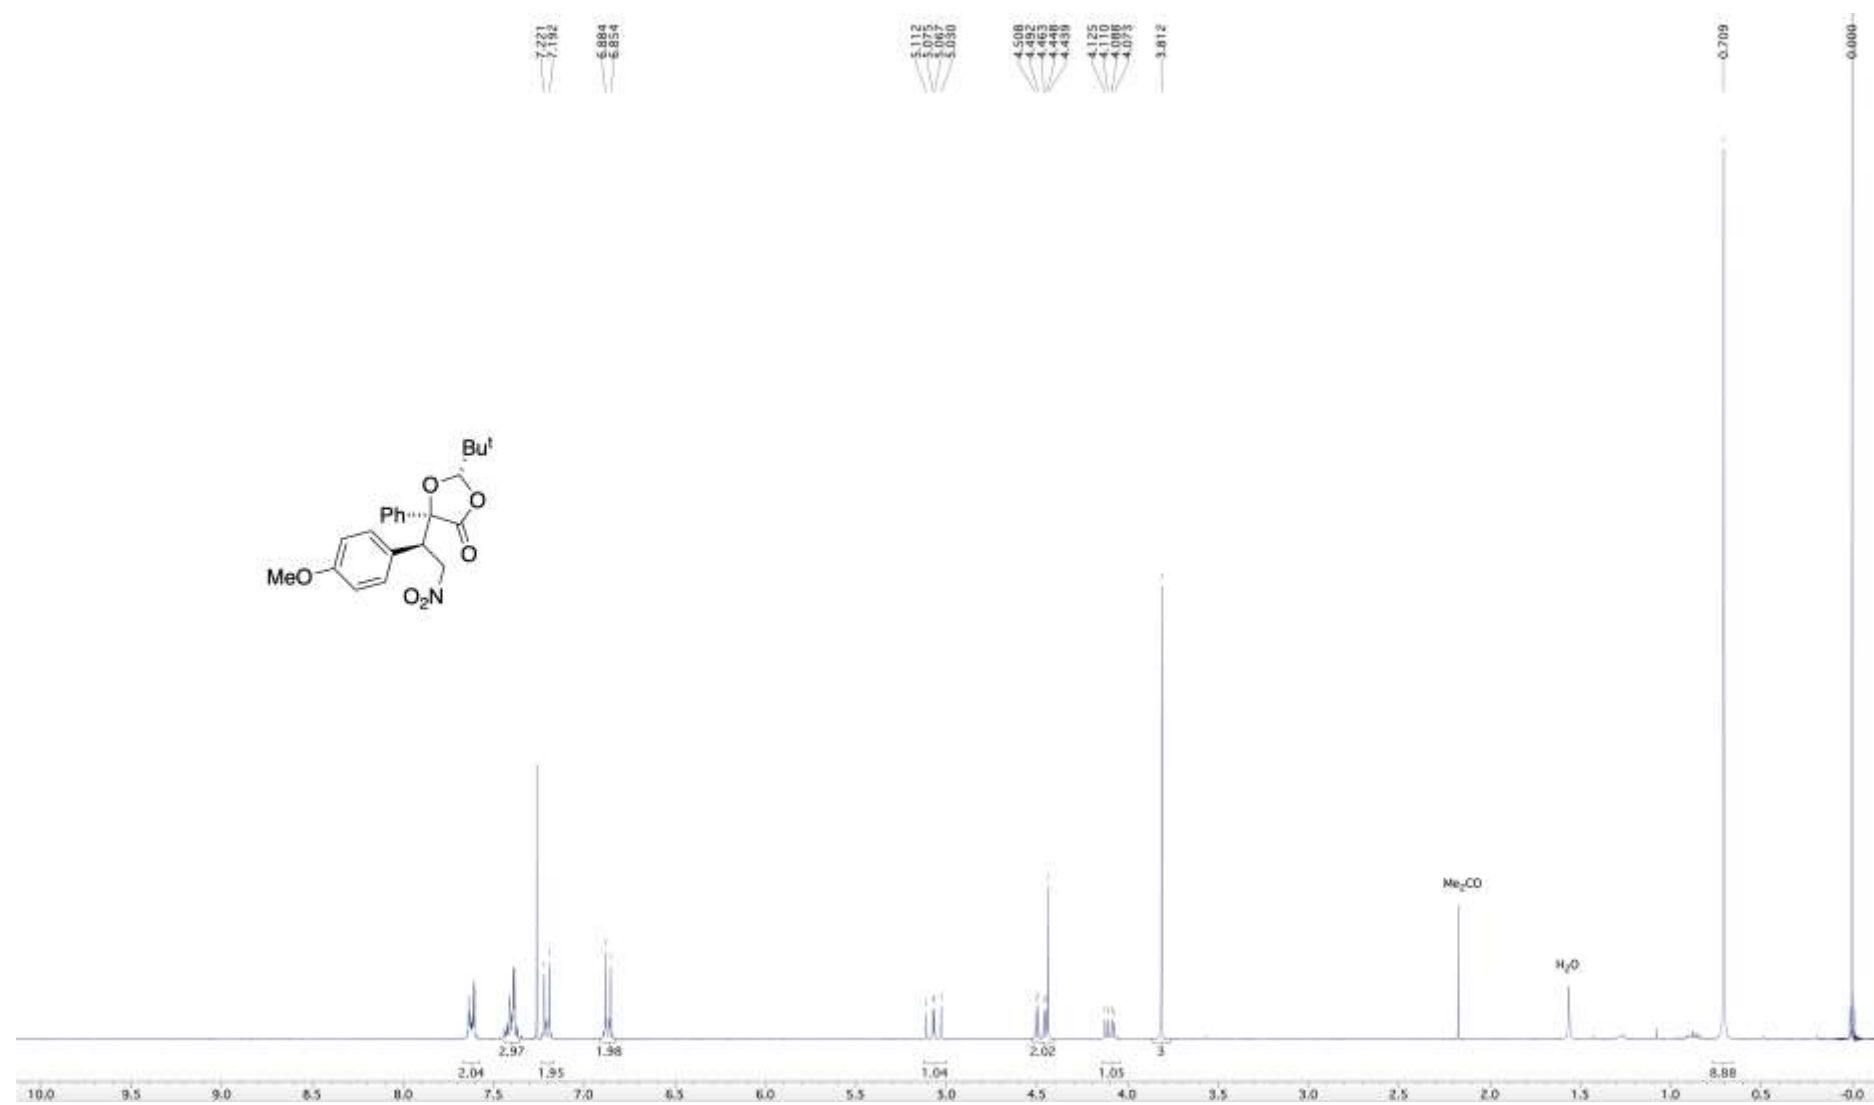

Figure S6. 75 MHz DEPTQ  $^{13}\text{C}$  NMR spectrum of **6a**

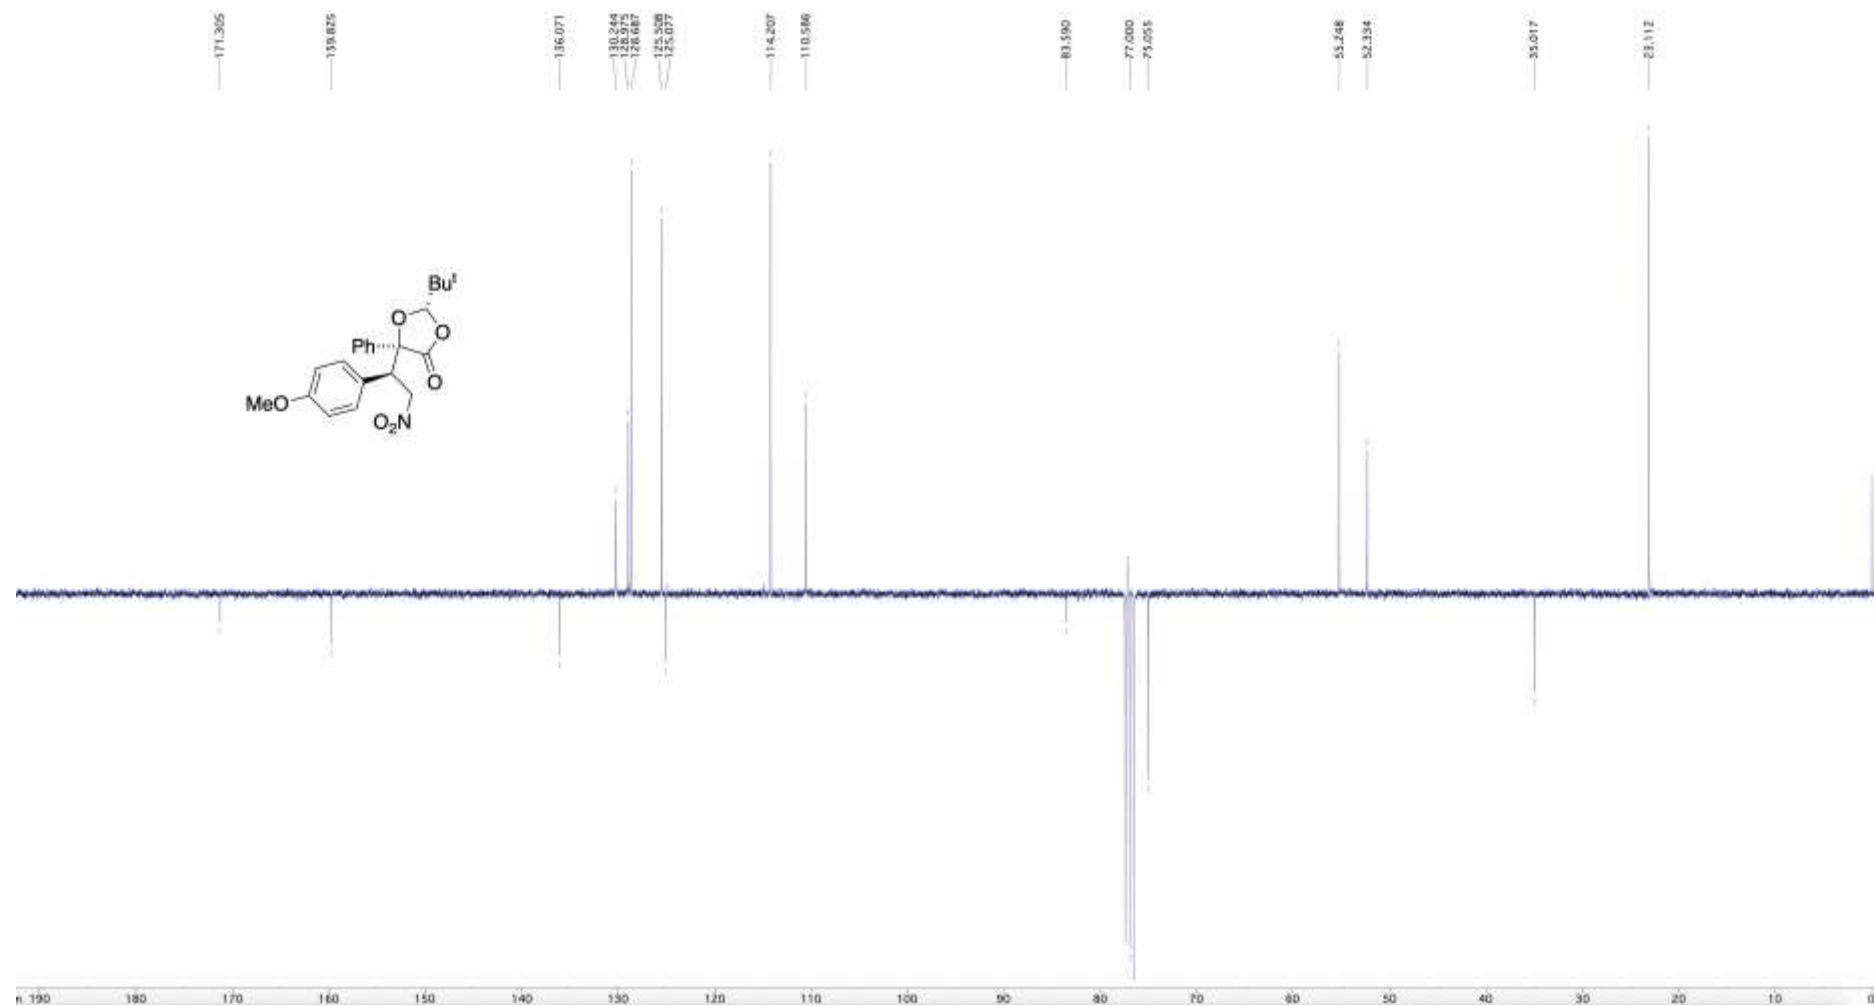

Figure S7. 300 MHz  $^1\text{H}$  NMR spectrum of **6b**

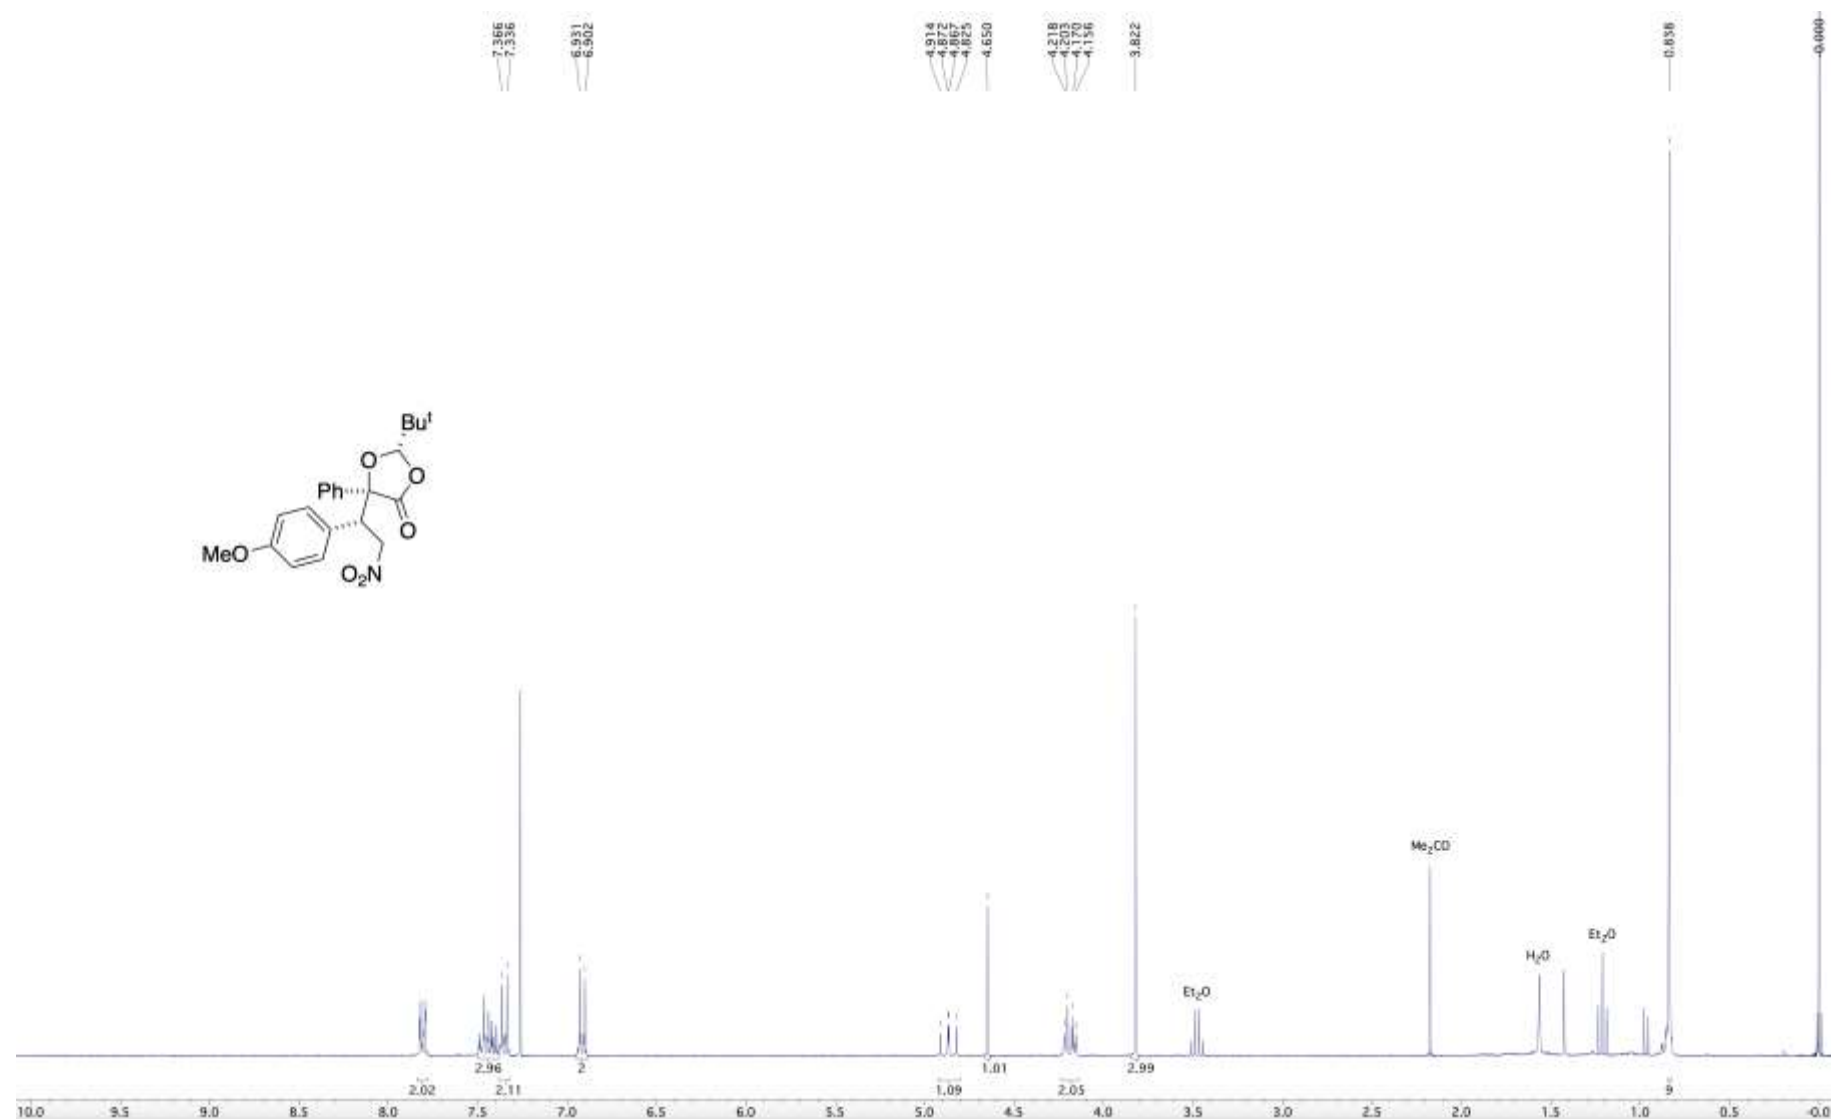



Figure S8. 75 MHz DEPTQ  $^{13}\text{C}$  NMR spectrum of **6b**

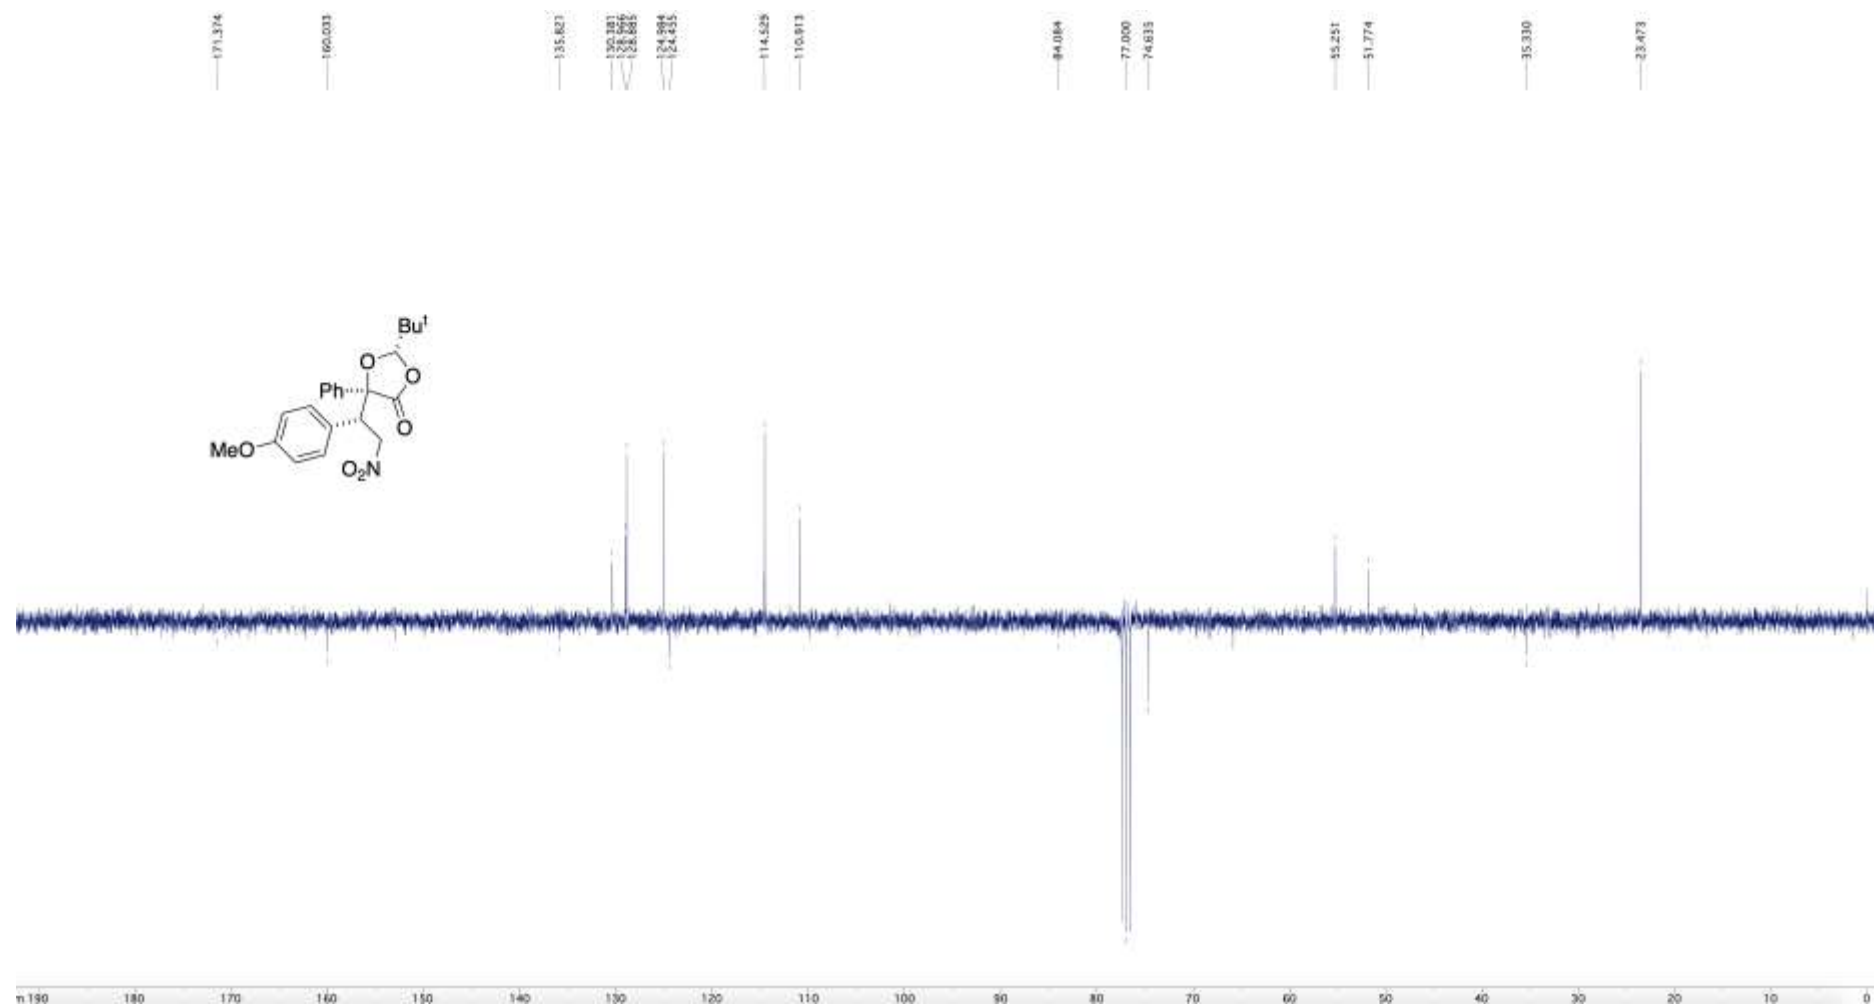

Figure S9. IR spectrum of **6b**

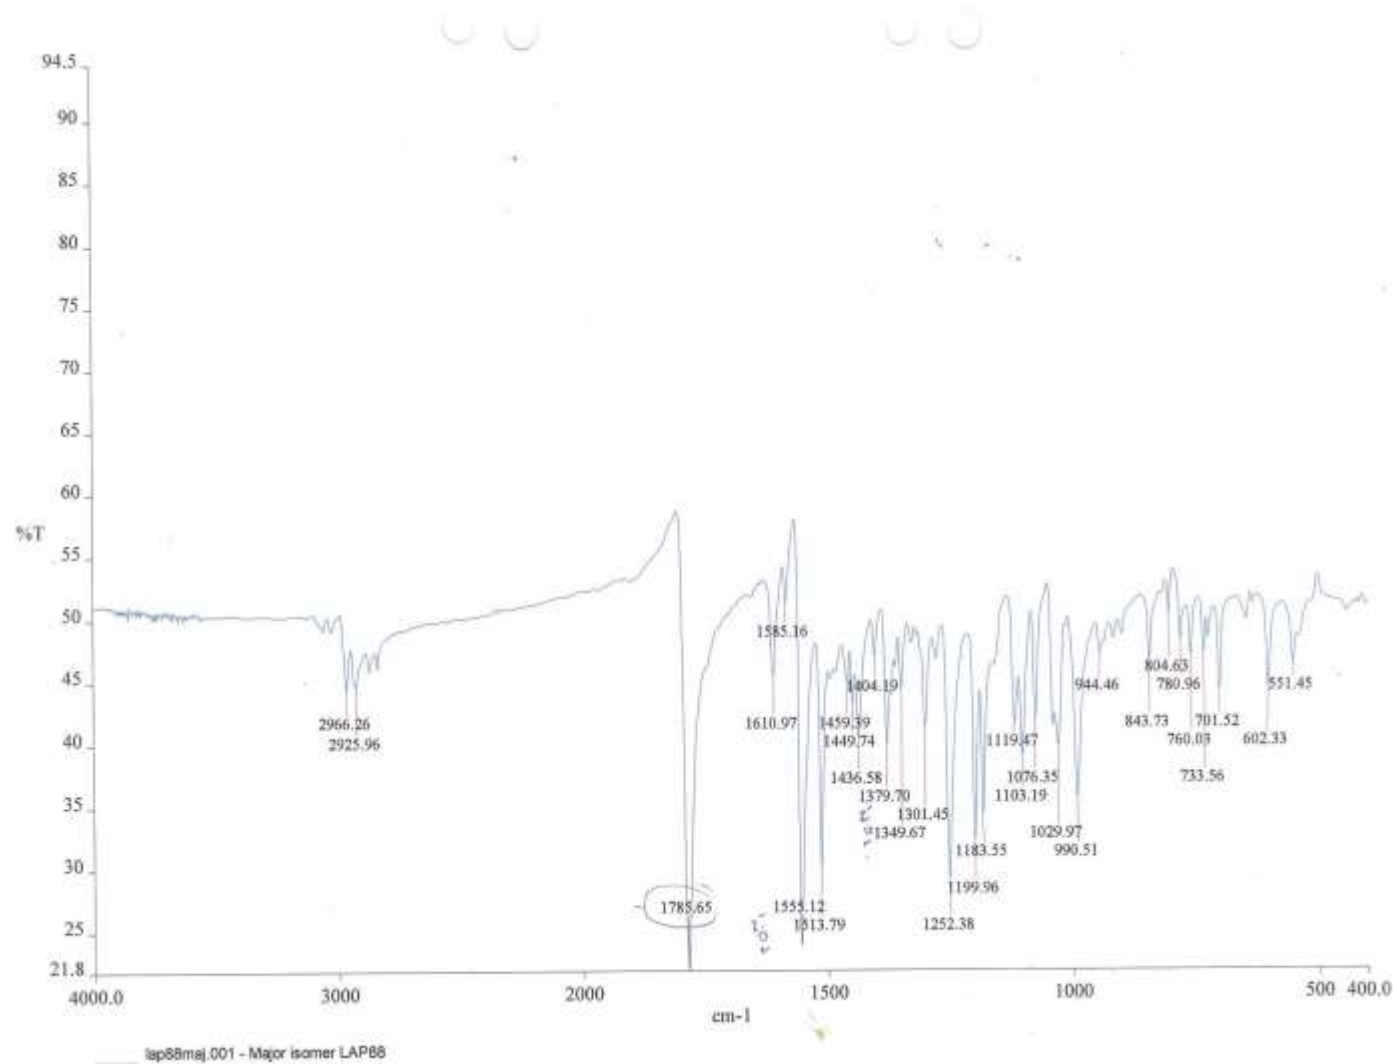

Figure S10. HRMS of 6b

## Elemental Composition Report

Page 1

## Single Mass Analysis

Tolerance = 30.0 PPM / DBE: min = -1.5, max = 40.0

Isotope cluster parameters: Separation = 1.0 Abundance = 1.0%

Monoisotopic Mass, Odd and Even Electron Ions

166 formula(e) evaluated with 19 results within limits (up to 8 closest results for each mass)

Lynn Power

University of St-Andrews  
School of Chemistry LCTOF

10-Nov-2005 11:33:16

LAP25fr19\_21am 18 (0.352) AM (Cen,2, 80.00, Ar,8000.0,325.19,0.76,LS 5); Cm (15:21-2:7)

1: TOF MS ES+  
1.64e4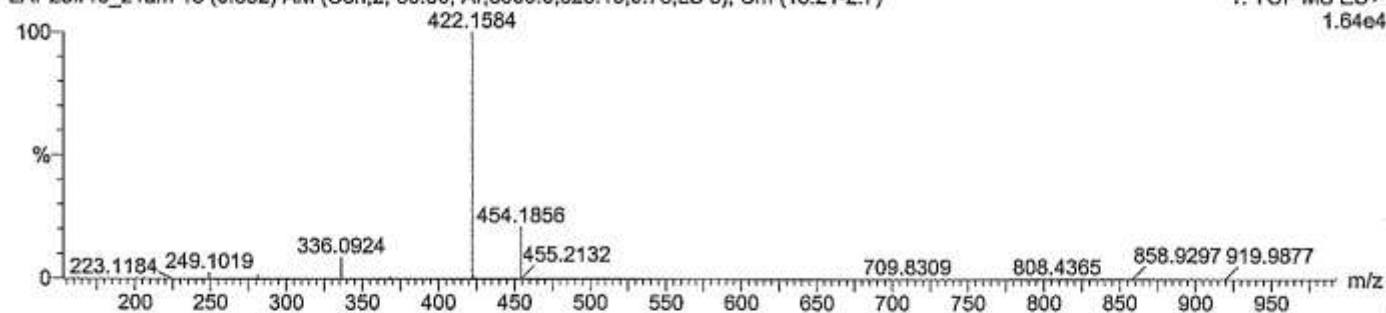

Minimum: -1.5  
Maximum: 200.0 30.0 40.0

| Mass     | Calc. Mass | mDa  | PPM   | DBE  | Score | Formula          |
|----------|------------|------|-------|------|-------|------------------|
| 422.1584 | 422.1580   | 0.5  | 1.2   | 10.5 | 3     | C22 H25 N O6 Na  |
|          | 422.1604   | -1.9 | -4.5  | 13.5 | 4     | C24 H24 N O6     |
|          | 422.1563   | 2.1  | 5.0   | 9.5  | 2     | C19 H24 N3 O8    |
|          | 422.1606   | -2.2 | -5.2  | 15.0 | 5     | C25 H23 N2 O3 Na |
|          | 422.1539   | 4.5  | 10.7  | 6.5  | 1     | C17 H25 N3 O8 Na |
|          | 422.1630   | -4.6 | -10.9 | 18.0 | 6     | C27 H22 N2 O3    |
|          | 422.1633   | -4.9 | -11.5 | 19.5 | 7     | C28 H21 N3 Na    |
|          | 422.1647   | -6.2 | -14.7 | 19.0 | 8     | C30 H23 O Na     |

Figure S11. 300 MHz  $^1\text{H}$  NMR spectrum of **7a**

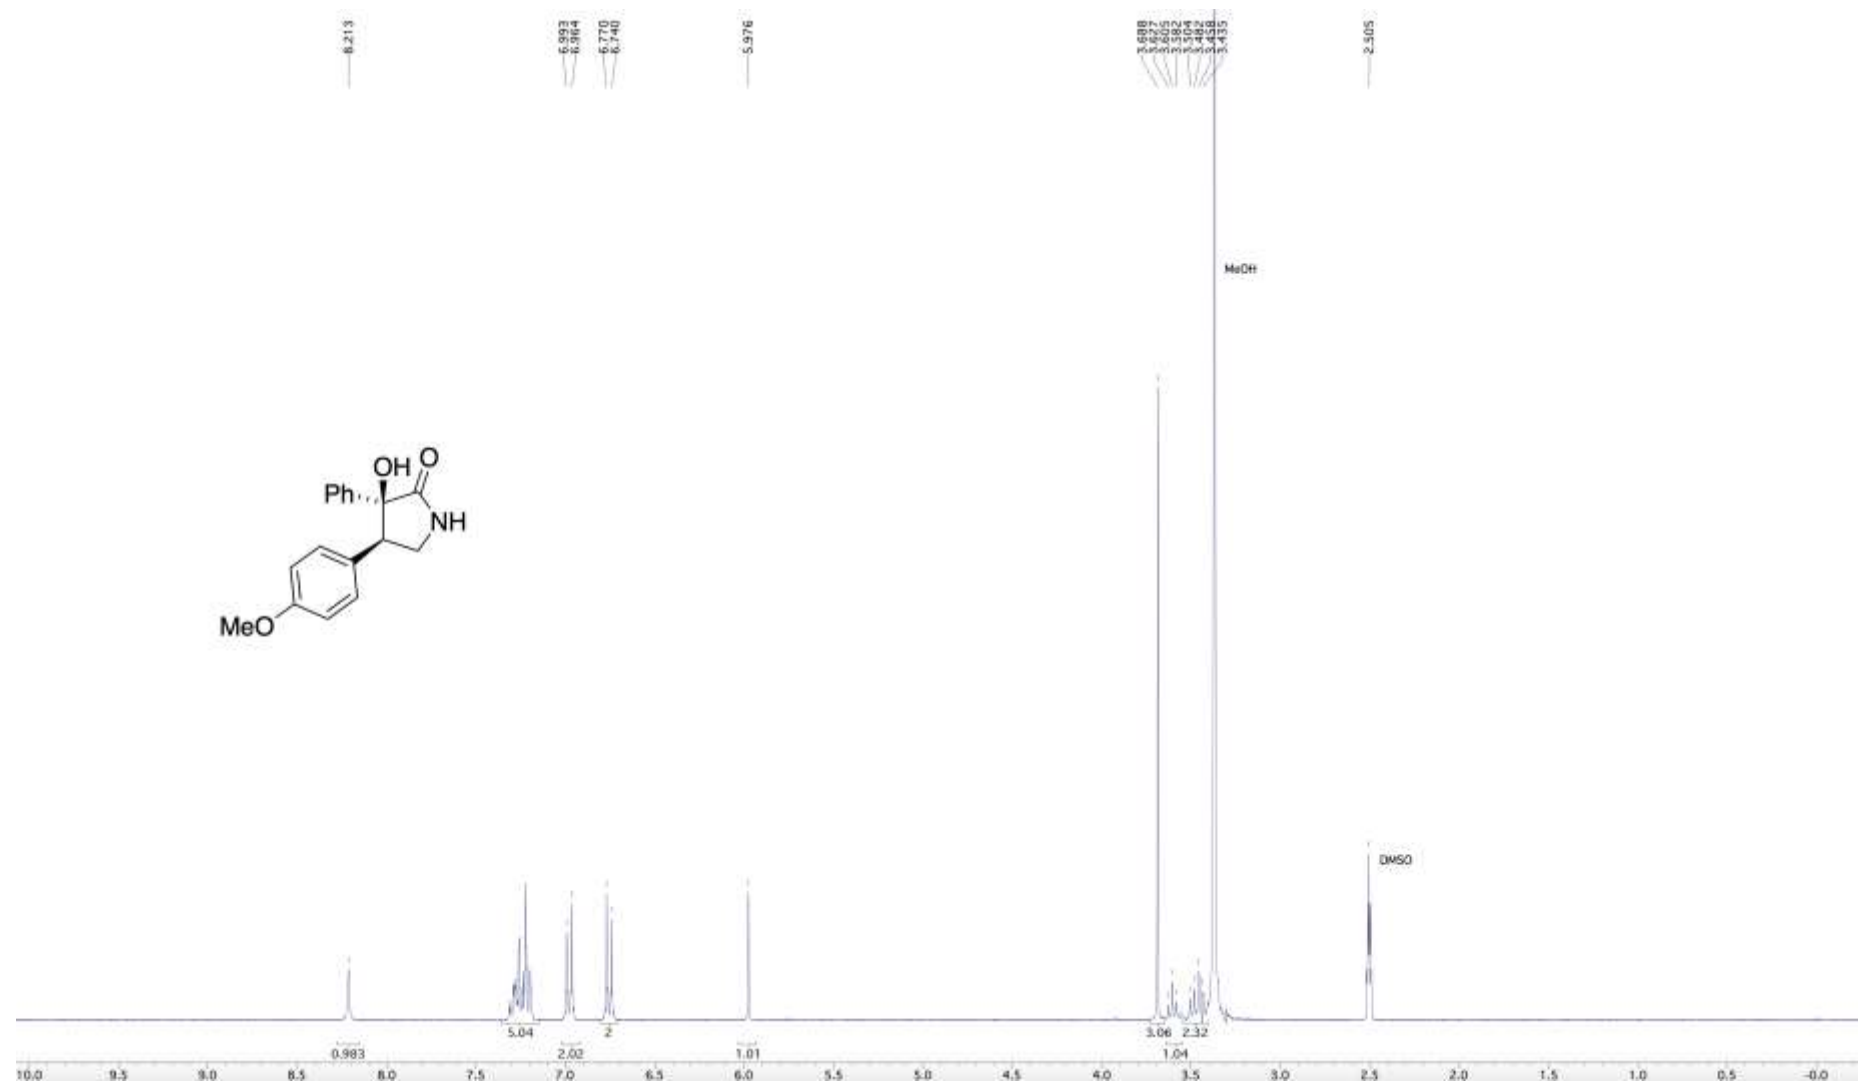

Figure S12. 75 MHz DEPTQ  $^{13}\text{C}$  NMR spectrum of **7a**

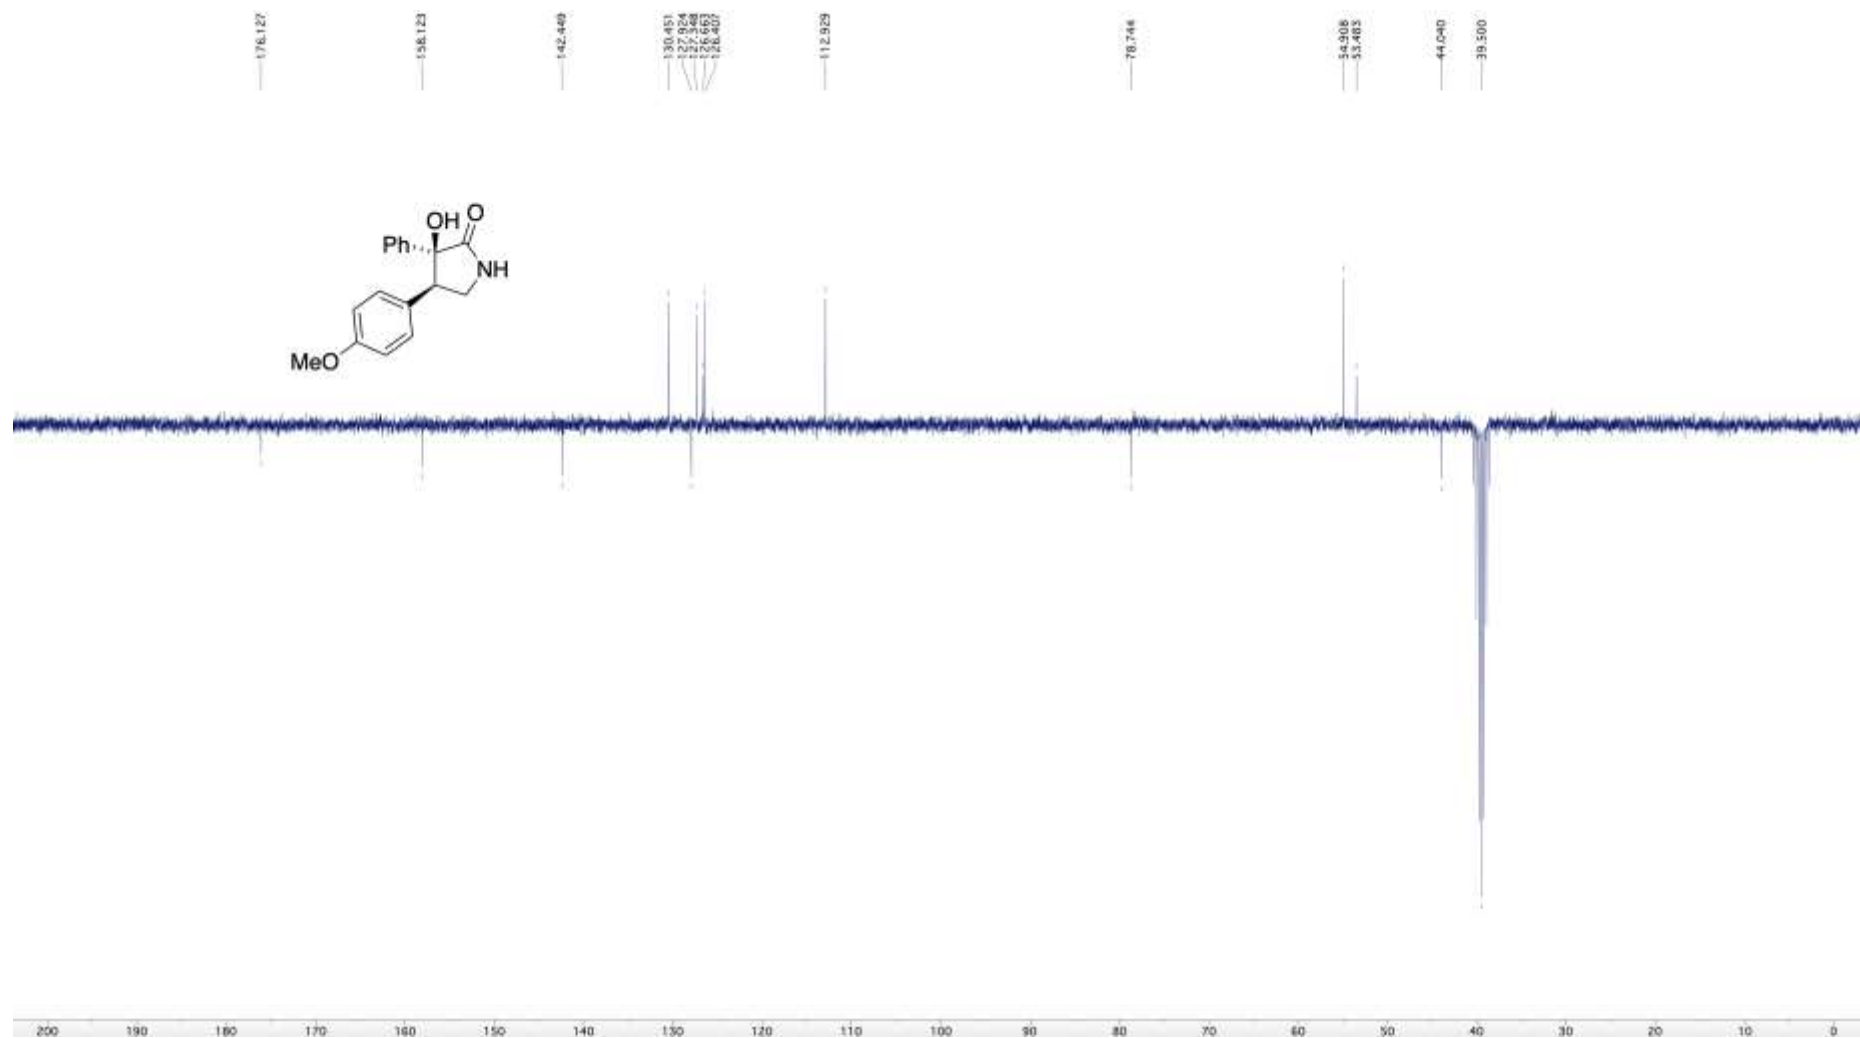

Figure S13. IR spectrum of **7a**

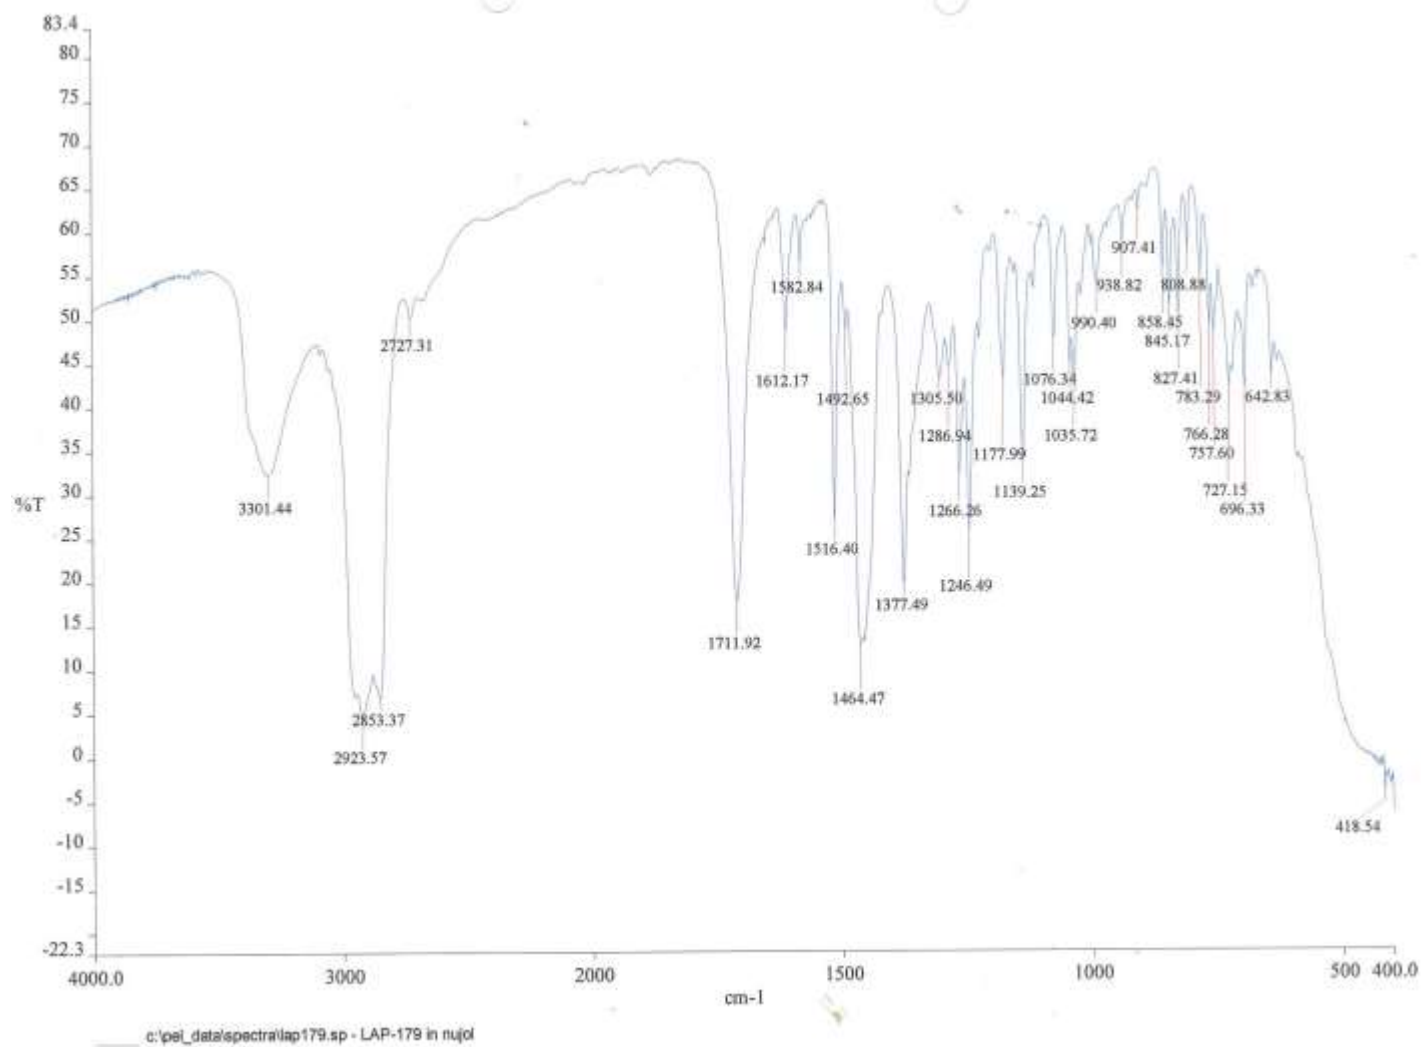

Figure S14. 300 MHz  $^1\text{H}$  NMR spectrum of **7b**

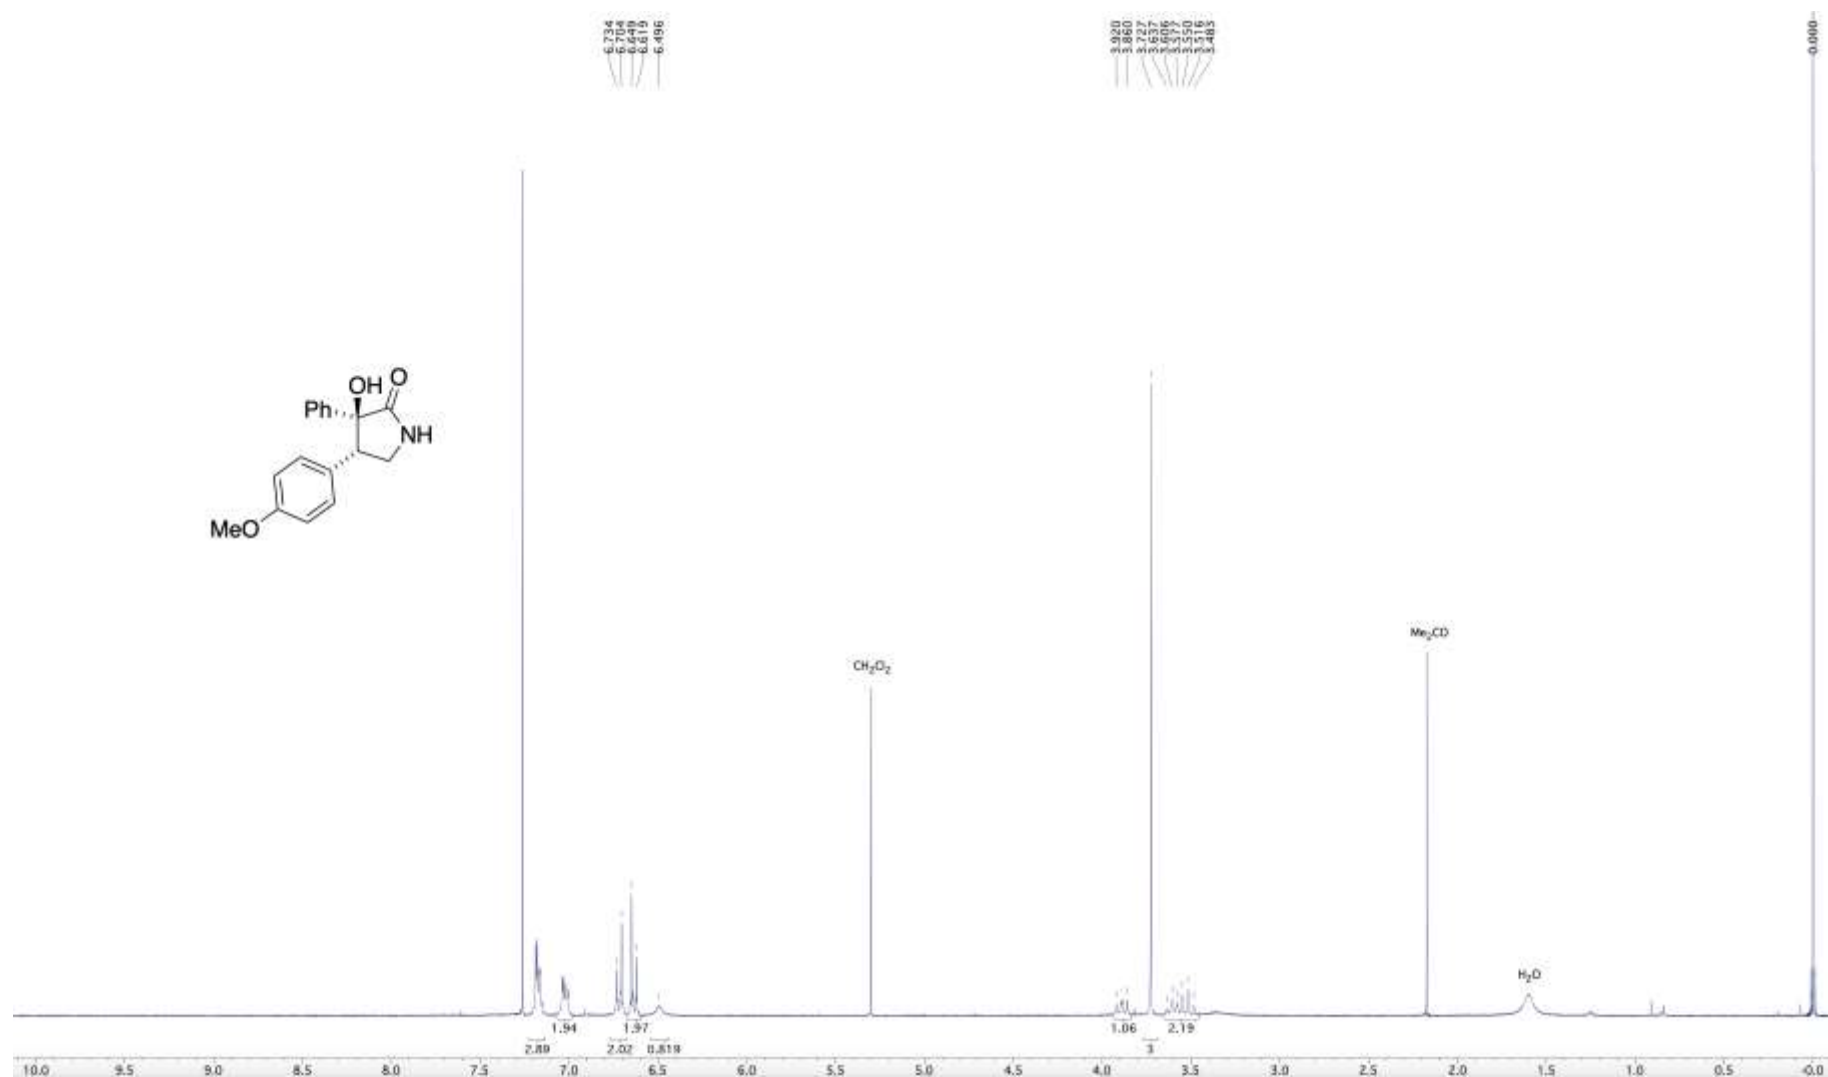

Figure S15. 75 MHz DEPTQ  $^{13}\text{C}$  NMR spectrum of **7b**

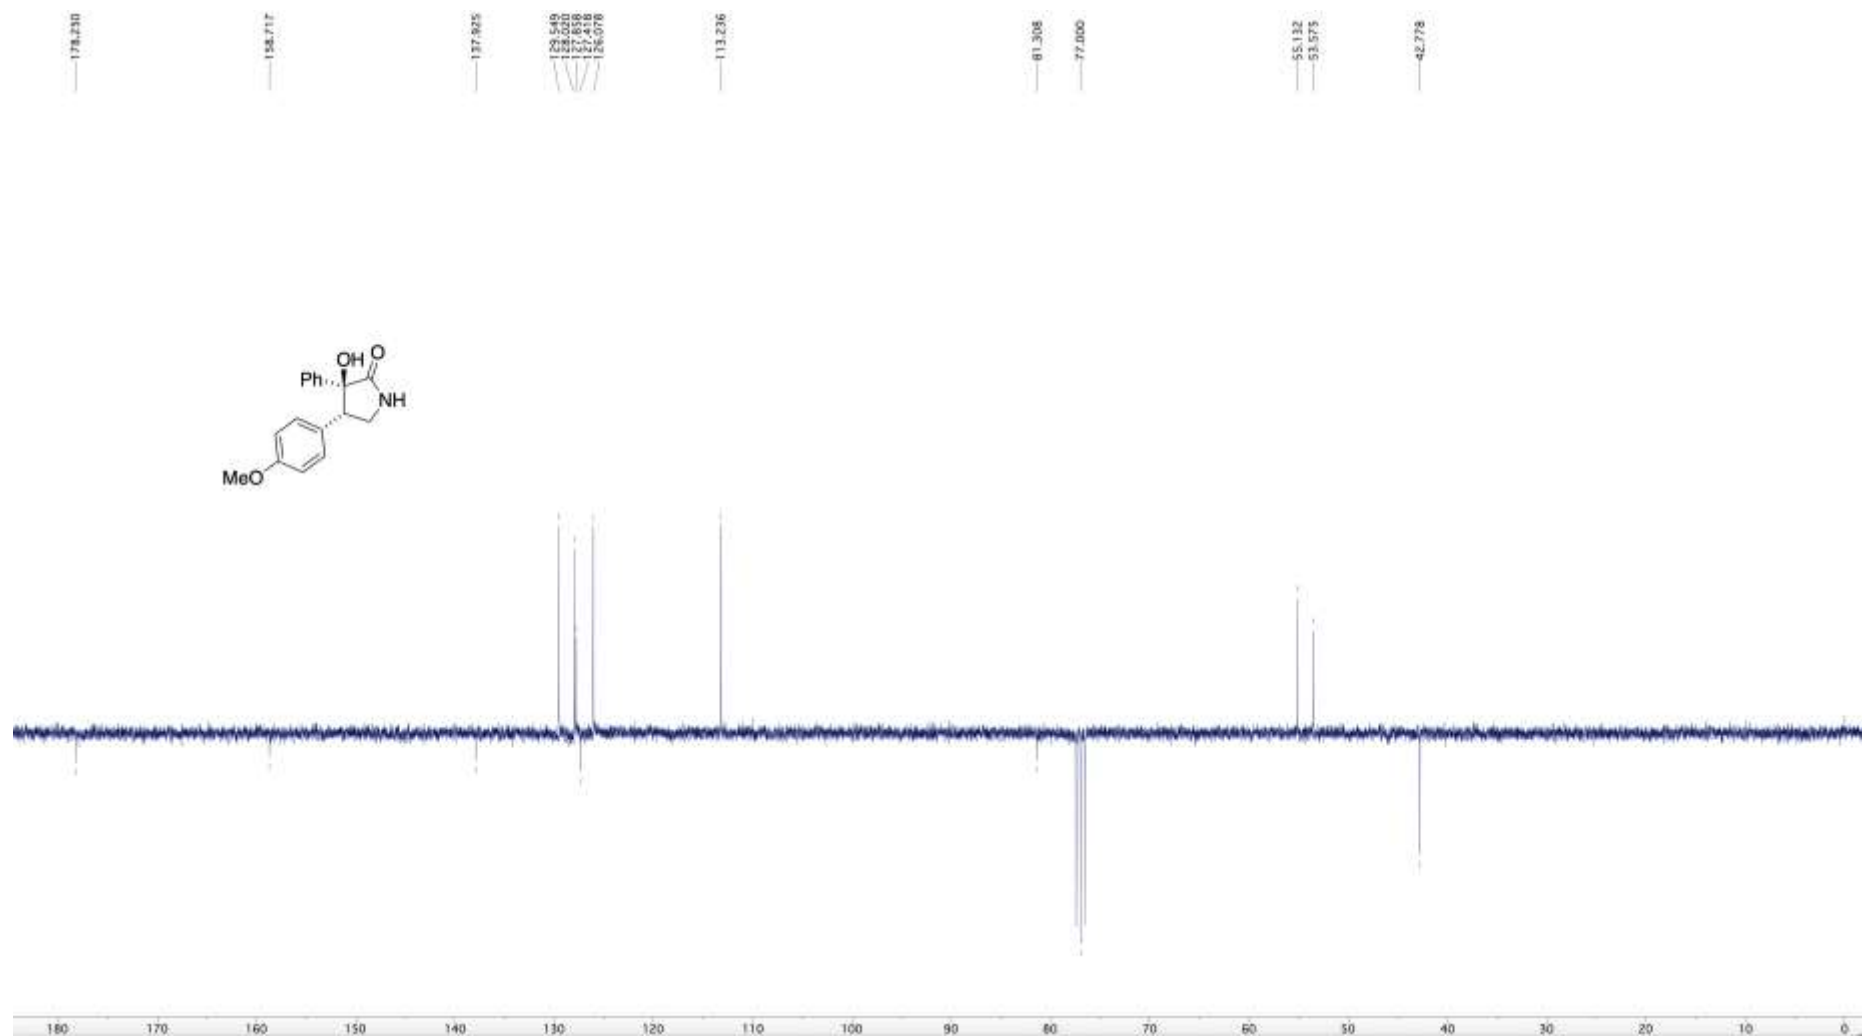



Figure S16. IR spectrum of **7b**

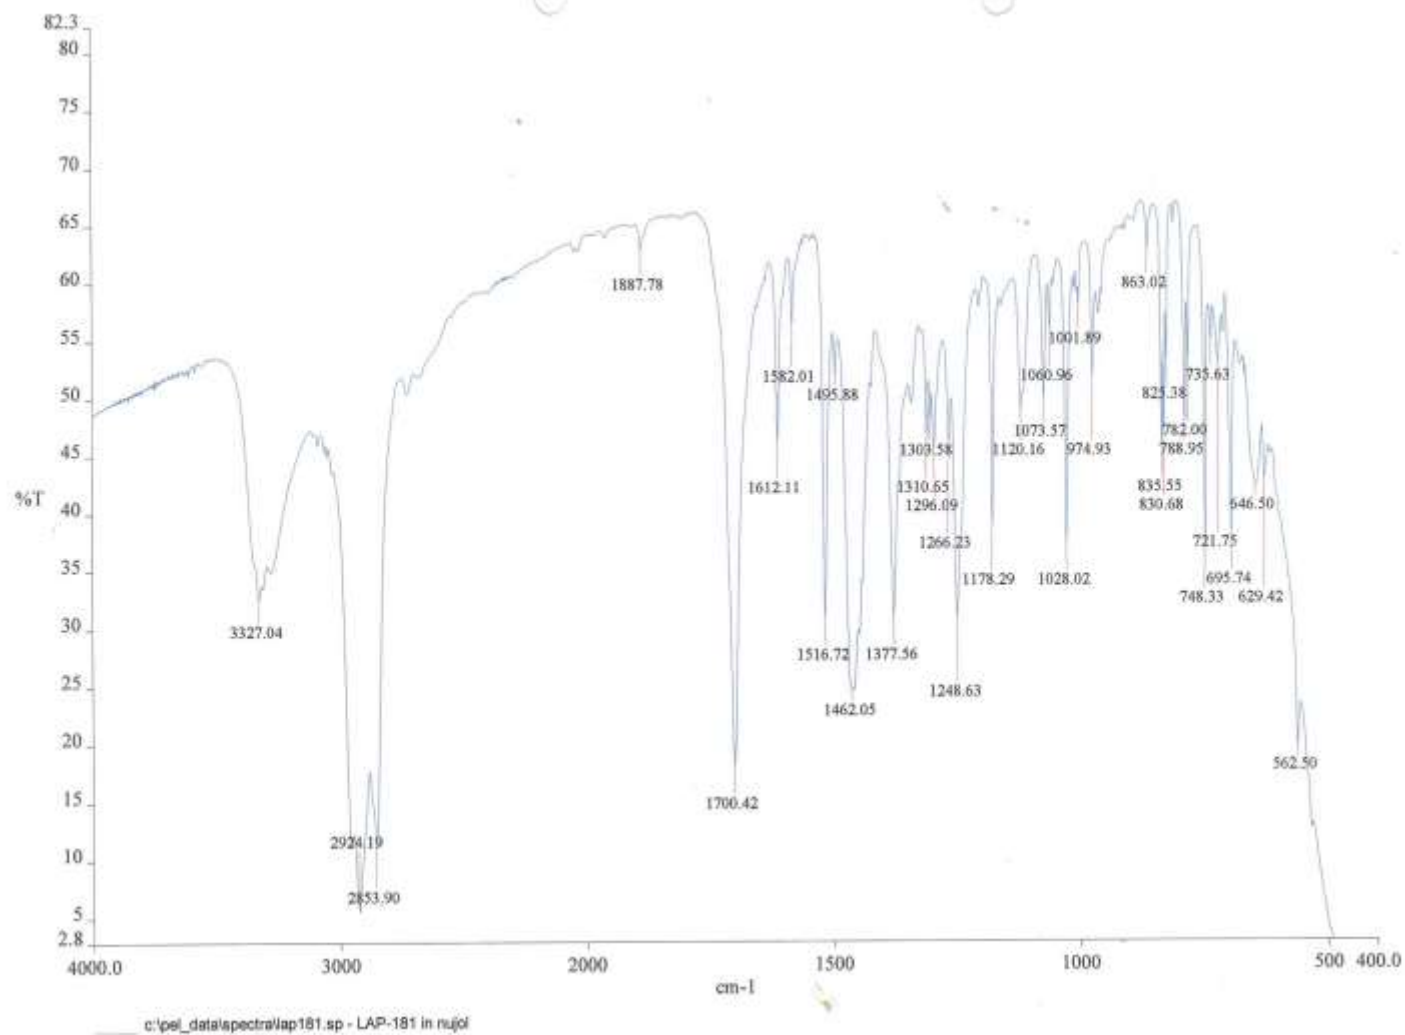

Figure S17. 300 MHz  $^1\text{H}$  NMR spectrum of **16**

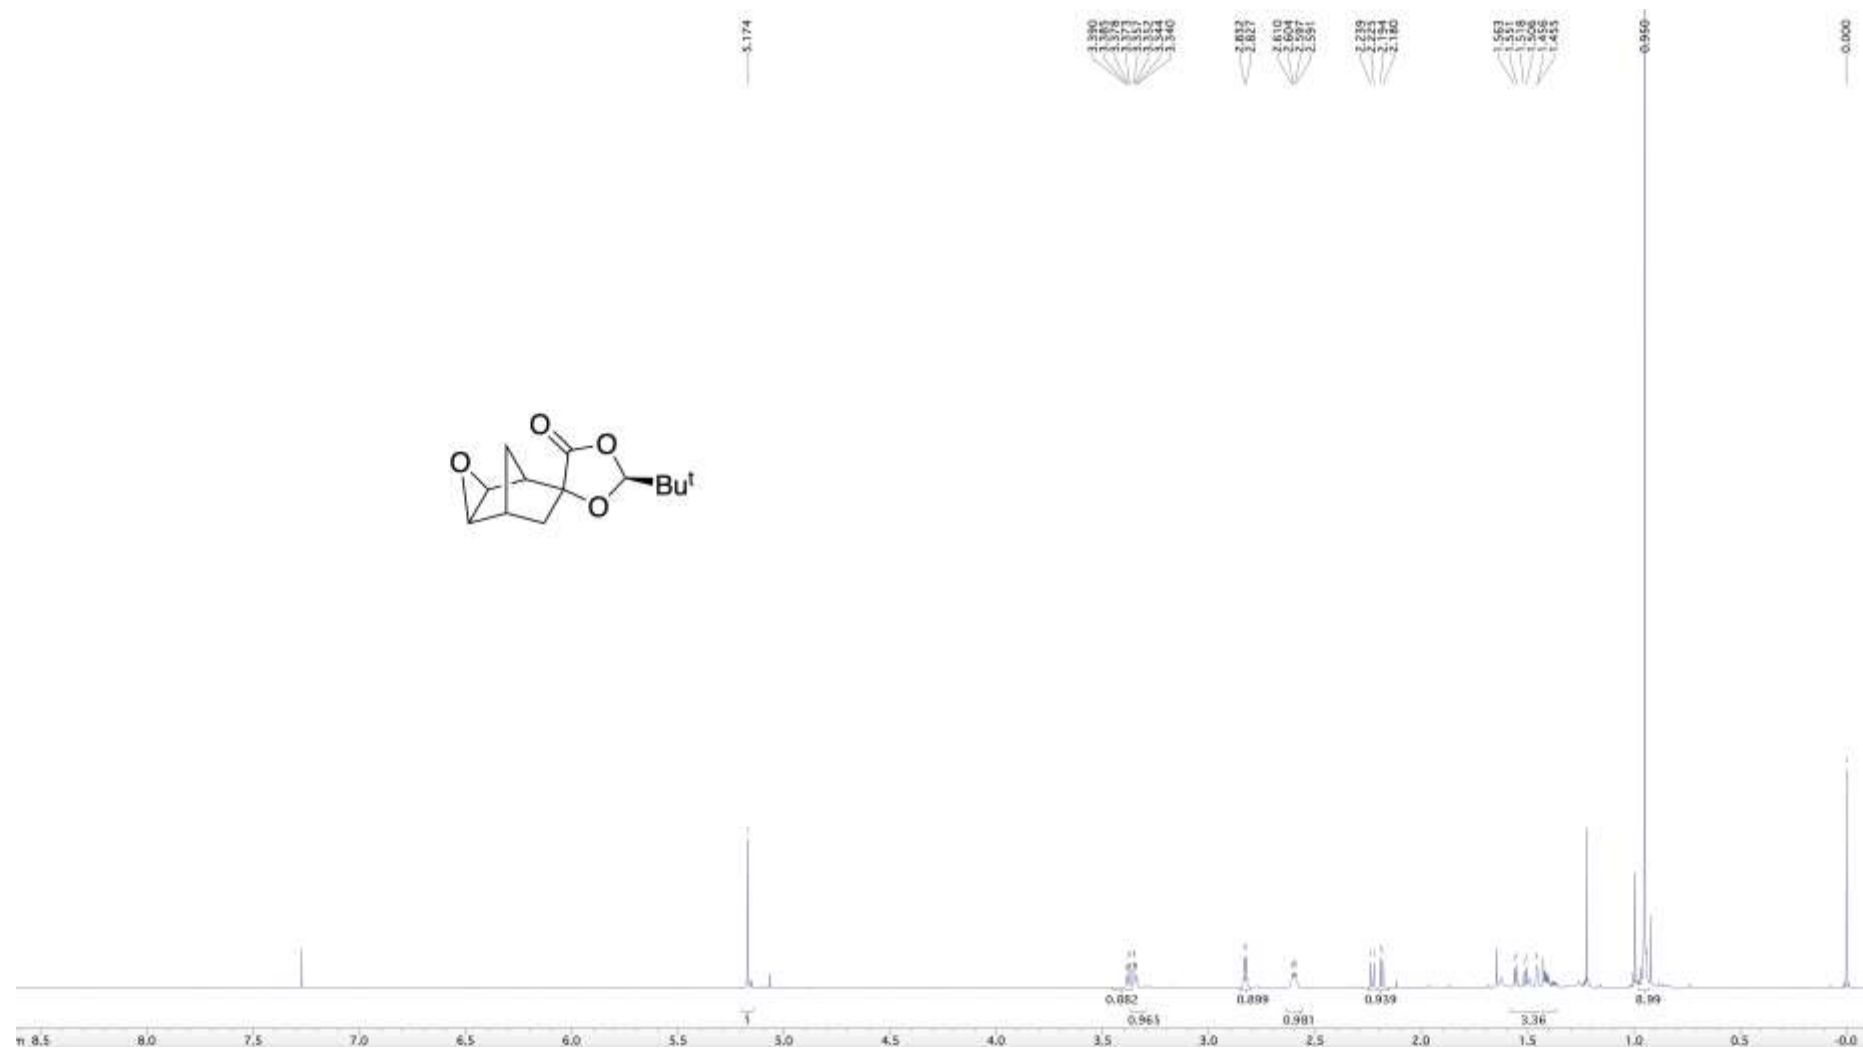

Figure S18. 75 MHz DEPTQ  $^{13}\text{C}$  NMR spectrum of **16**

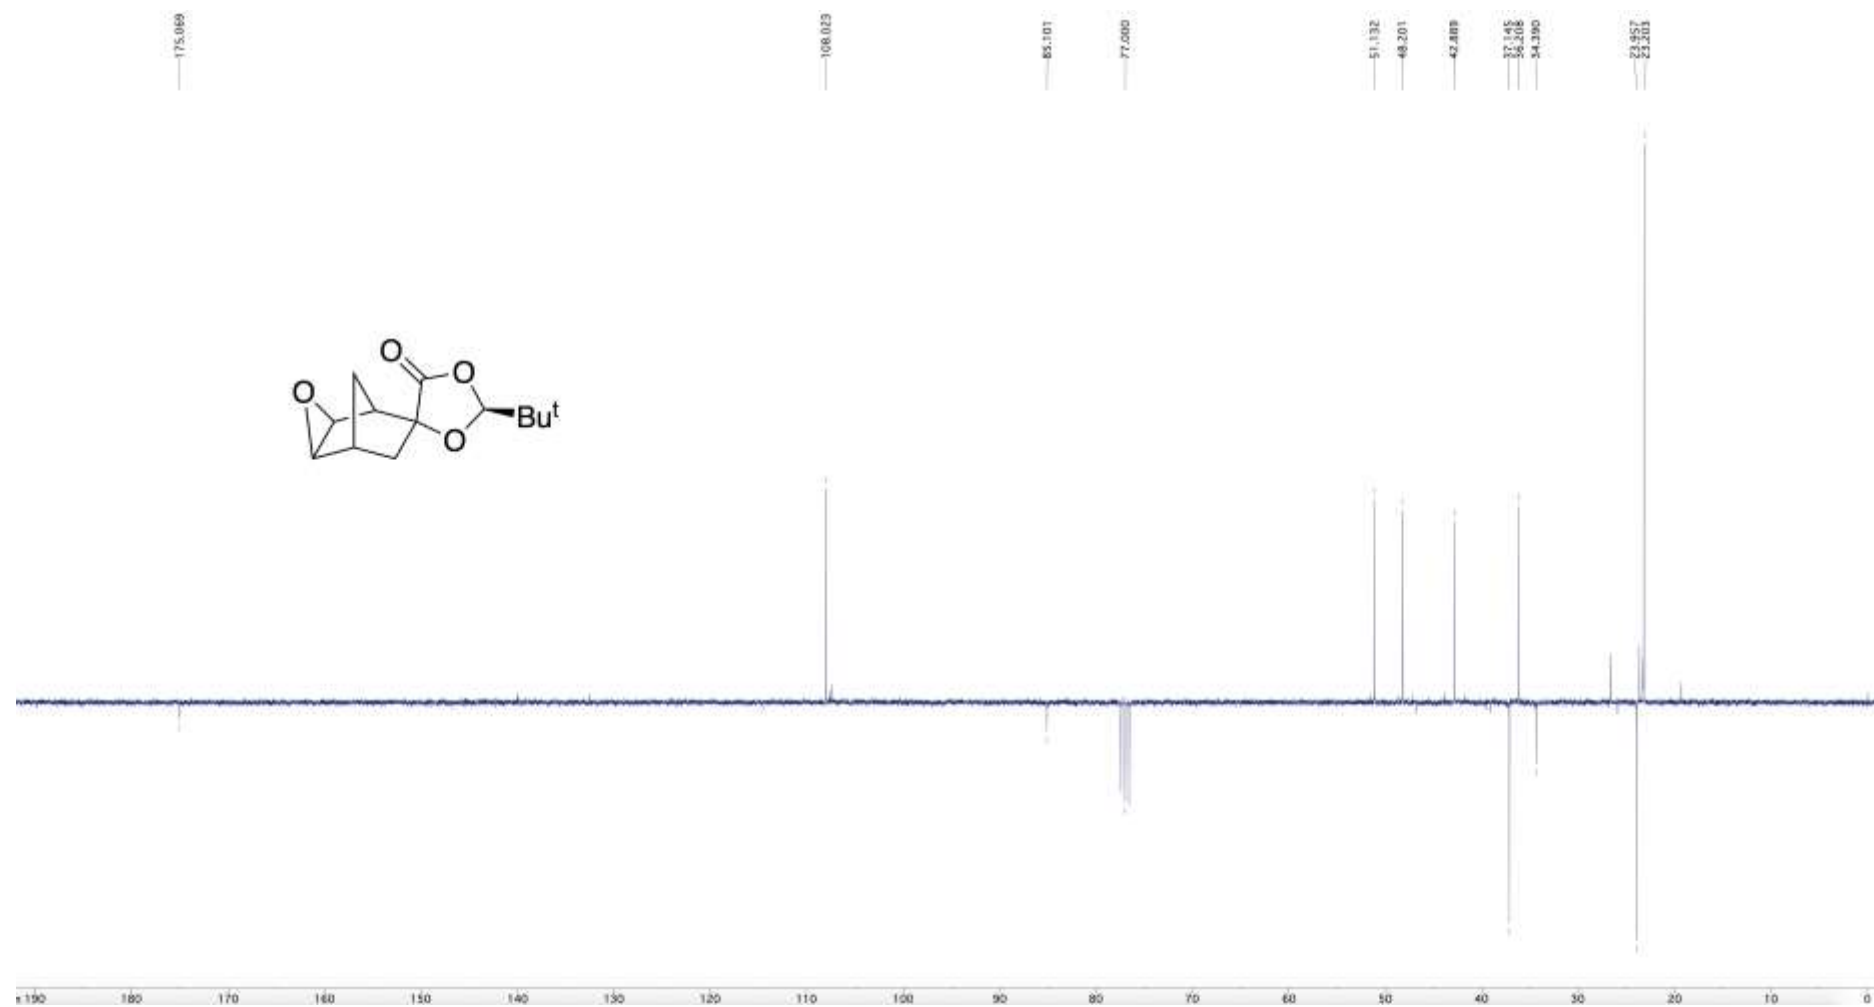

Figure S19. 300 MHz  $^1\text{H}$  NMR spectrum of **17**

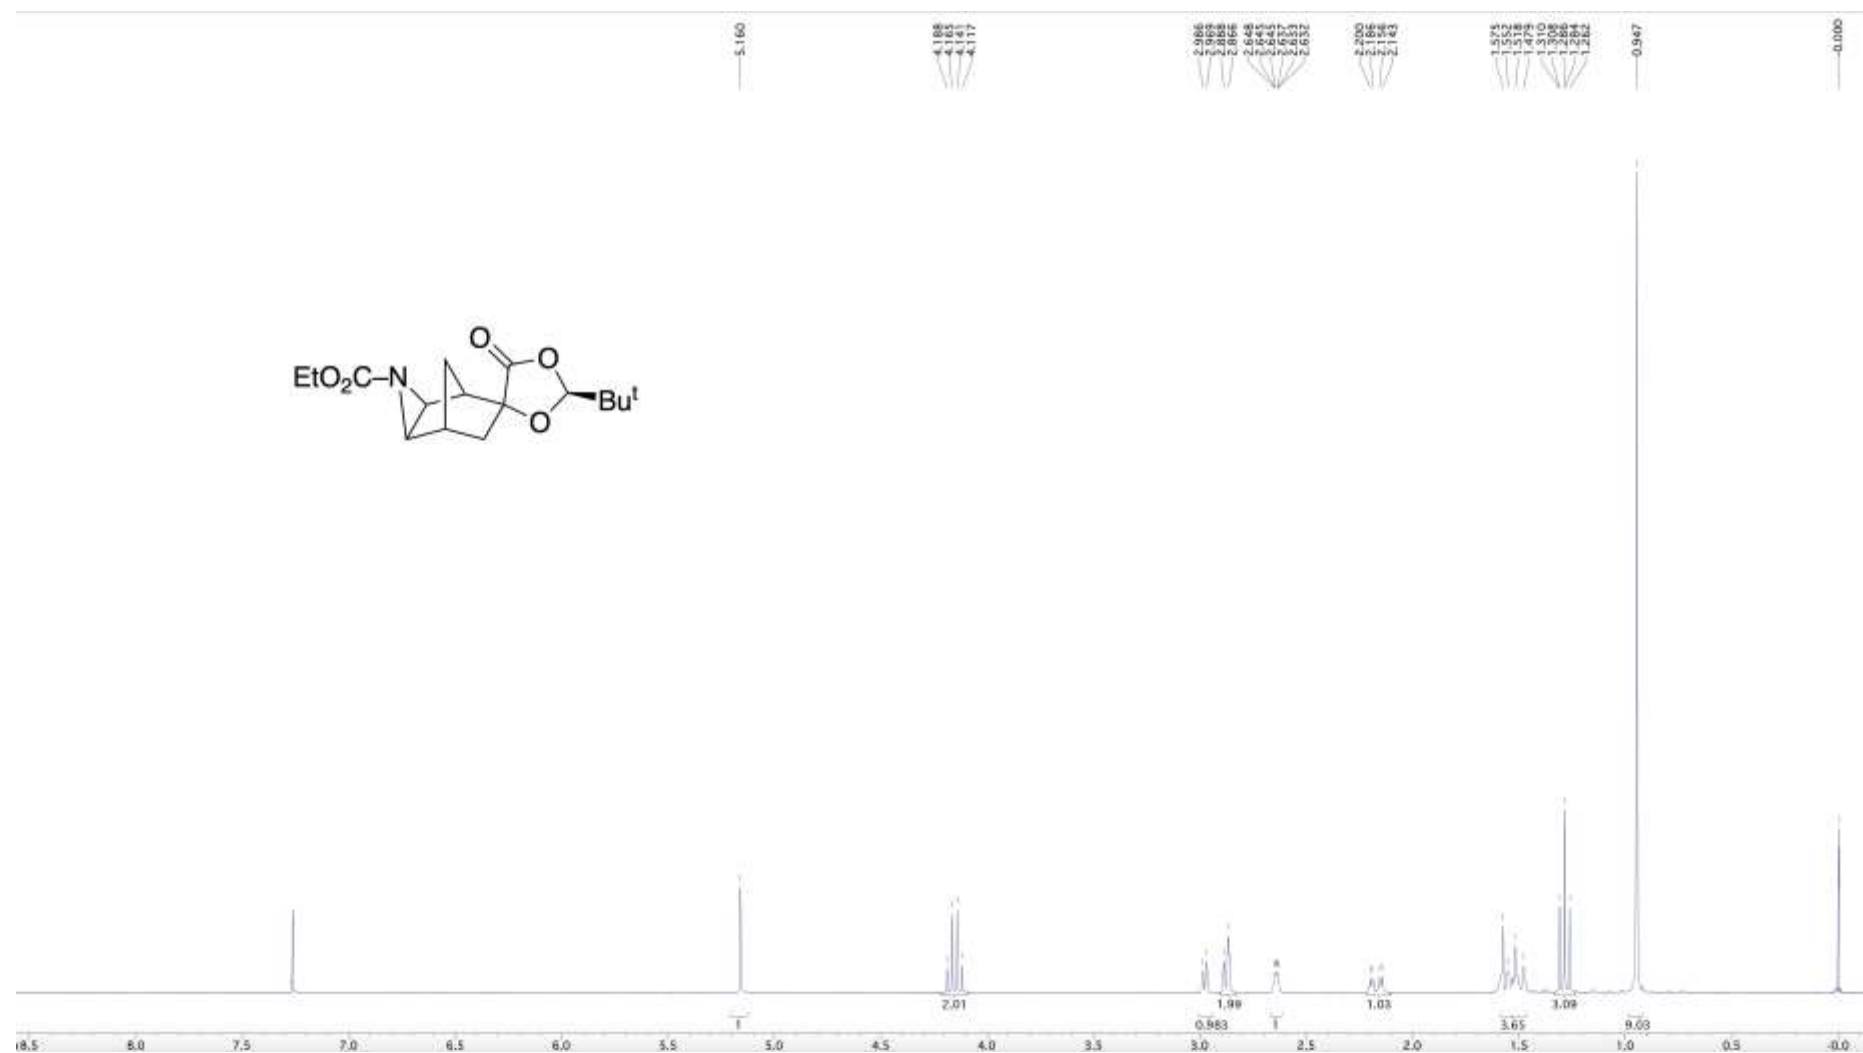

Figure S20. 75 MHz DEPTQ  $^{13}\text{C}$  NMR spectrum of **17**

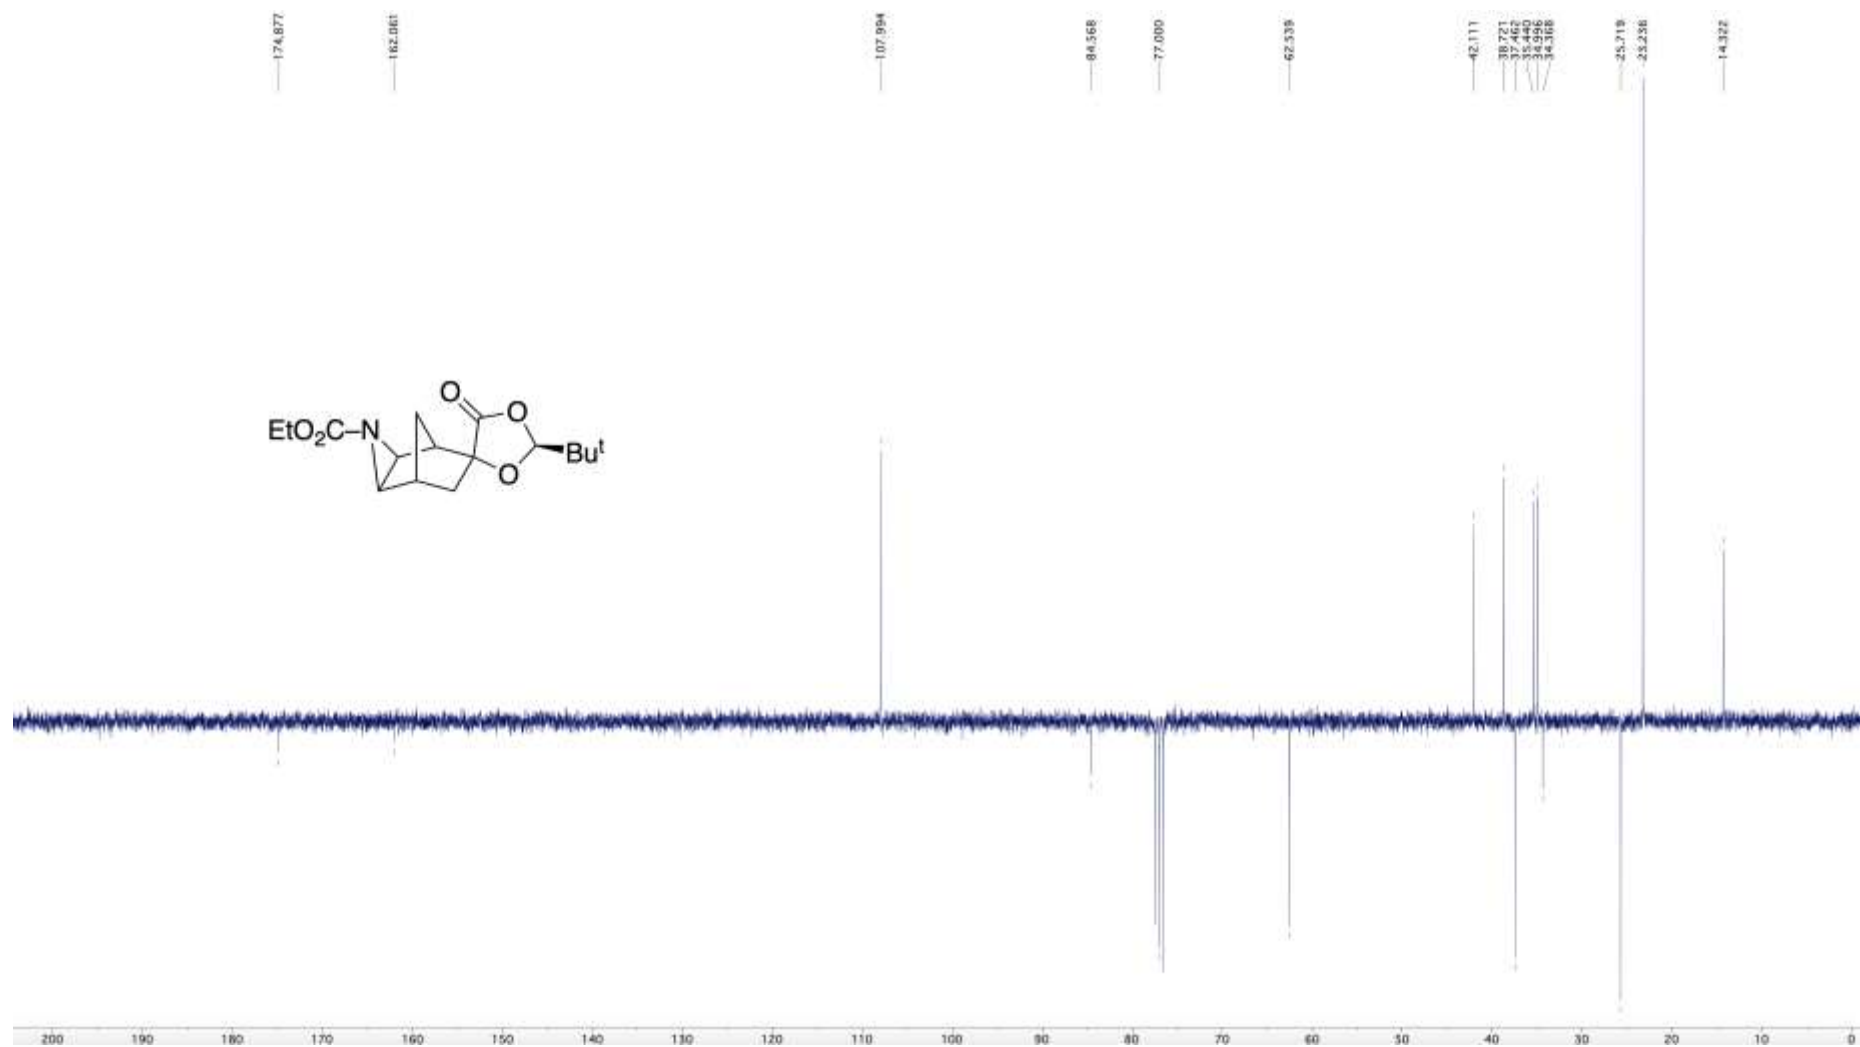

Figure S21. IR spectrum of **17**

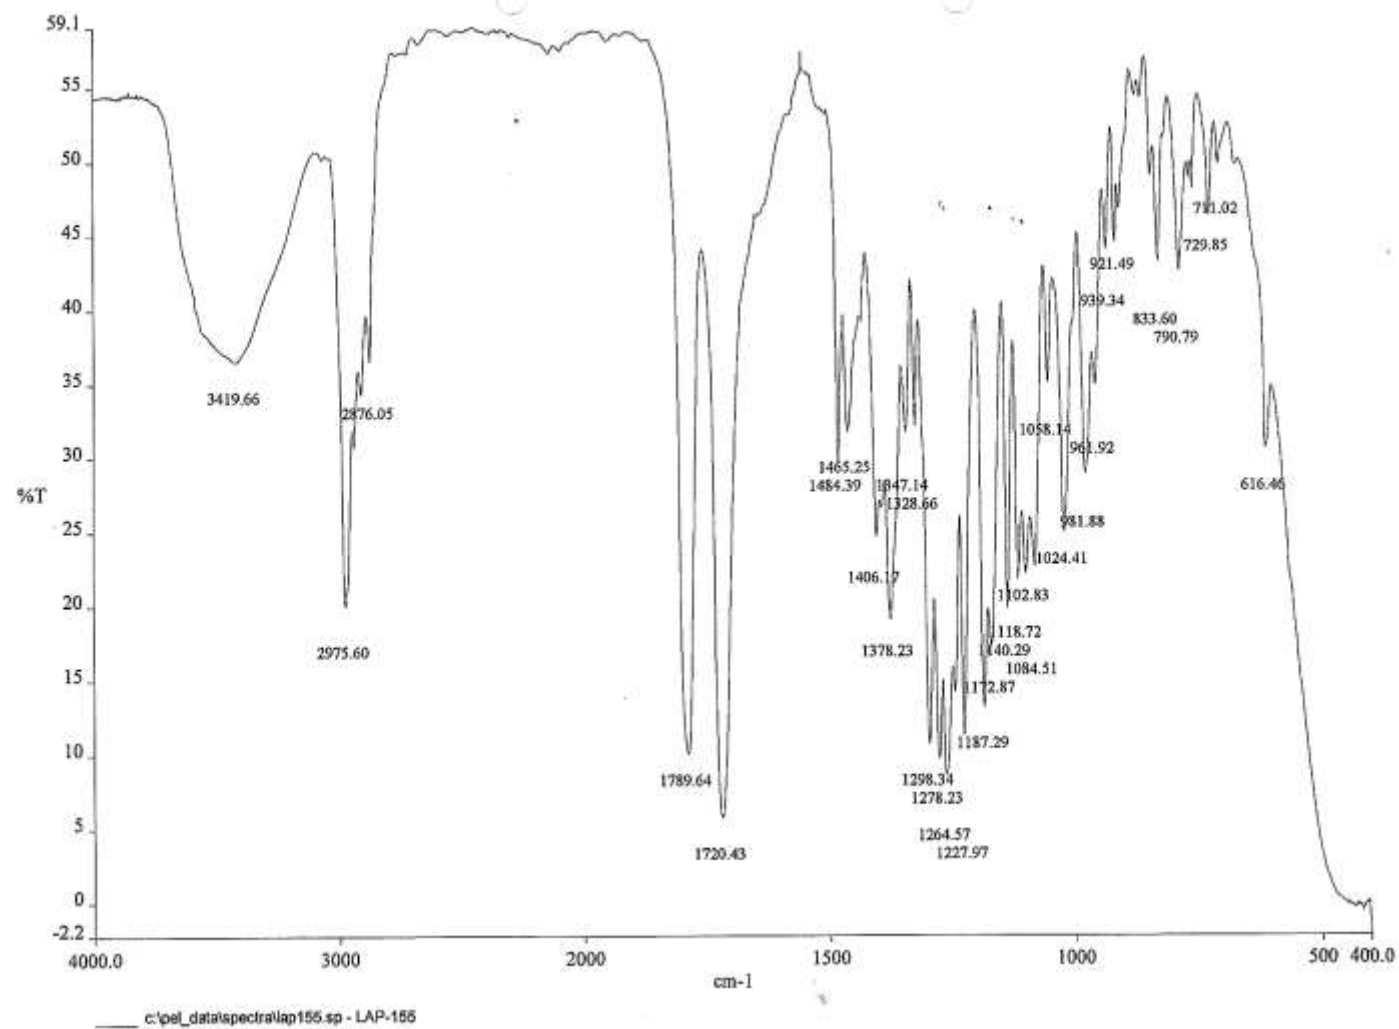

Figure S22. IR spectrum of **18**

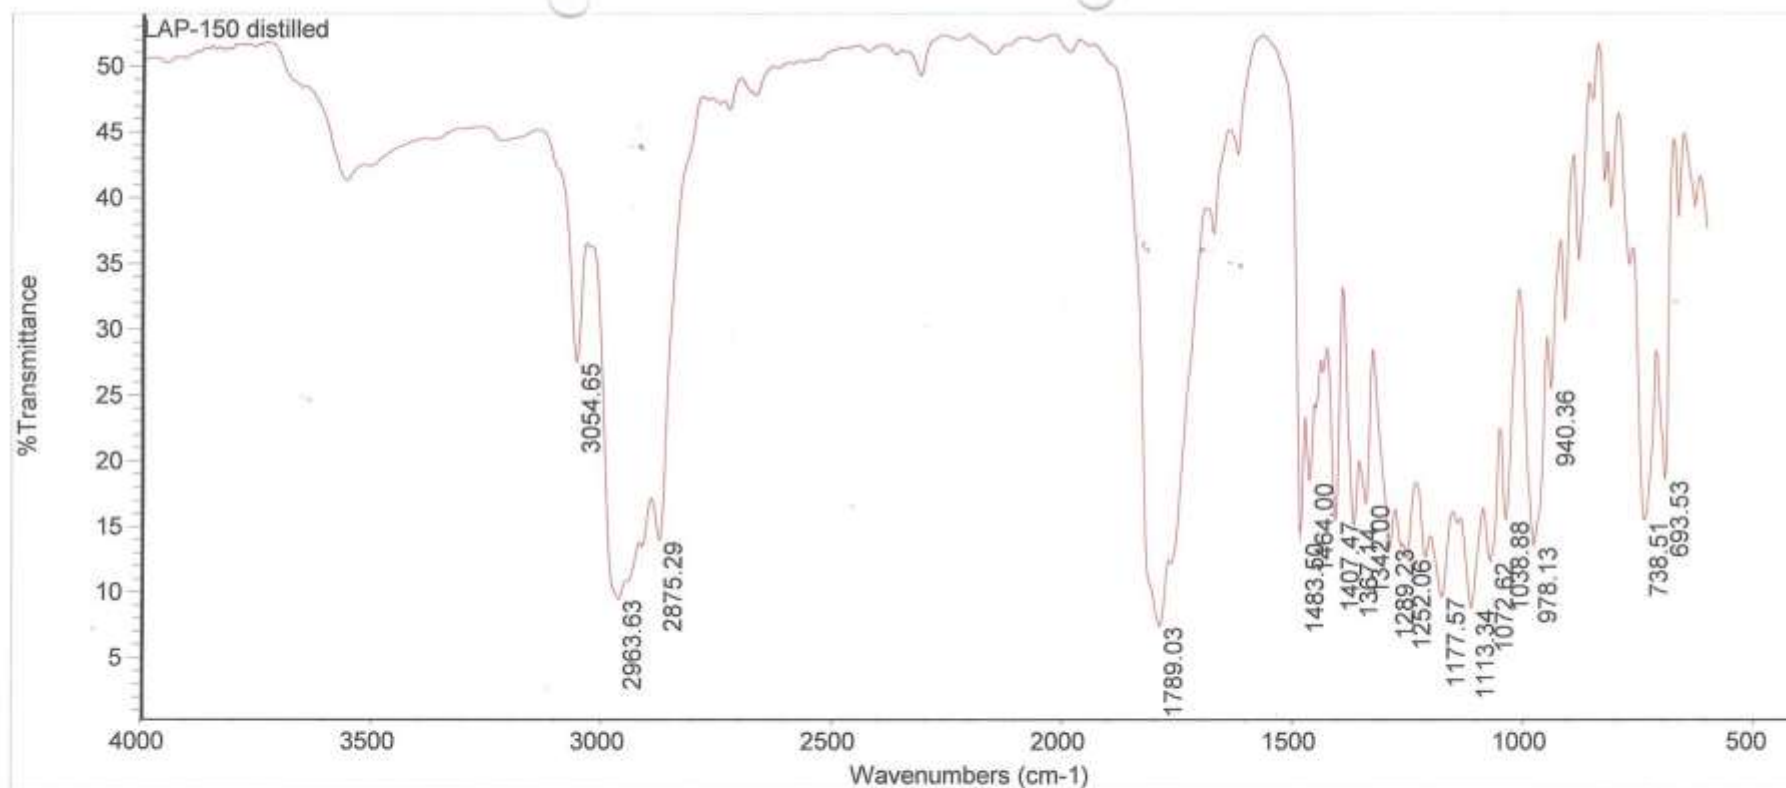

Fri Jul 06 13:59:47 2007 (GMT+01:00)

FIND PEAKS:

Spectrum: LAP-150 distilled  
Region: 4000.00 400.00  
Absolute threshold: 29.882

Figure S23. HRMS of **18**

# Elemental Composition Report

Page 1

## Single Mass Analysis

Tolerance = 50.0 PPM / DBE: min = -1.5, max = 40.0

Isotope cluster parameters: Separation = 1.0 Abundance = 1.0%

Monoisotopic Mass, Odd and Even Electron Ions

18 formula(e) evaluated with 1 results within limits (up to 8 closest results for each mass)

Lynn Power

University of St Andrews  
School of Chemistry GCTOF

09-Jul-2007 11:44:41

LAP\_150\_ci 379 (8.317) Cm (388:382-1:32)

TOF MS Cl+  
5.20e5

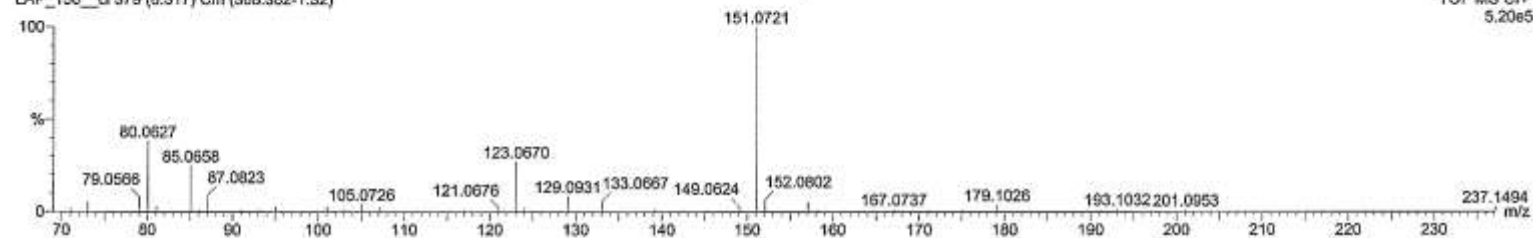

Minimum: -1.5  
Maximum: 40.0

| Mass     | Calc. Mass | mDa | PPM | DBE | Score | Formula        |
|----------|------------|-----|-----|-----|-------|----------------|
| 237.1494 | 237.1491   | 0.3 | 1.4 | 4.5 | 1     | C14 H21 O3 + H |



Figure S24. 300 MHz  $^1\text{H}$  NMR spectrum of **19**

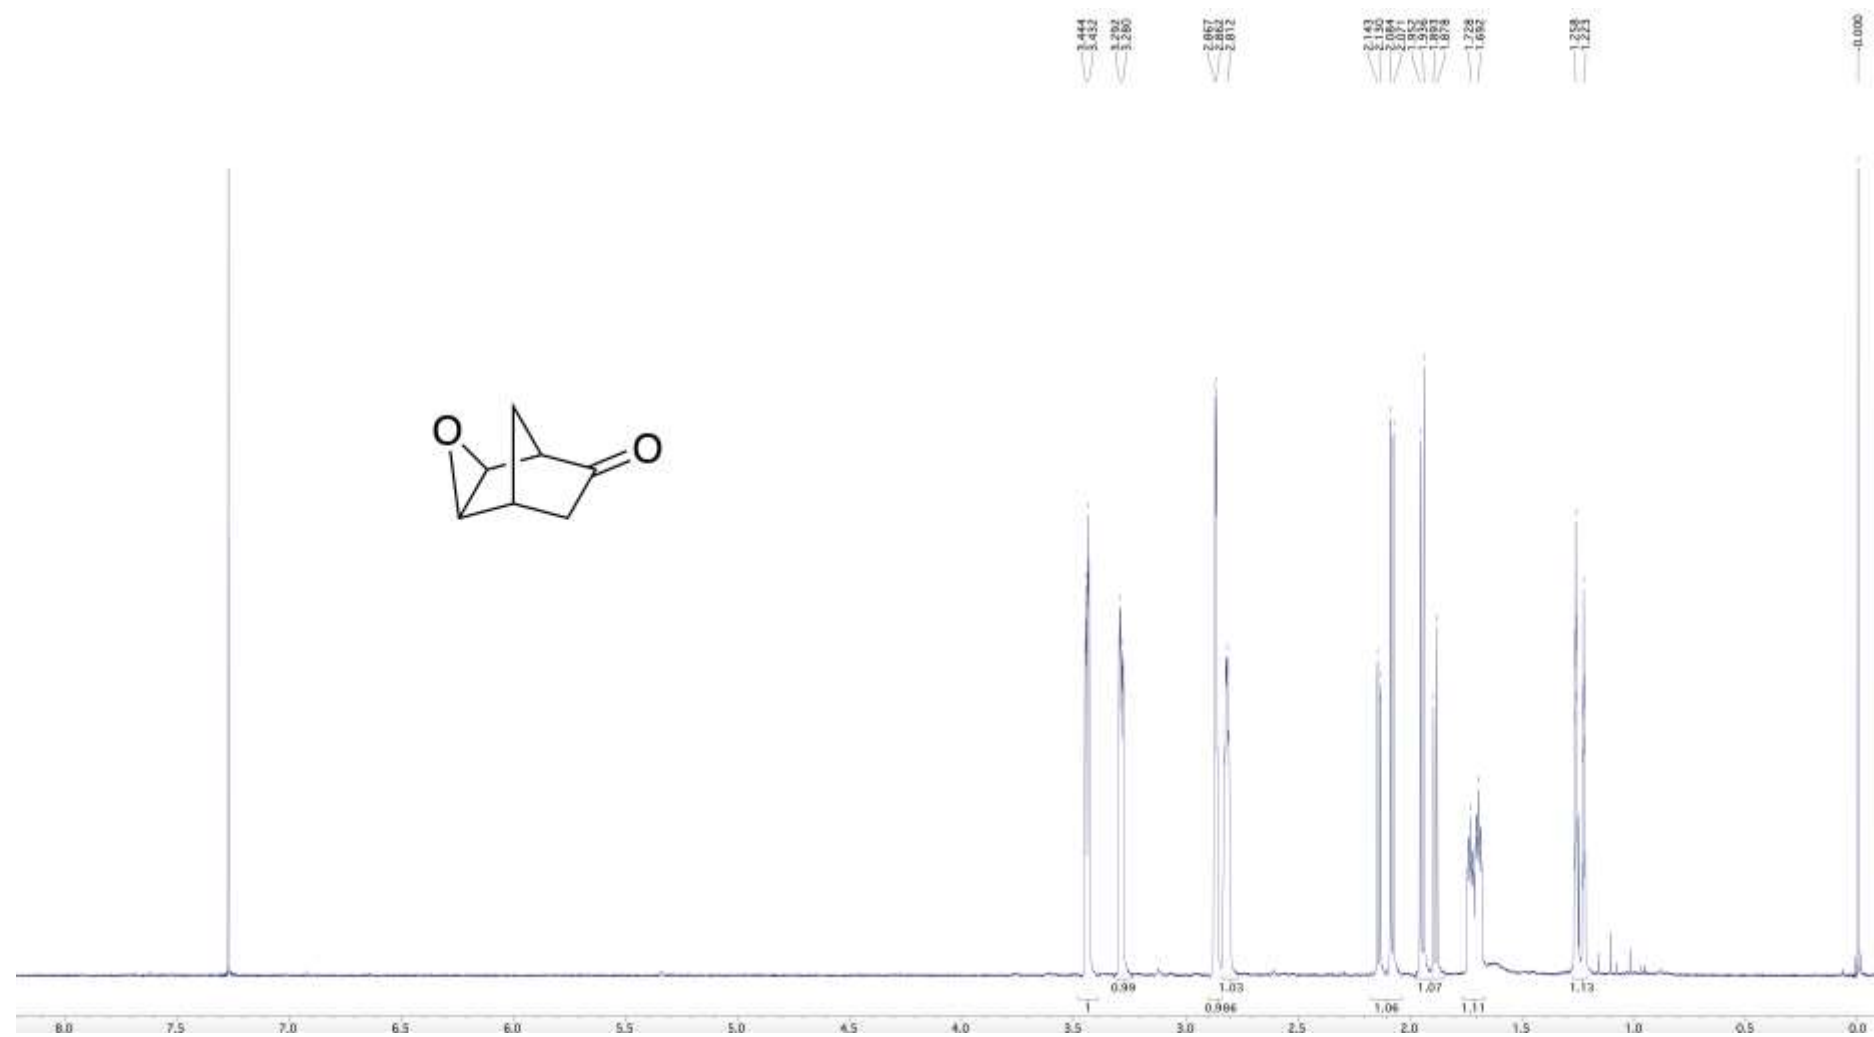

Figure S25. 300 MHz  $^1\text{H}$  NMR spectrum of **20**

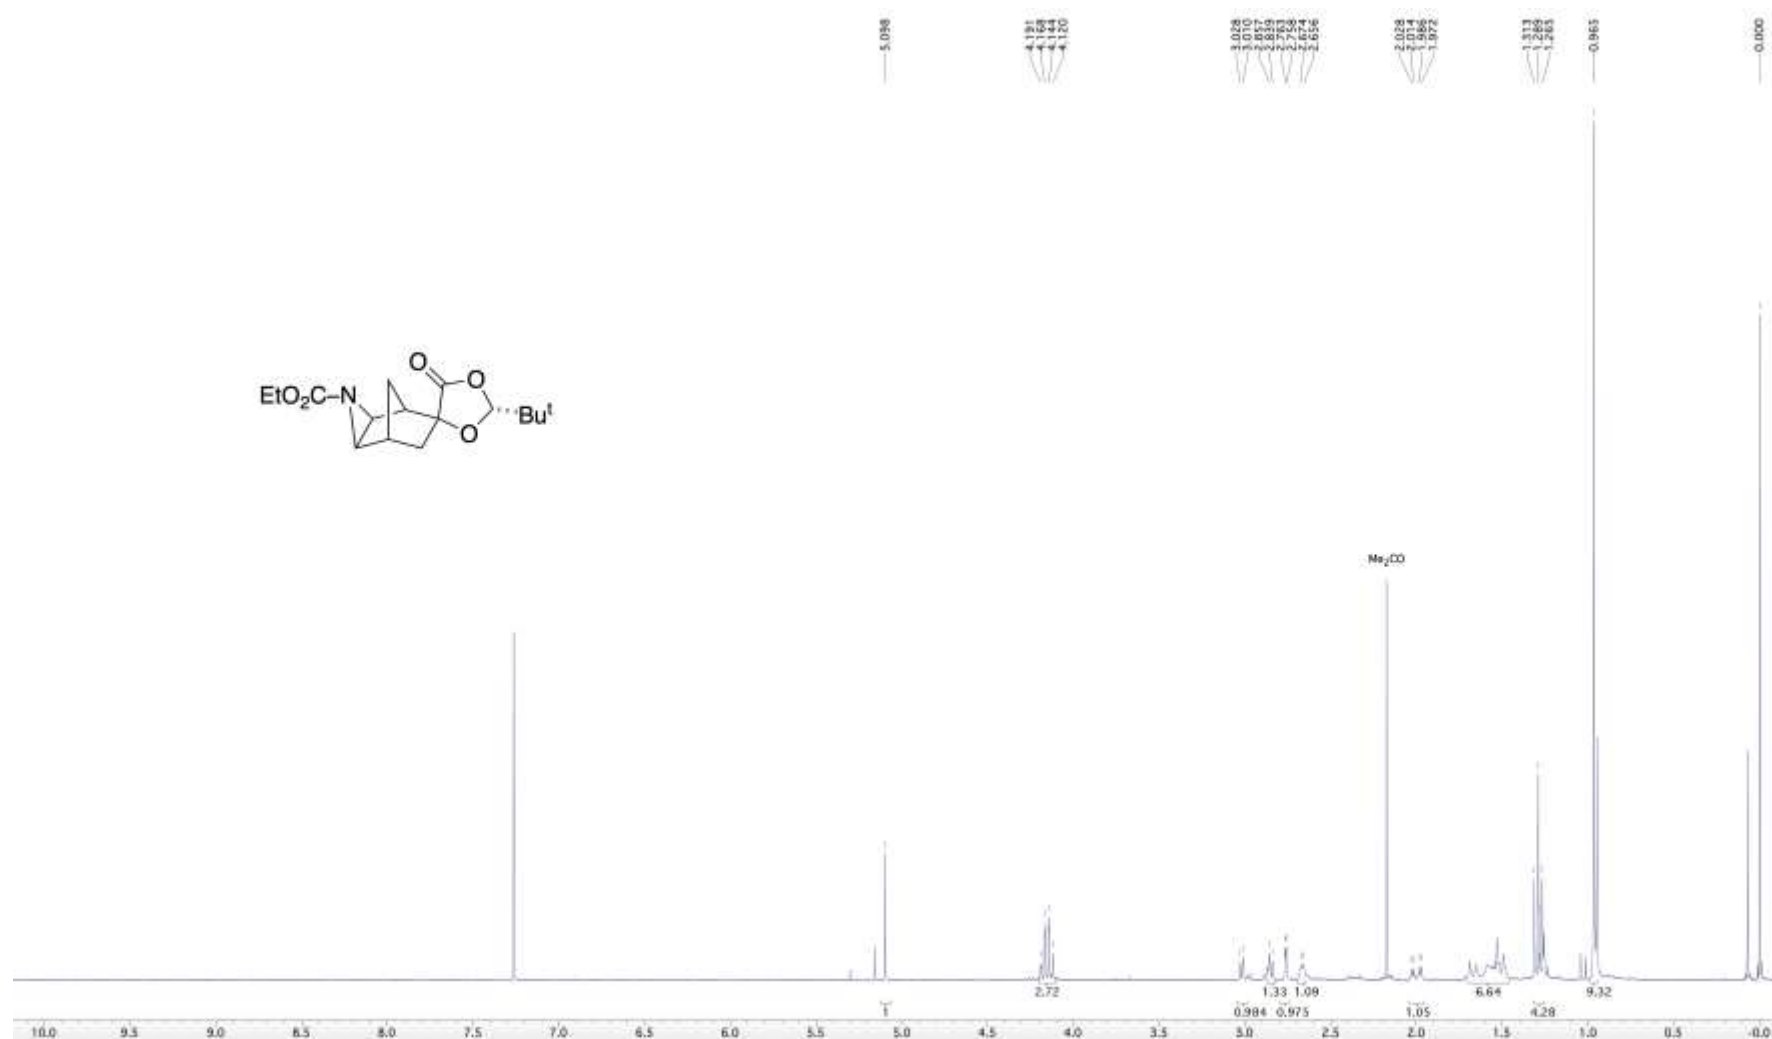

Figure S26. 75 MHz DEPTQ  $^{13}\text{C}$  NMR spectrum of **20**

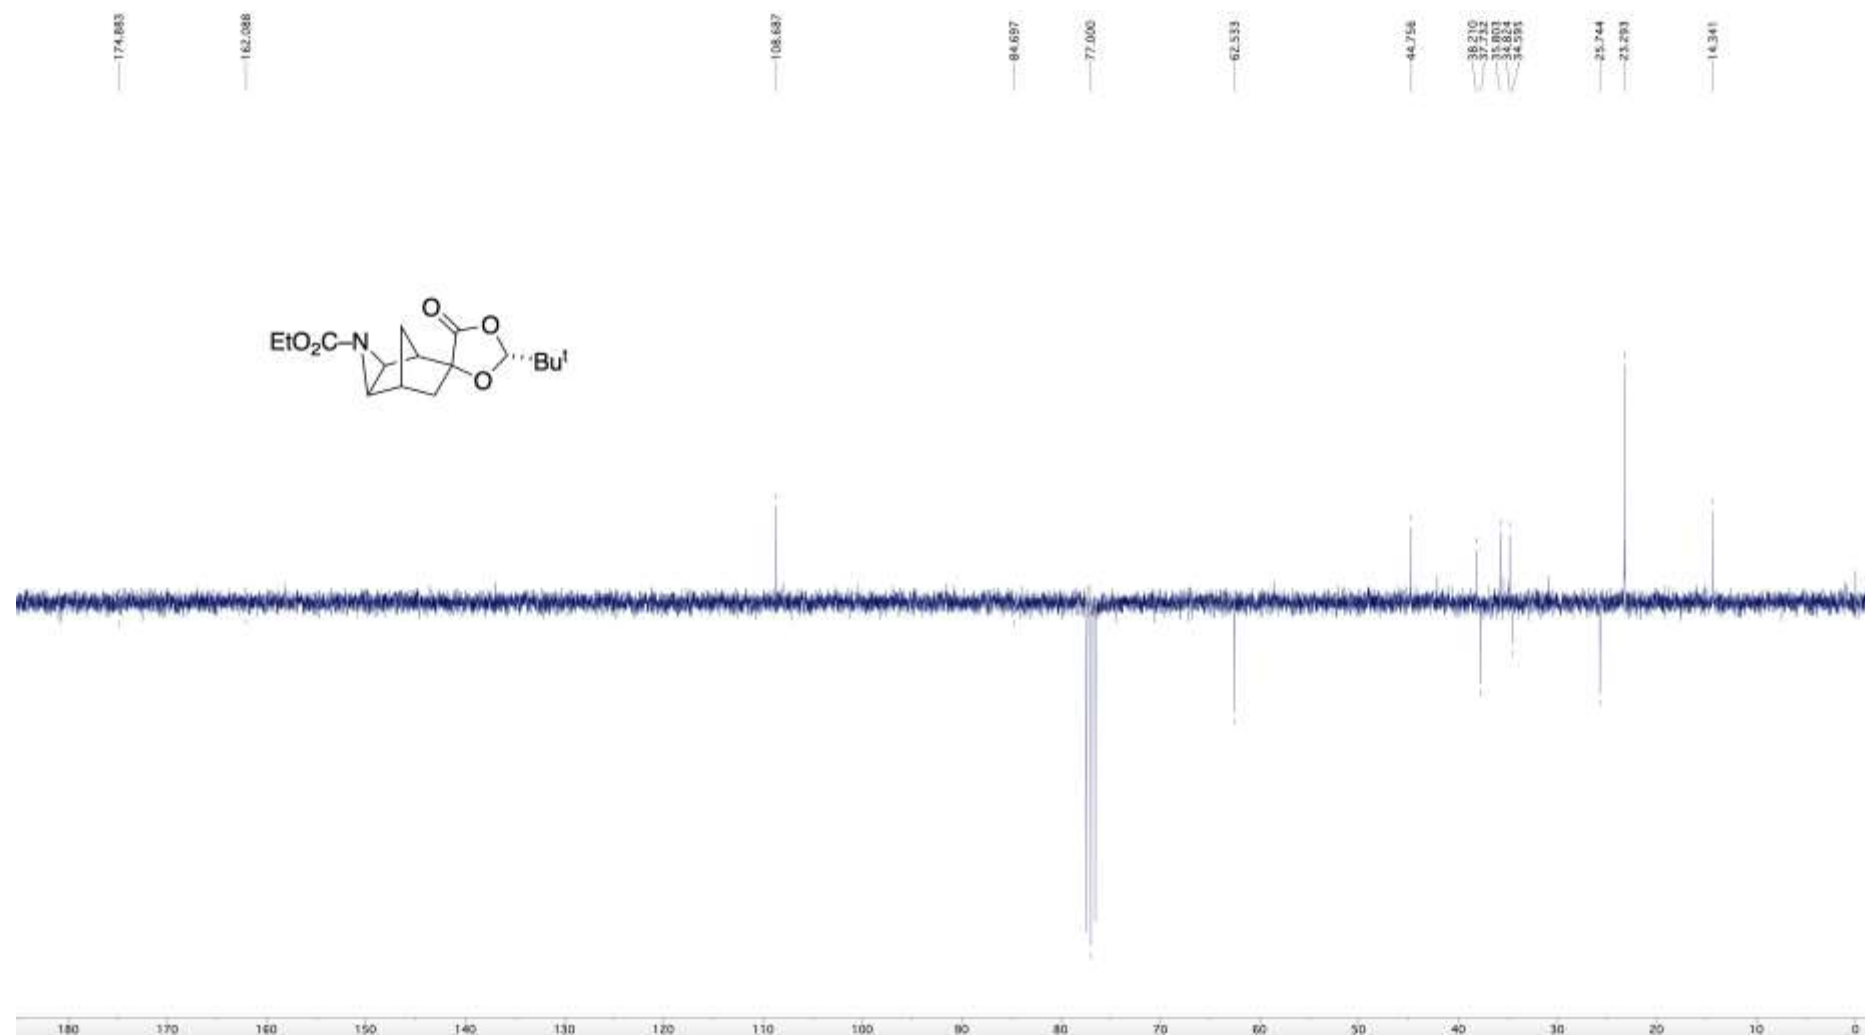

Figure S27. HRMS of **20**

# Elemental Composition Report

Page 1

## Single Mass Analysis

Tolerance = 50.0 PPM / DBE: min = -1.5, max = 40.0

Isotope cluster parameters: Separation = 1.0 Abundance = 1.0%

Monoisotopic Mass, Odd and Even Electron Ions

65 formula(e) evaluated with 10 results within limits (up to 8 closest results for each mass)

Lynn Power

University of St-Andrews  
School of Chemistry GCTOF

12-Sep-2007 11:12:58

LAP160F2\_ci 208 (3.467) Cm (180:210-1:50)

TOF MS CI+  
2.62e5

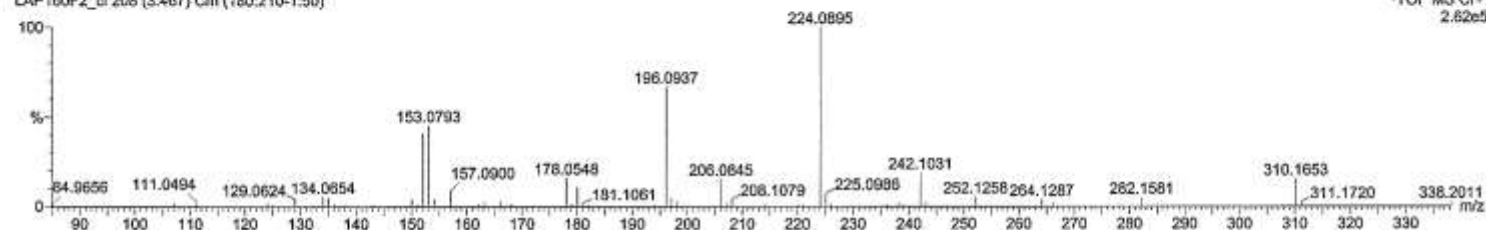

Minimum: -1.5  
Maximum: 200.0 50.0 40.0

| Mass     | Calc. Mass | mDa   | PPM   | DBE  | Score | Formula       |
|----------|------------|-------|-------|------|-------|---------------|
| 310.1653 | 310.1654   | -0.1  | -0.5  | 5.5  | 5     | C16 H24 N O5  |
|          | 310.1681   | -2.8  | -9.1  | 10.0 | 7     | C19 H22 N2 O2 |
|          | 310.1614   | 3.9   | 12.5  | 1.5  | 1     | C11 H24 N3 O7 |
|          | 310.1569   | 8.4   | 27.1  | 10.0 | 8     | C20 H22 O3    |
|          | 310.1740   | -8.7  | -28.1 | 1.0  | 2     | C12 H26 N2 O7 |
|          | 310.1556   | 9.7   | 31.4  | 10.5 | 6     | C18 H20 N3 O2 |
|          | 310.1767   | -11.4 | -36.7 | 5.5  | 4     | C15 H24 N3 O4 |
|          | 310.1529   | 12.4  | 40.1  | 6.0  | 3     | C15 H22 N2 O5 |

Figure S28. 300 MHz  $^1\text{H}$  NMR spectrum of **21**

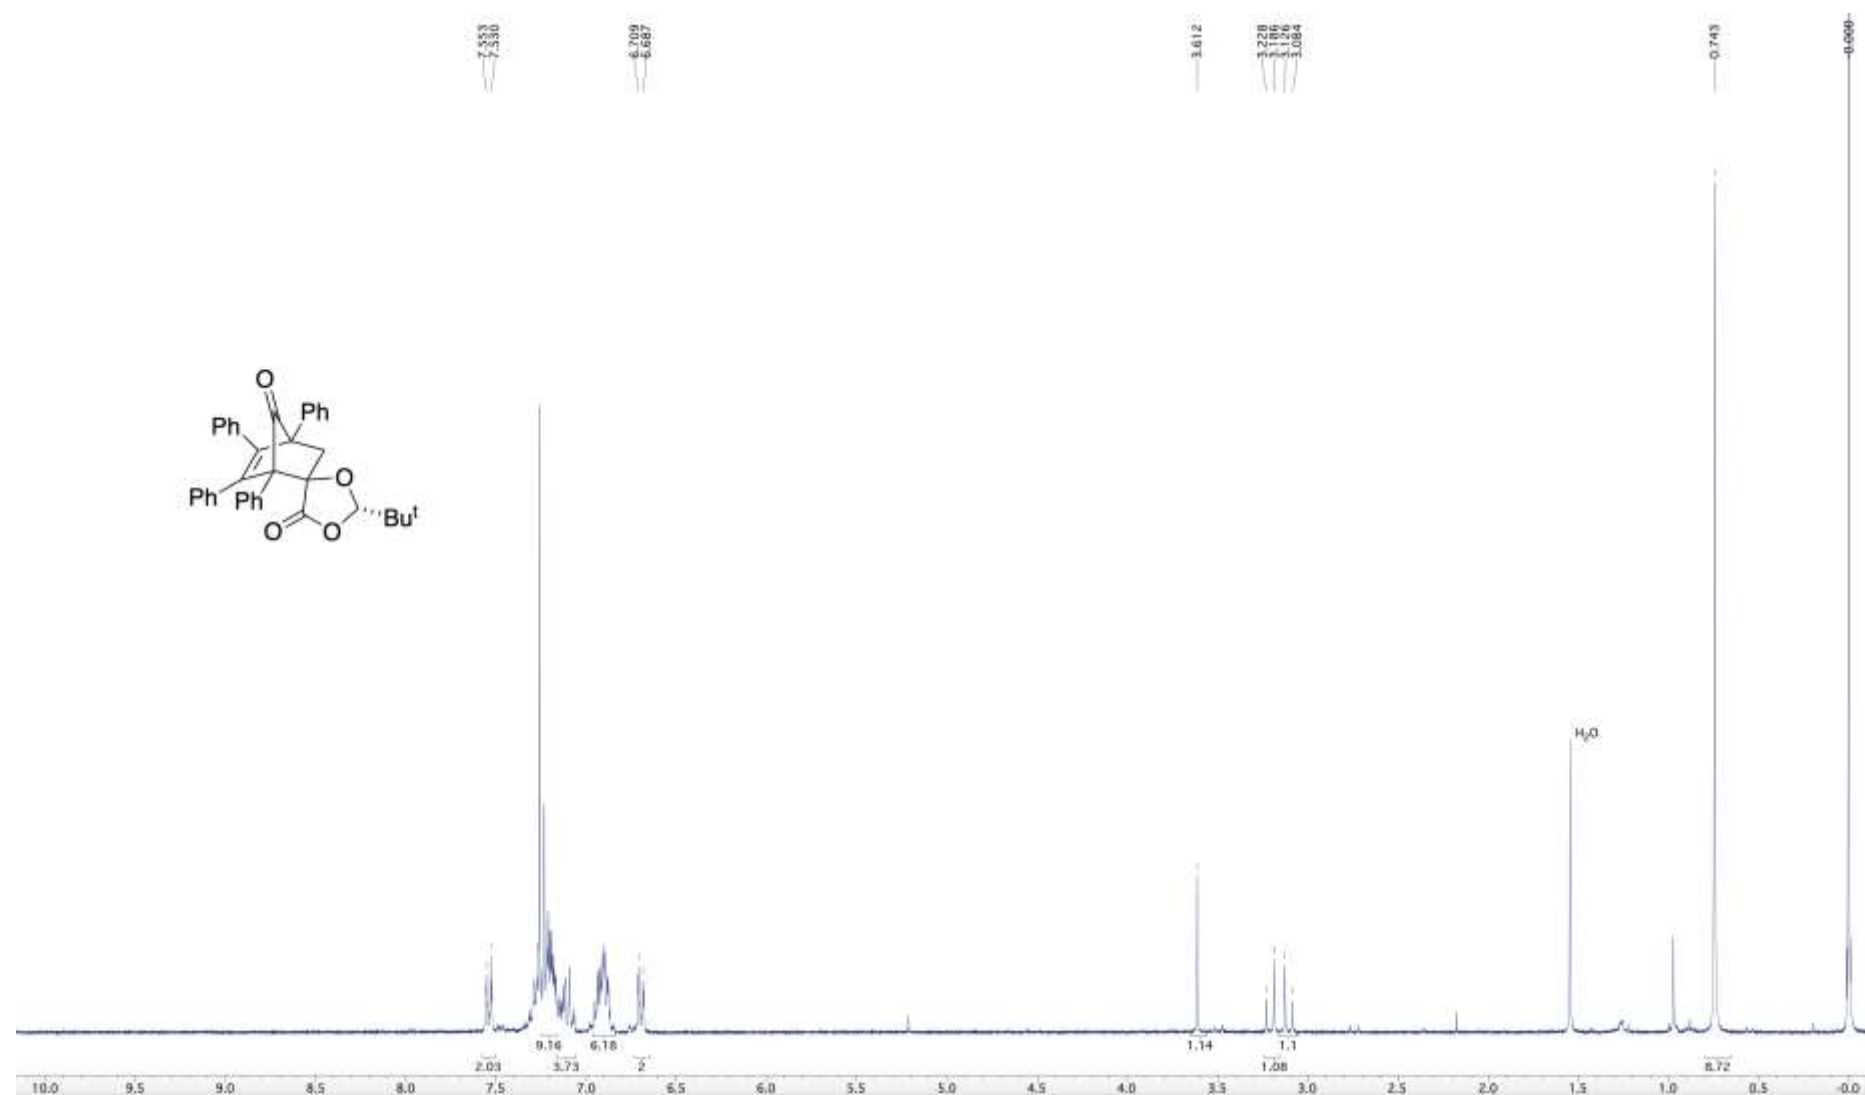

Figure S29. 75 MHz DEPTQ  $^{13}\text{C}$  NMR spectrum of **21**

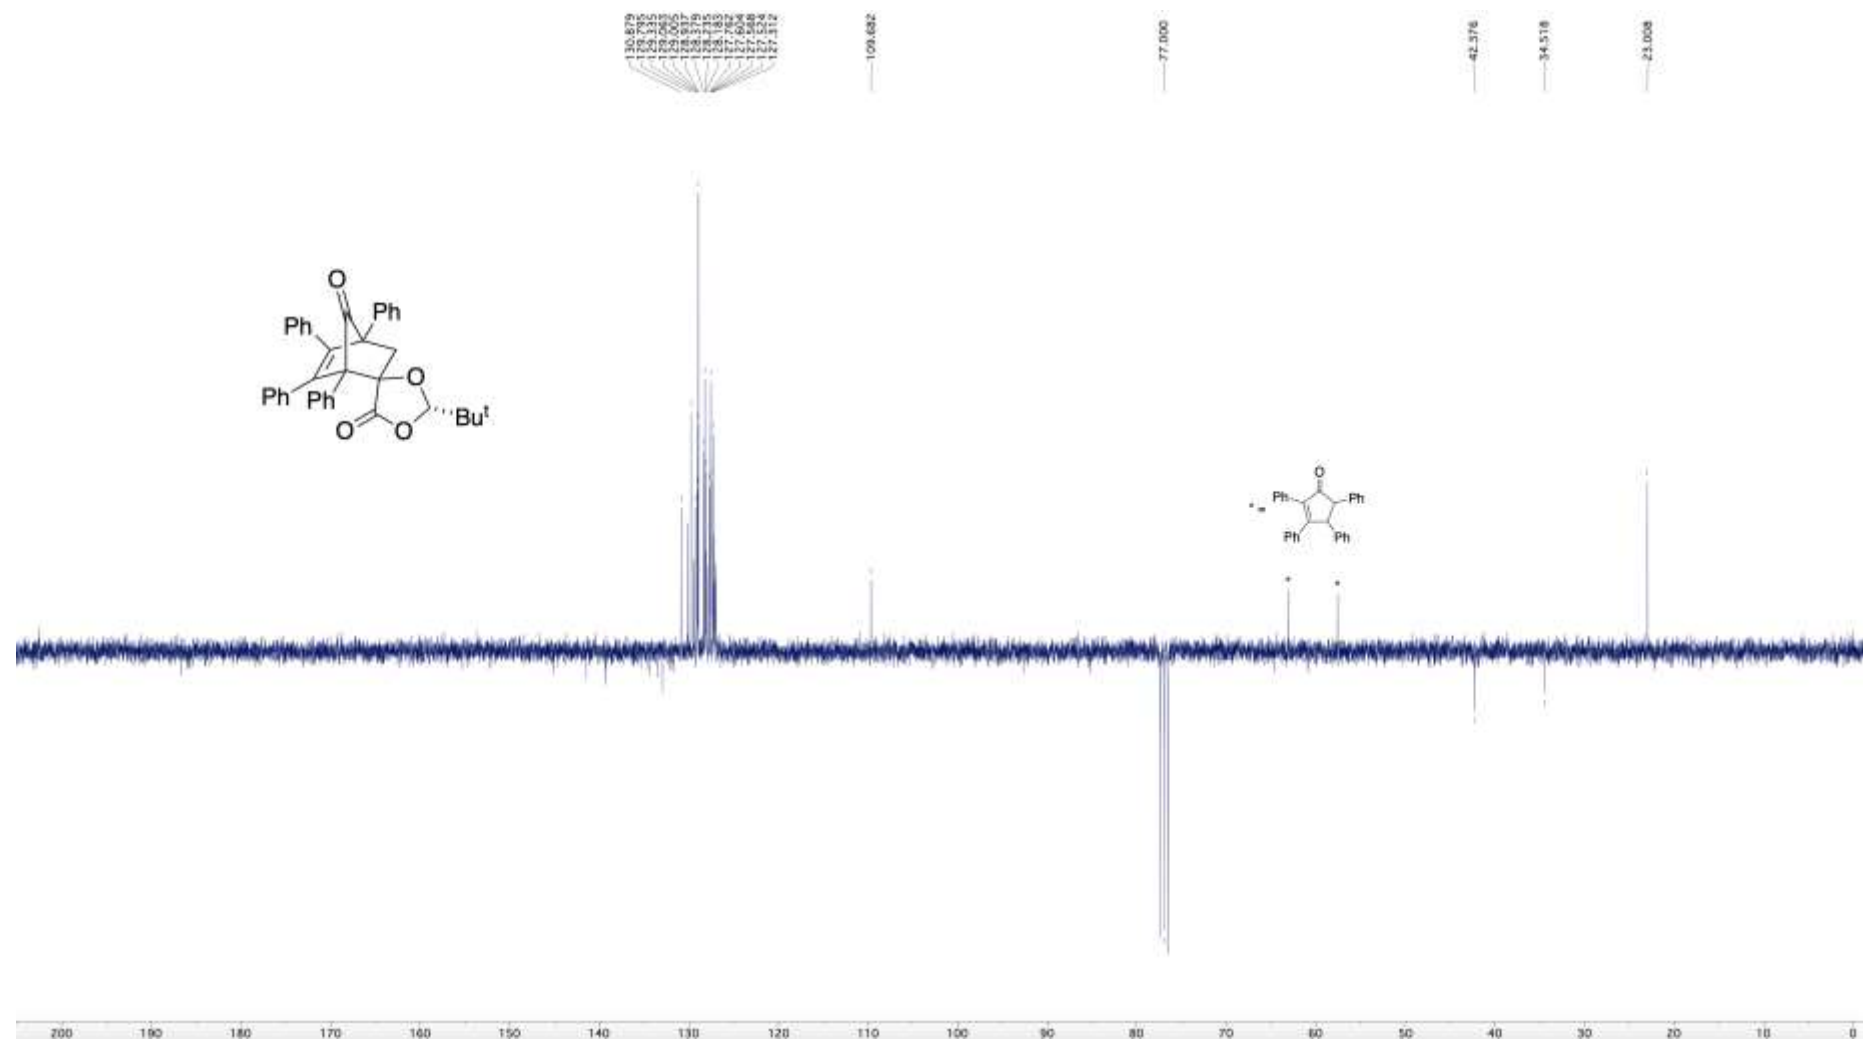

Figure S30. IR spectrum of **21**

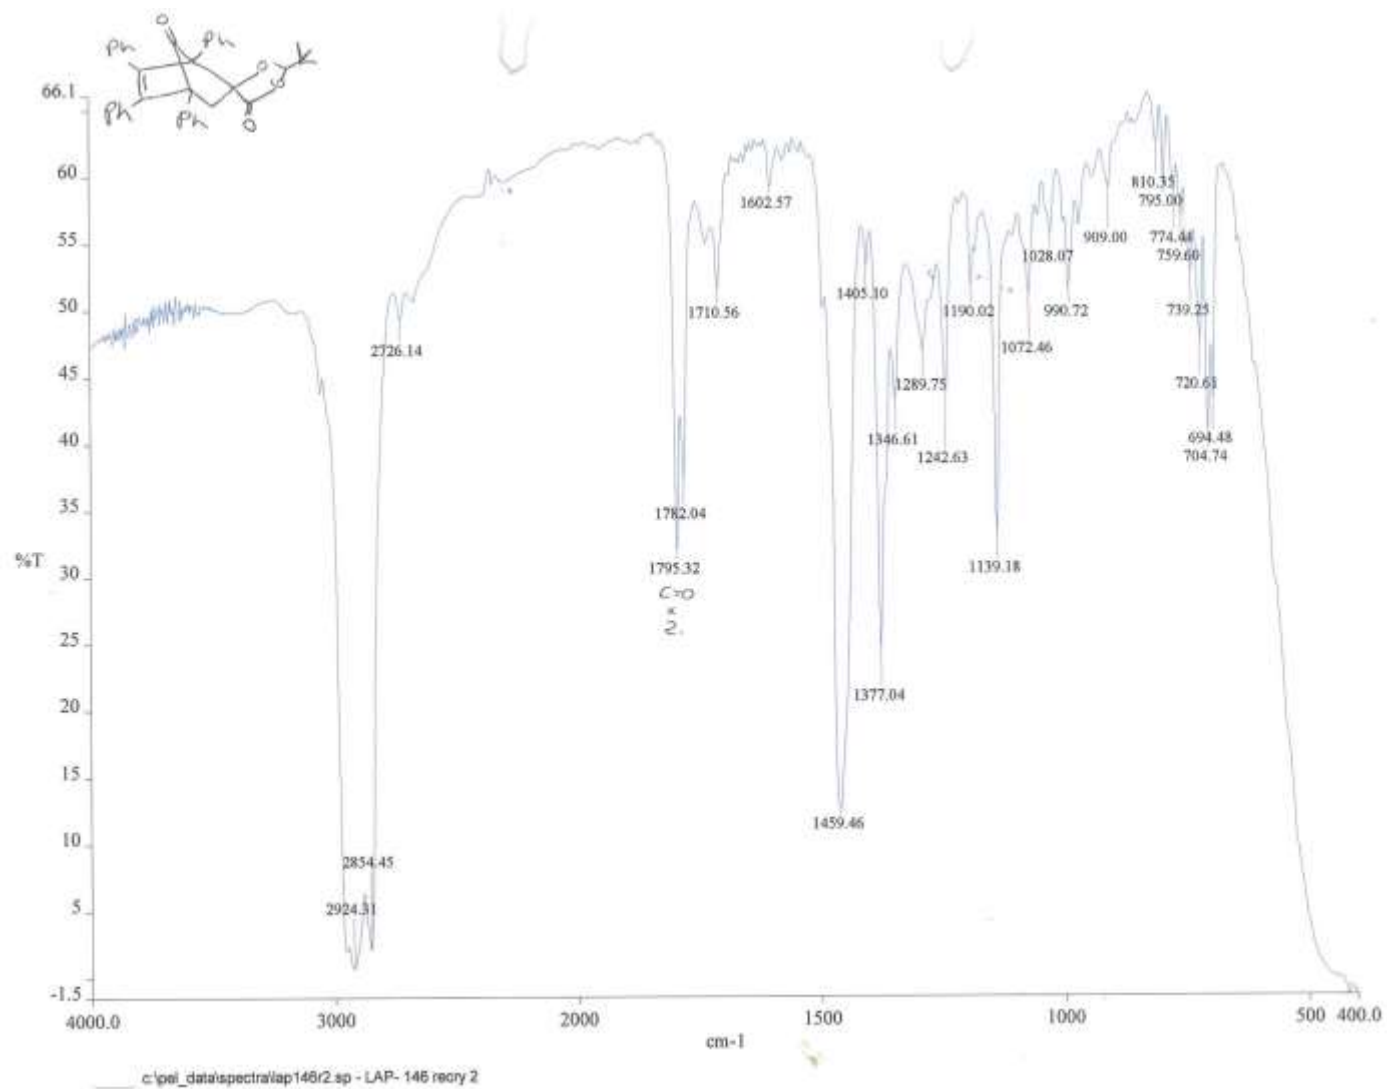

Figure S31. HRMS of 21

## Elemental Composition Report

Page 1

### Single Mass Analysis

Tolerance = 50.0 PPM / DBE: min = -1.5, max = 40.0

Isotope cluster parameters: Separation = 1.0 Abundance = 1.0%

Monoisotopic Mass, Odd and Even Electron Ions

27 formula(e) evaluated with 5 results within limits (up to 8 closest results for each mass)

Lynn Power

University of St-Andrews  
School of Chemistry LCTOF

10-Mar-2006 10:24:05

LAP146fr6\_14am3 21 (0.402) AM (Cen,2, 80.00, Ar,7000.0,556.28,0.76,LS 5); Cm (21:30)

1: TOF MS ES+  
1.20e3

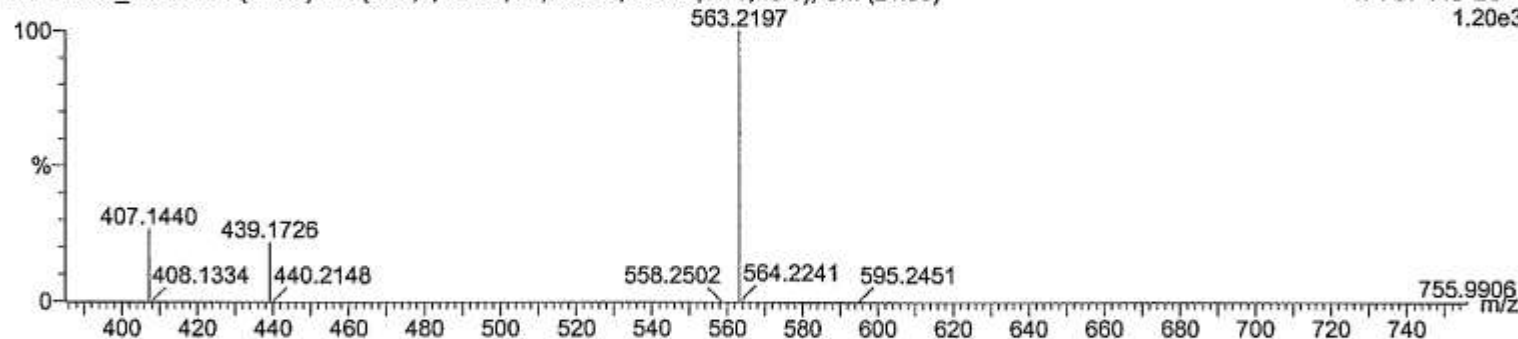

Minimum: -1.5

Maximum: 200.0 50.0 40.0

| Mass     | Calc. Mass | mDa   | PPM   | DBE  | Score | Formula       |
|----------|------------|-------|-------|------|-------|---------------|
| 563.2197 | 563.2198   | -0.2  | -0.3  | 21.5 | 3     | C37 H32 O4 Na |
|          | 563.2222   | -2.6  | -4.6  | 24.5 | 4     | C39 H31 O4    |
|          | 563.1987   | 21.0  | 37.2  | 26.5 | 5     | C40 H28 O2 Na |
|          | 563.2410   | -21.3 | -37.8 | 16.5 | 1     | C34 H36 O6 Na |
|          | 563.2434   | -23.7 | -42.1 | 19.5 | 2     | C36 H35 O6    |



Figure S32. 300 MHz  $^1\text{H}$  NMR spectrum of **22a**

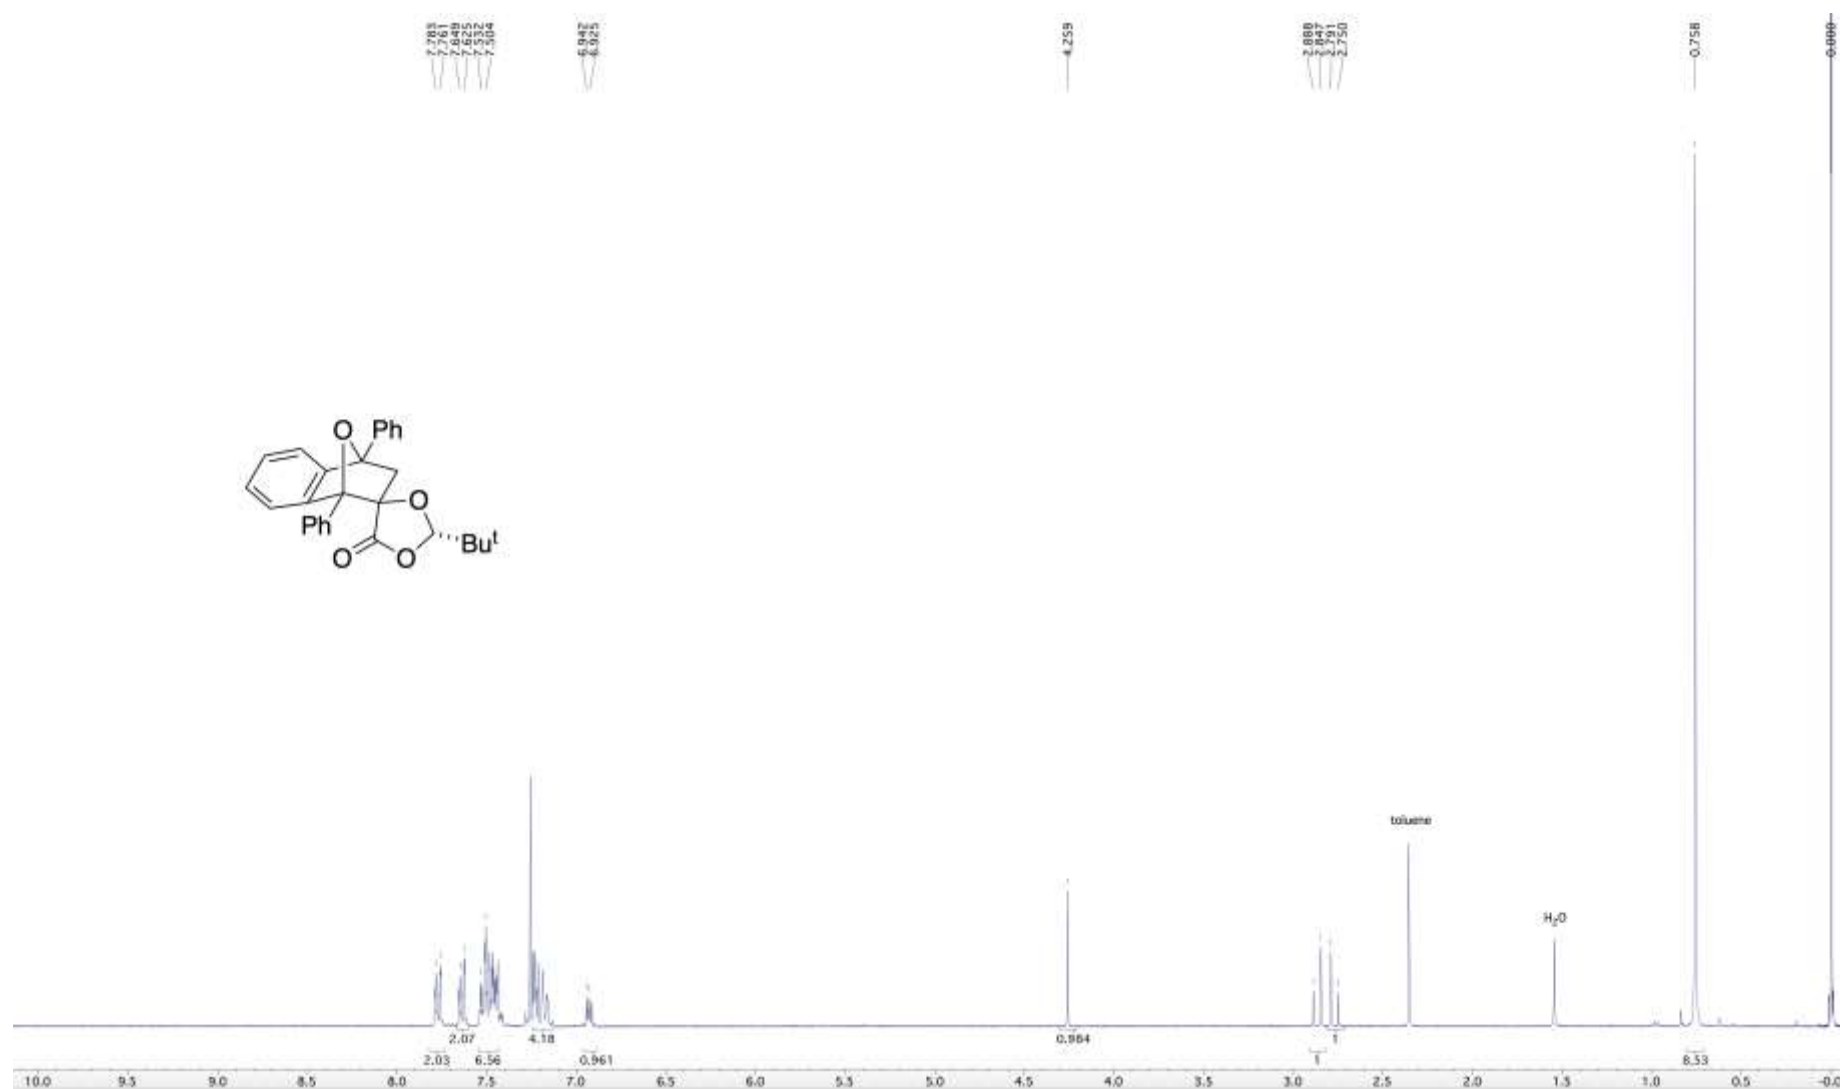

Figure S33. 75 MHz DEPTQ  $^{13}\text{C}$  NMR spectrum of **22a**

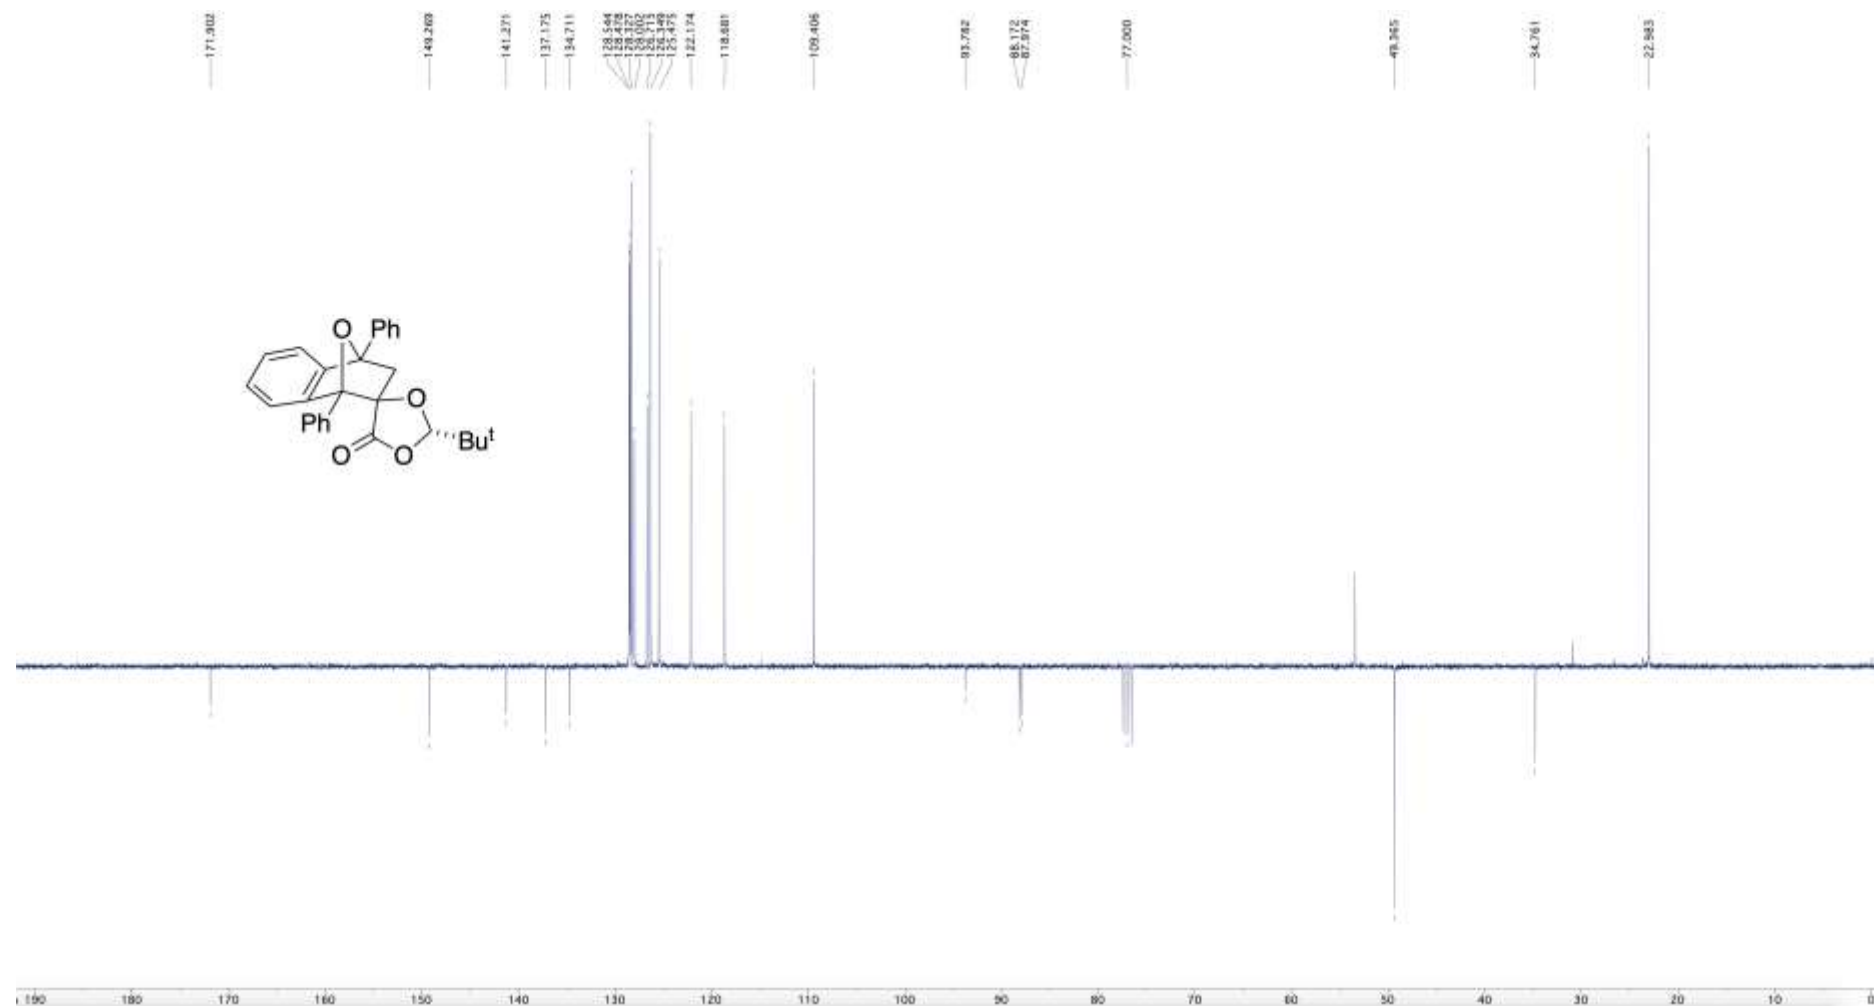

Figure S34. IR spectrum of **22a**

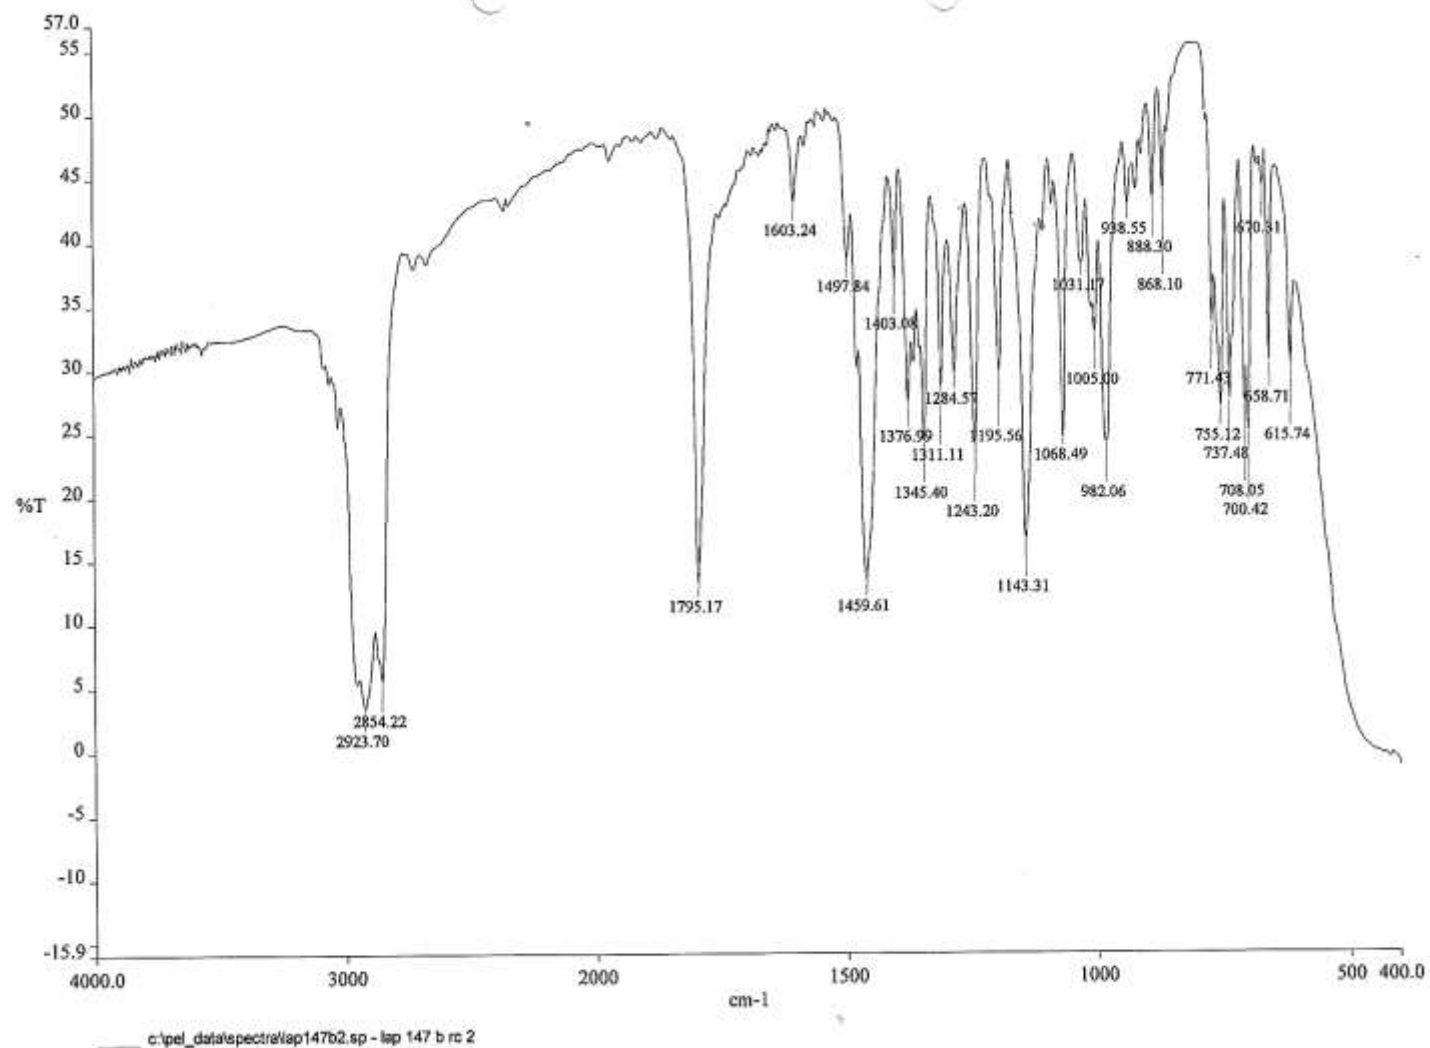

Figure S35. 300 MHz  $^1\text{H}$  NMR spectrum of **24**

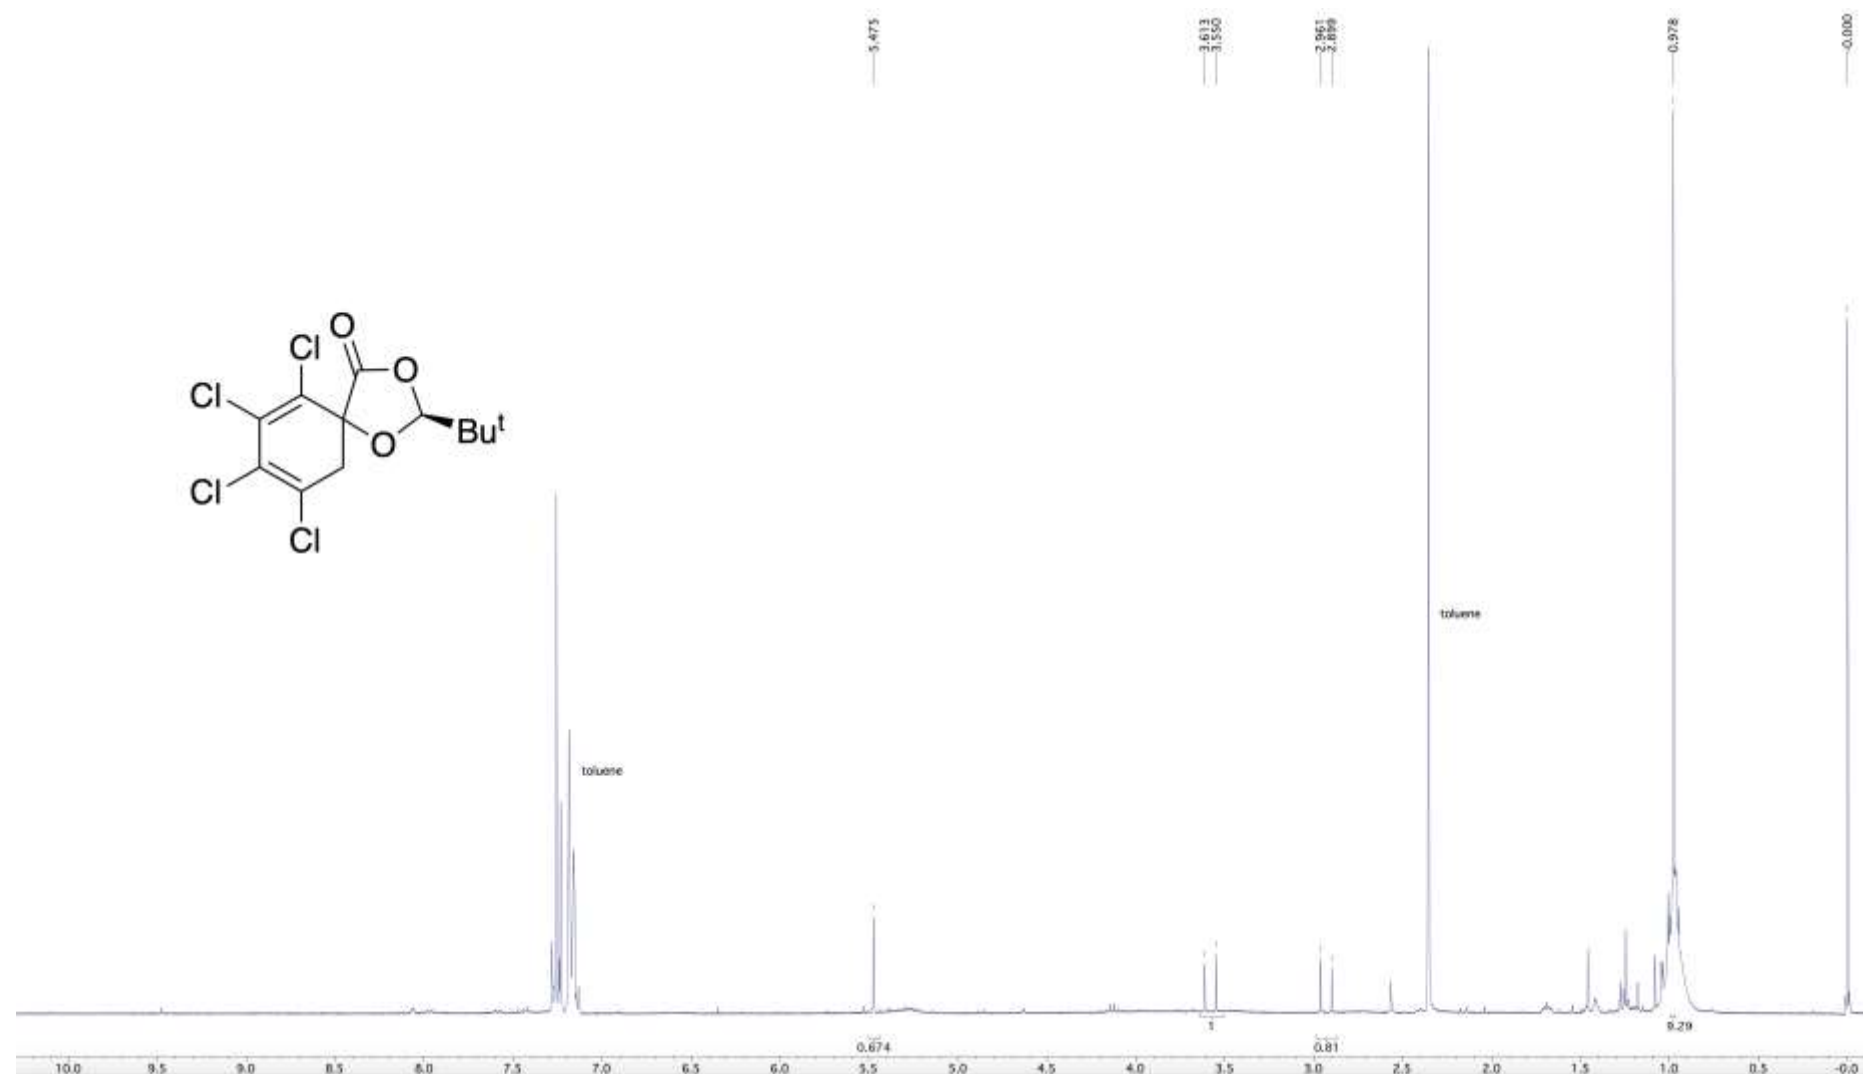

Figure S36. 75 MHz DEPTQ  $^{13}\text{C}$  NMR spectrum of **24**

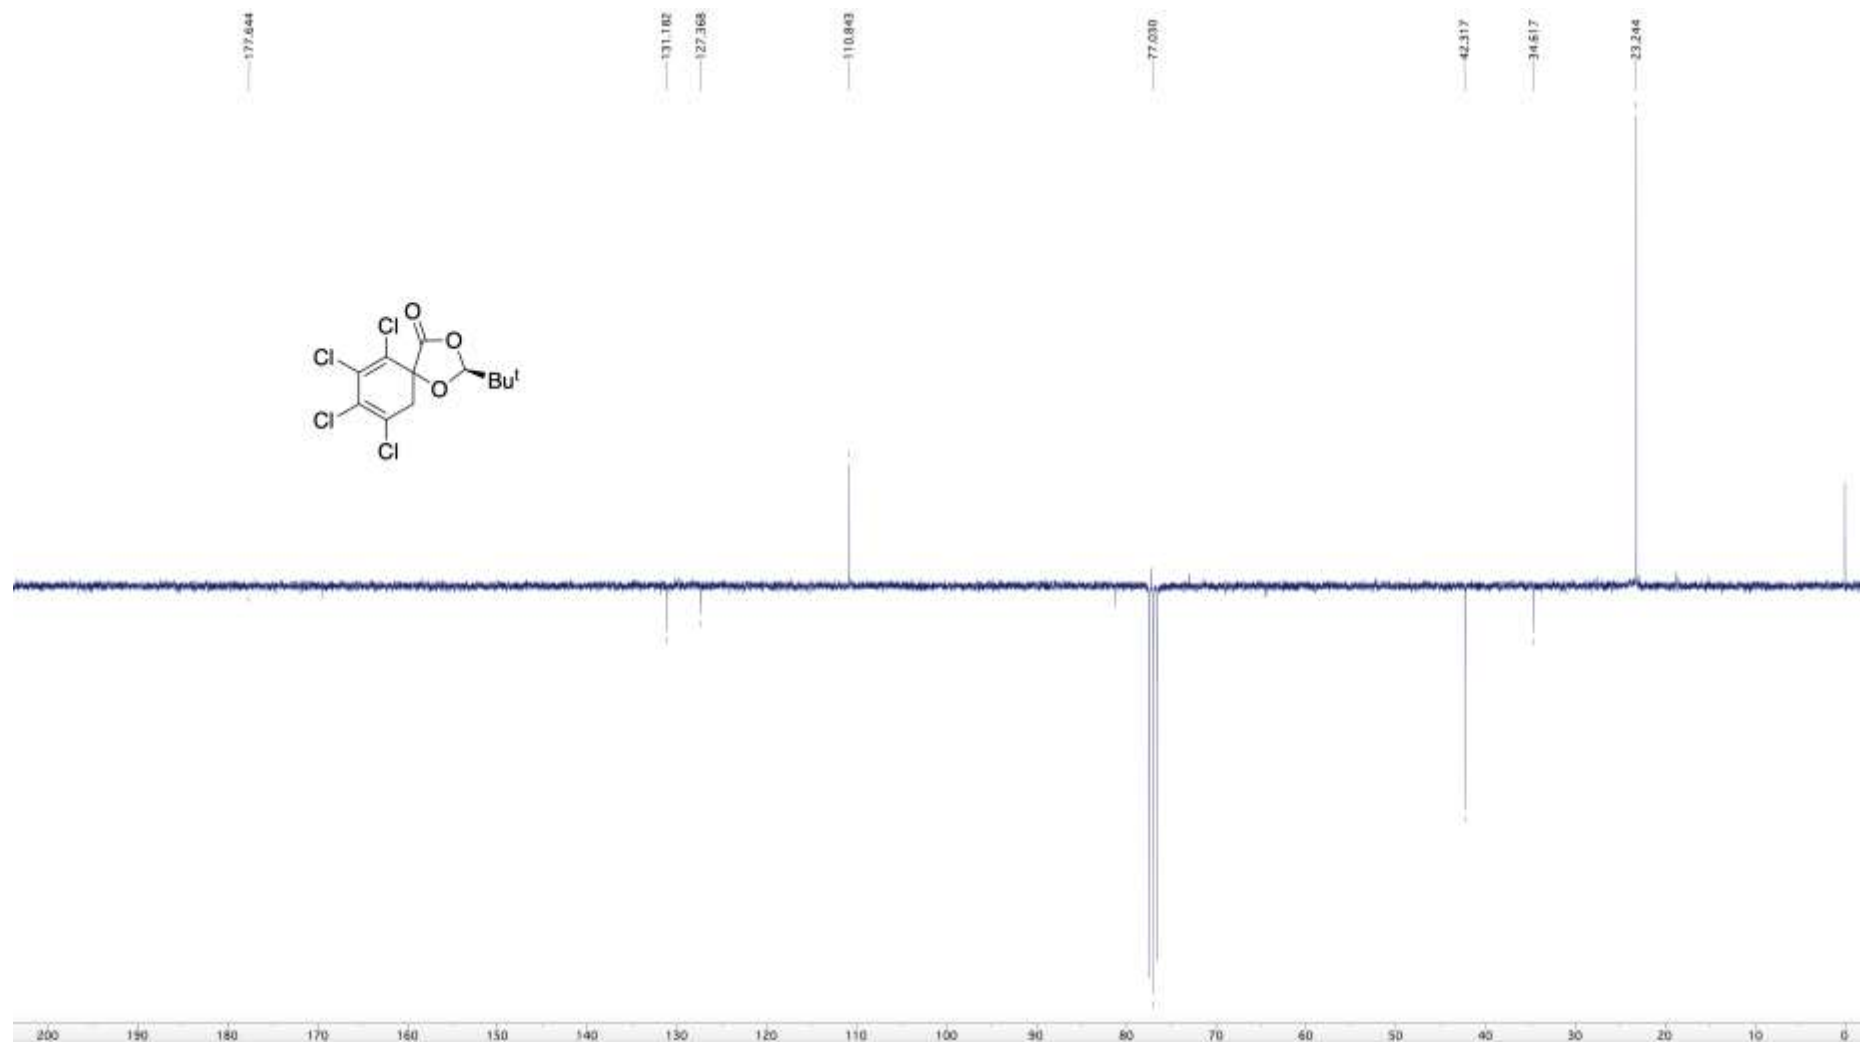

Figure 37. IR spectrum of **24**

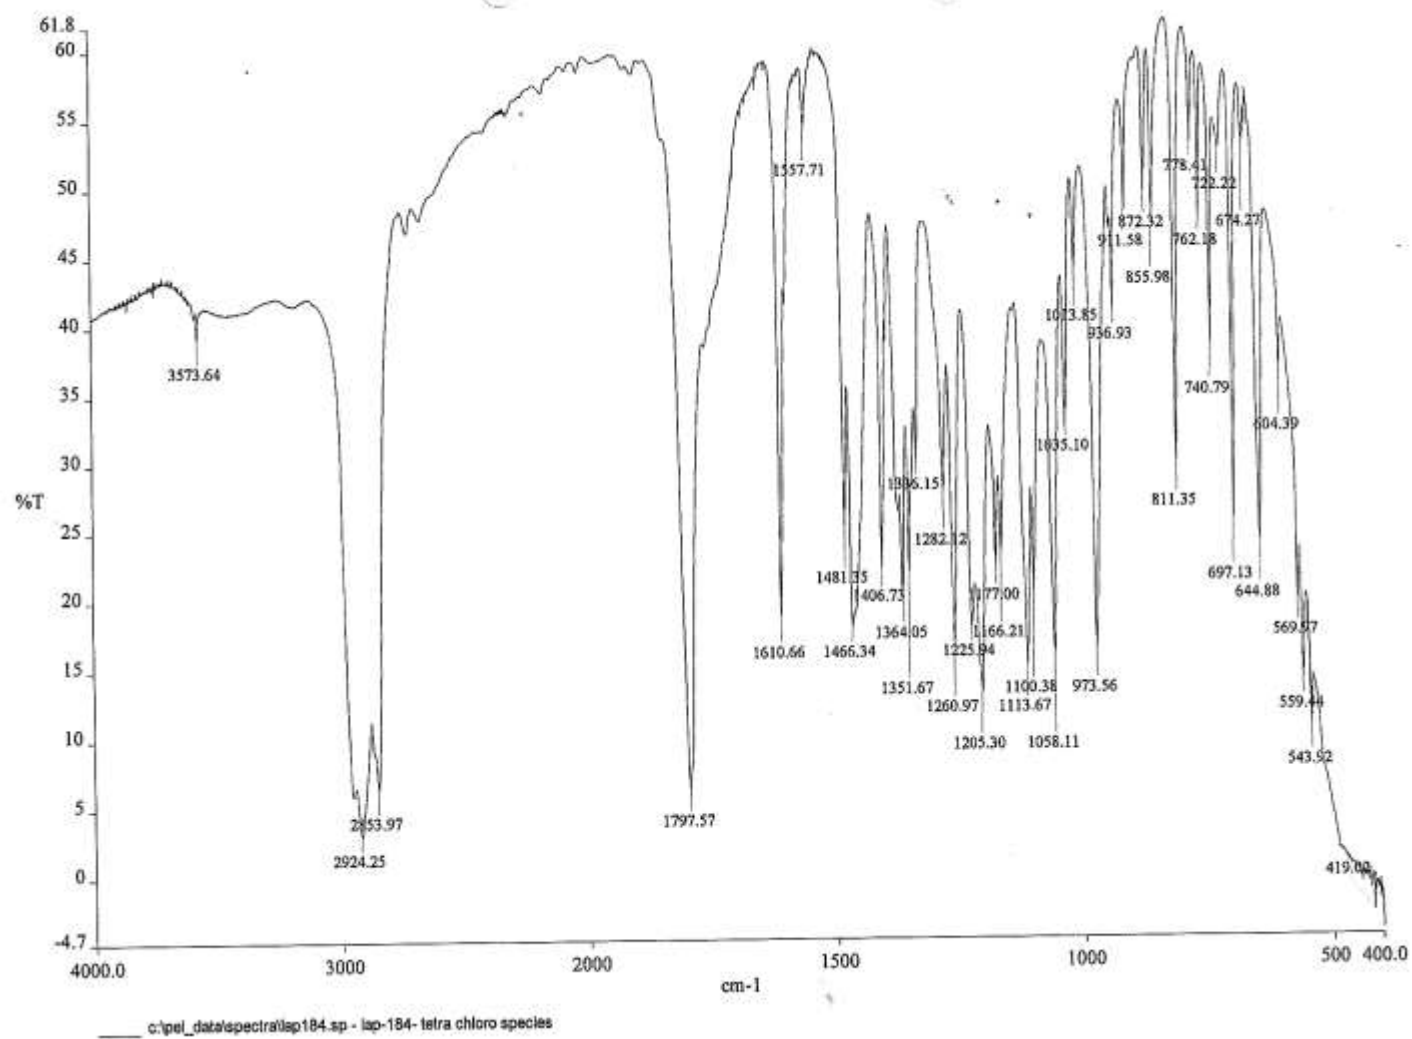

Figure S38. 300 MHz  $^1\text{H}$  NMR spectrum of **25**

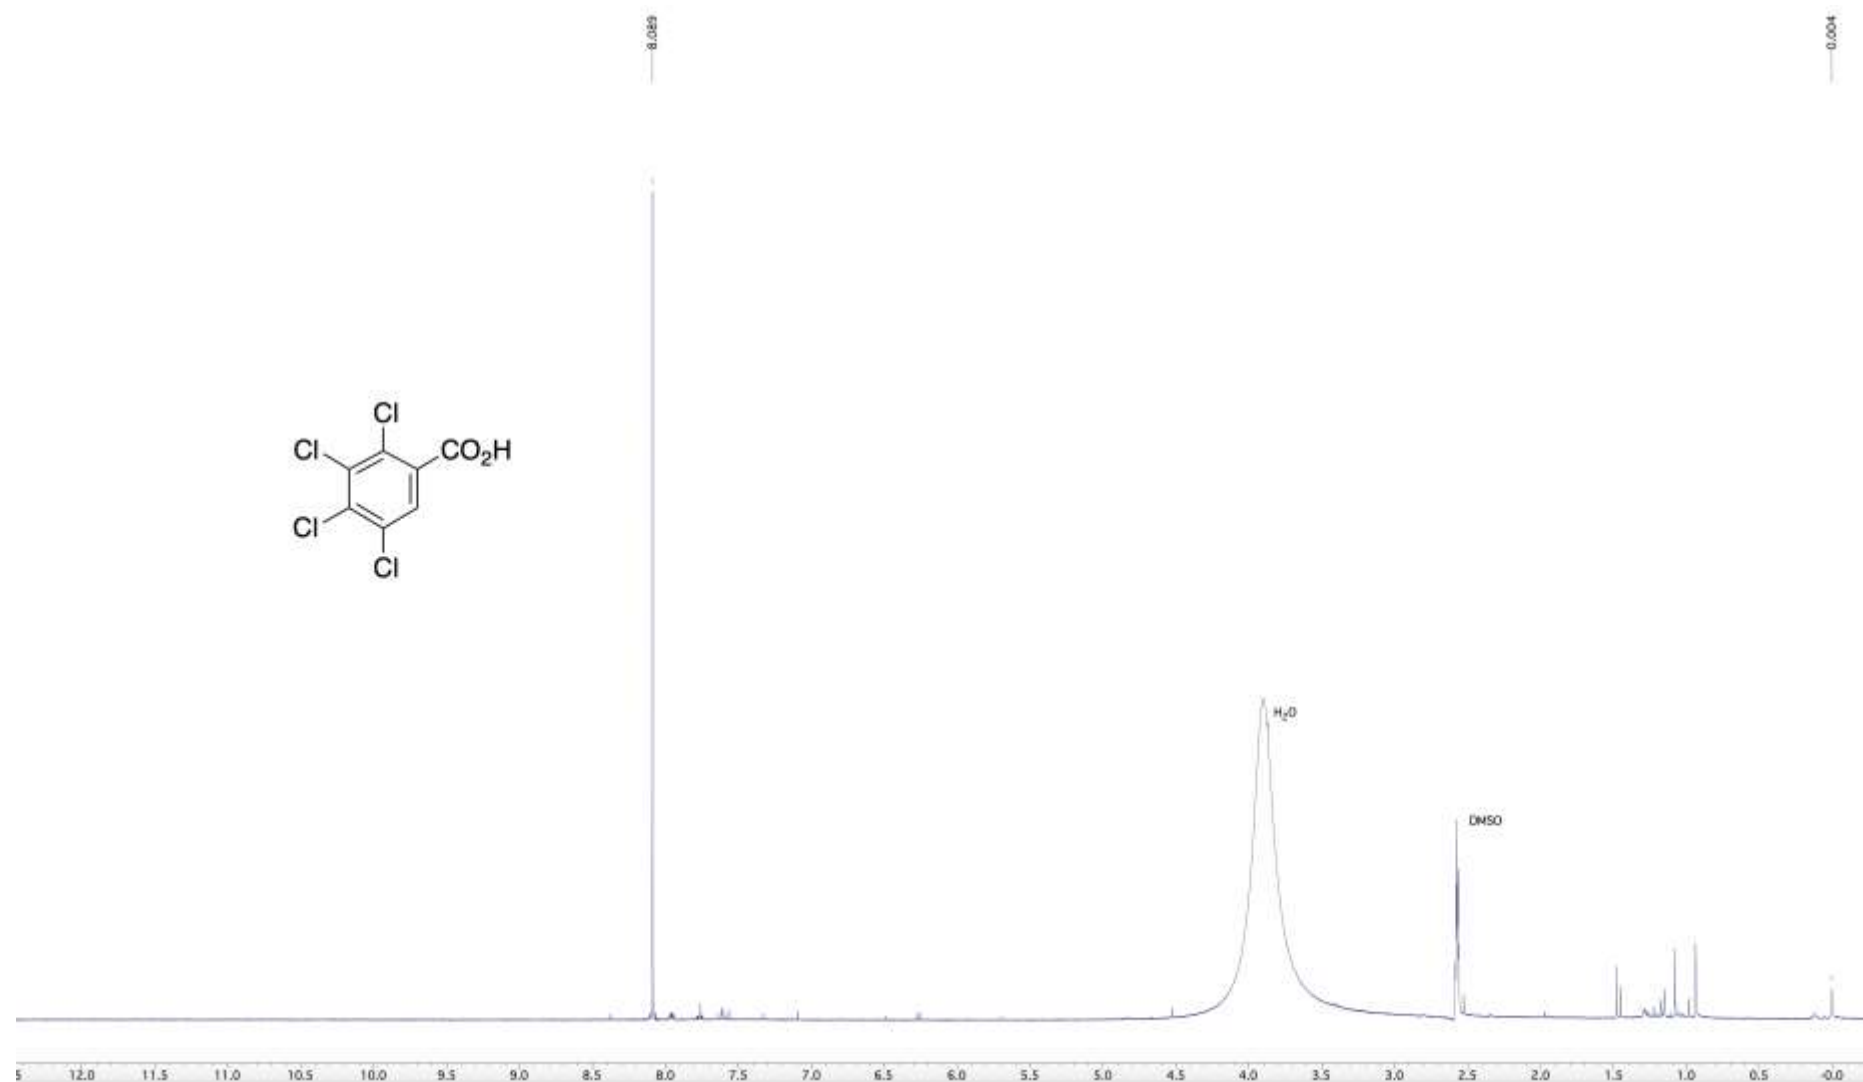

Figure S39. 75 MHz DEPTQ  $^{13}\text{C}$  NMR spectrum of **25**

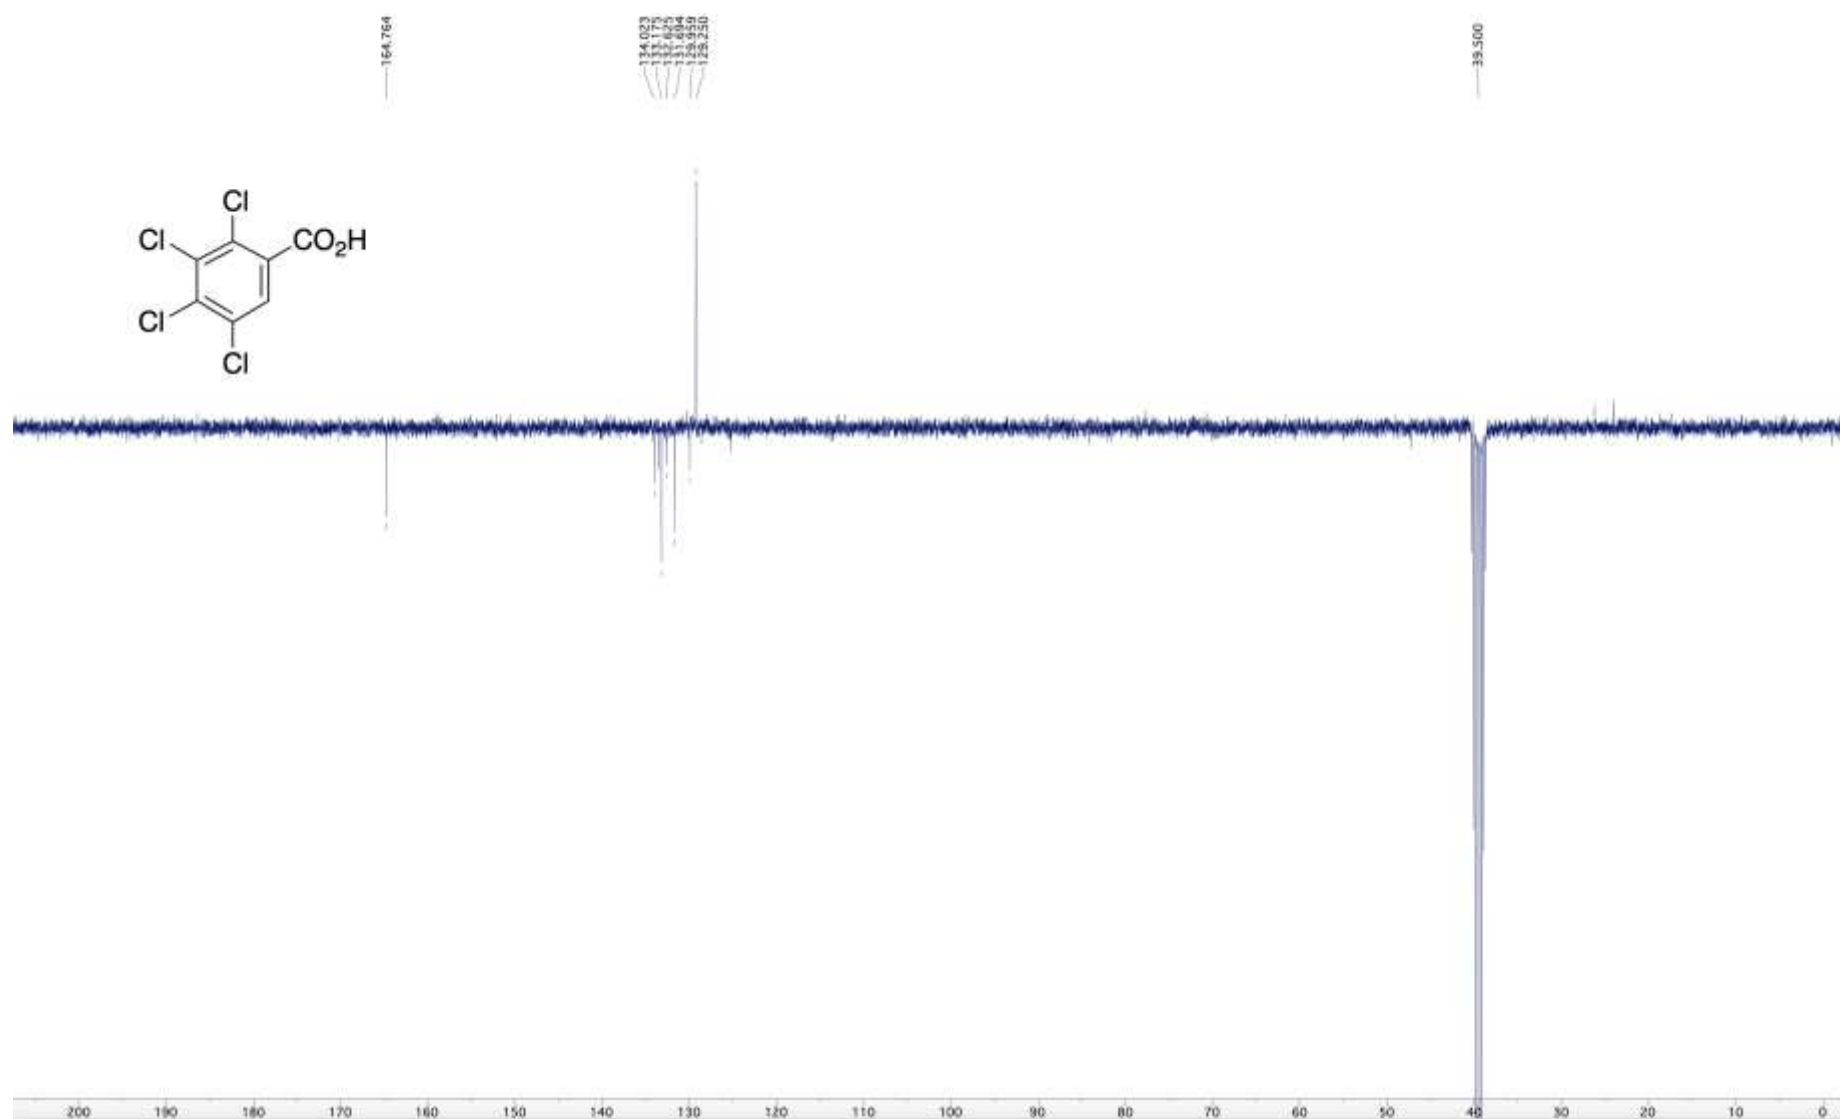



Figure S40. 300 MHz  $^1\text{H}$  NMR spectrum of **27**

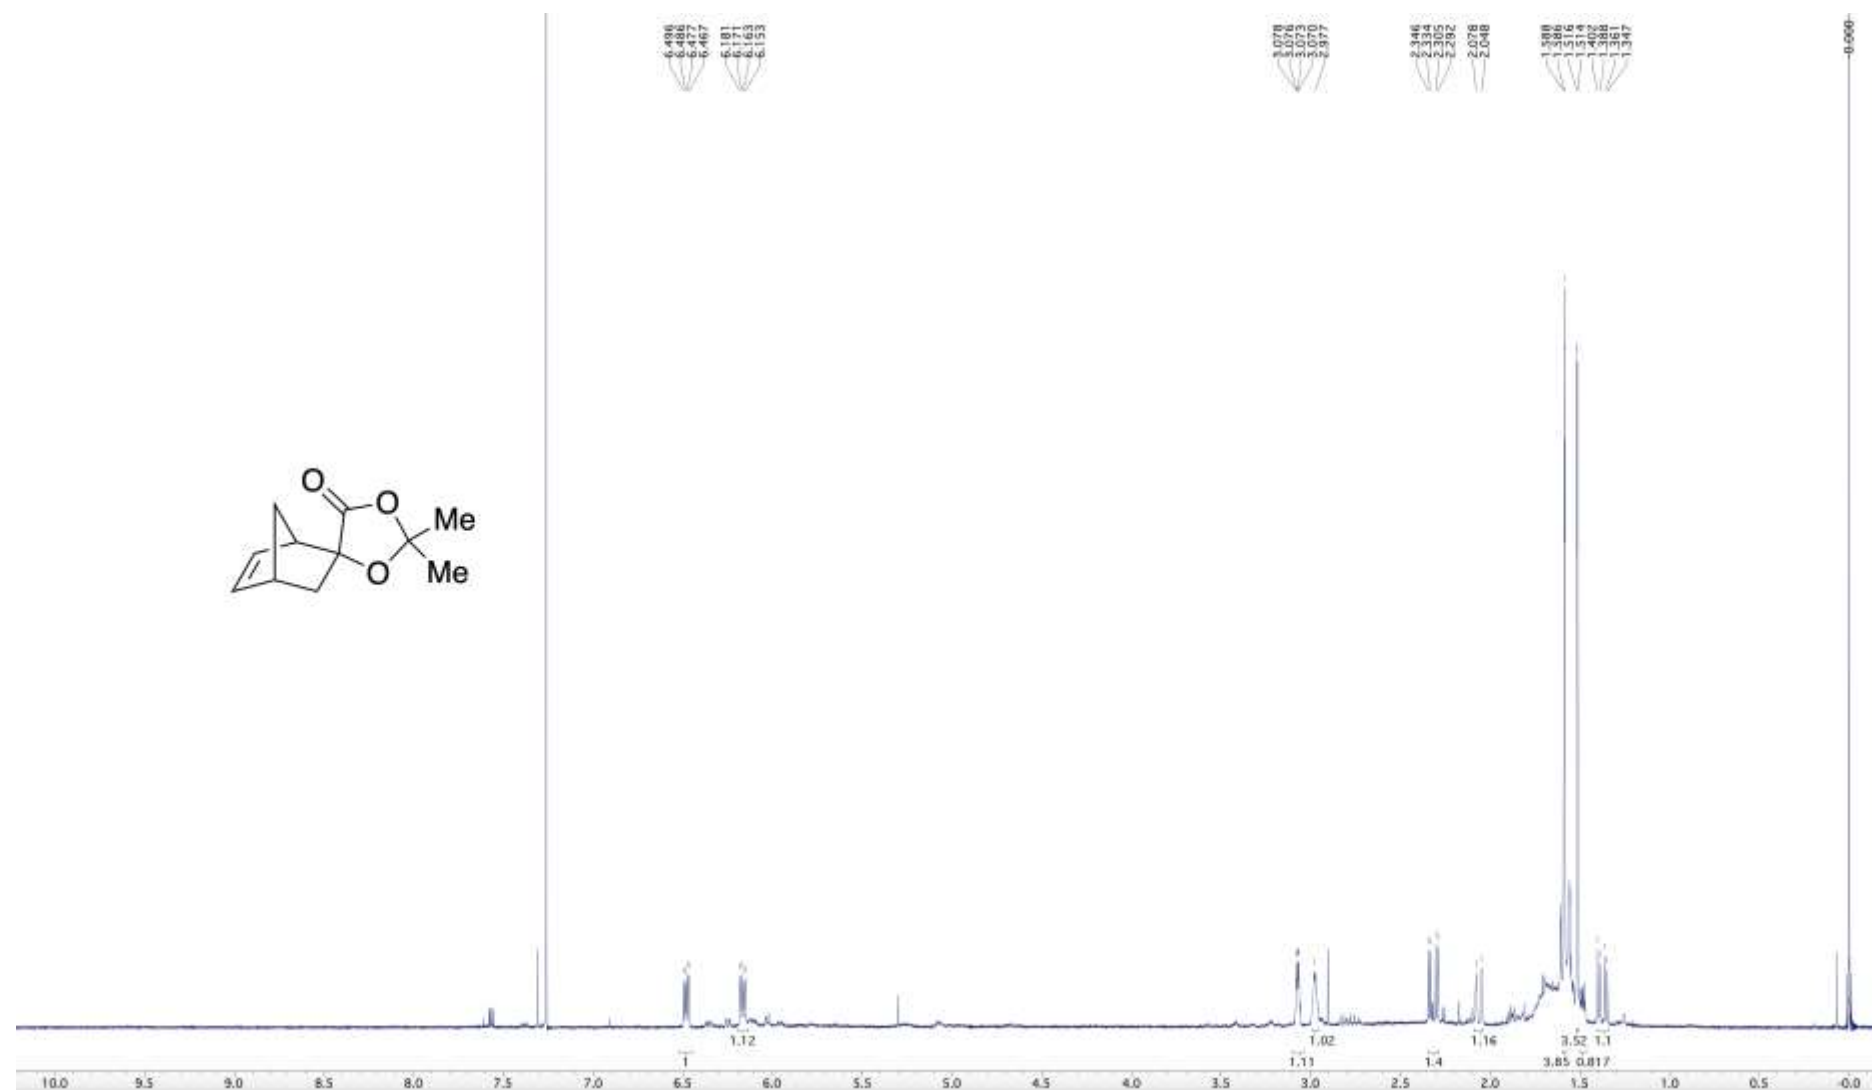

Figure S41. 75 MHz DEPTQ  $^{13}\text{C}$  NMR spectrum of **27**

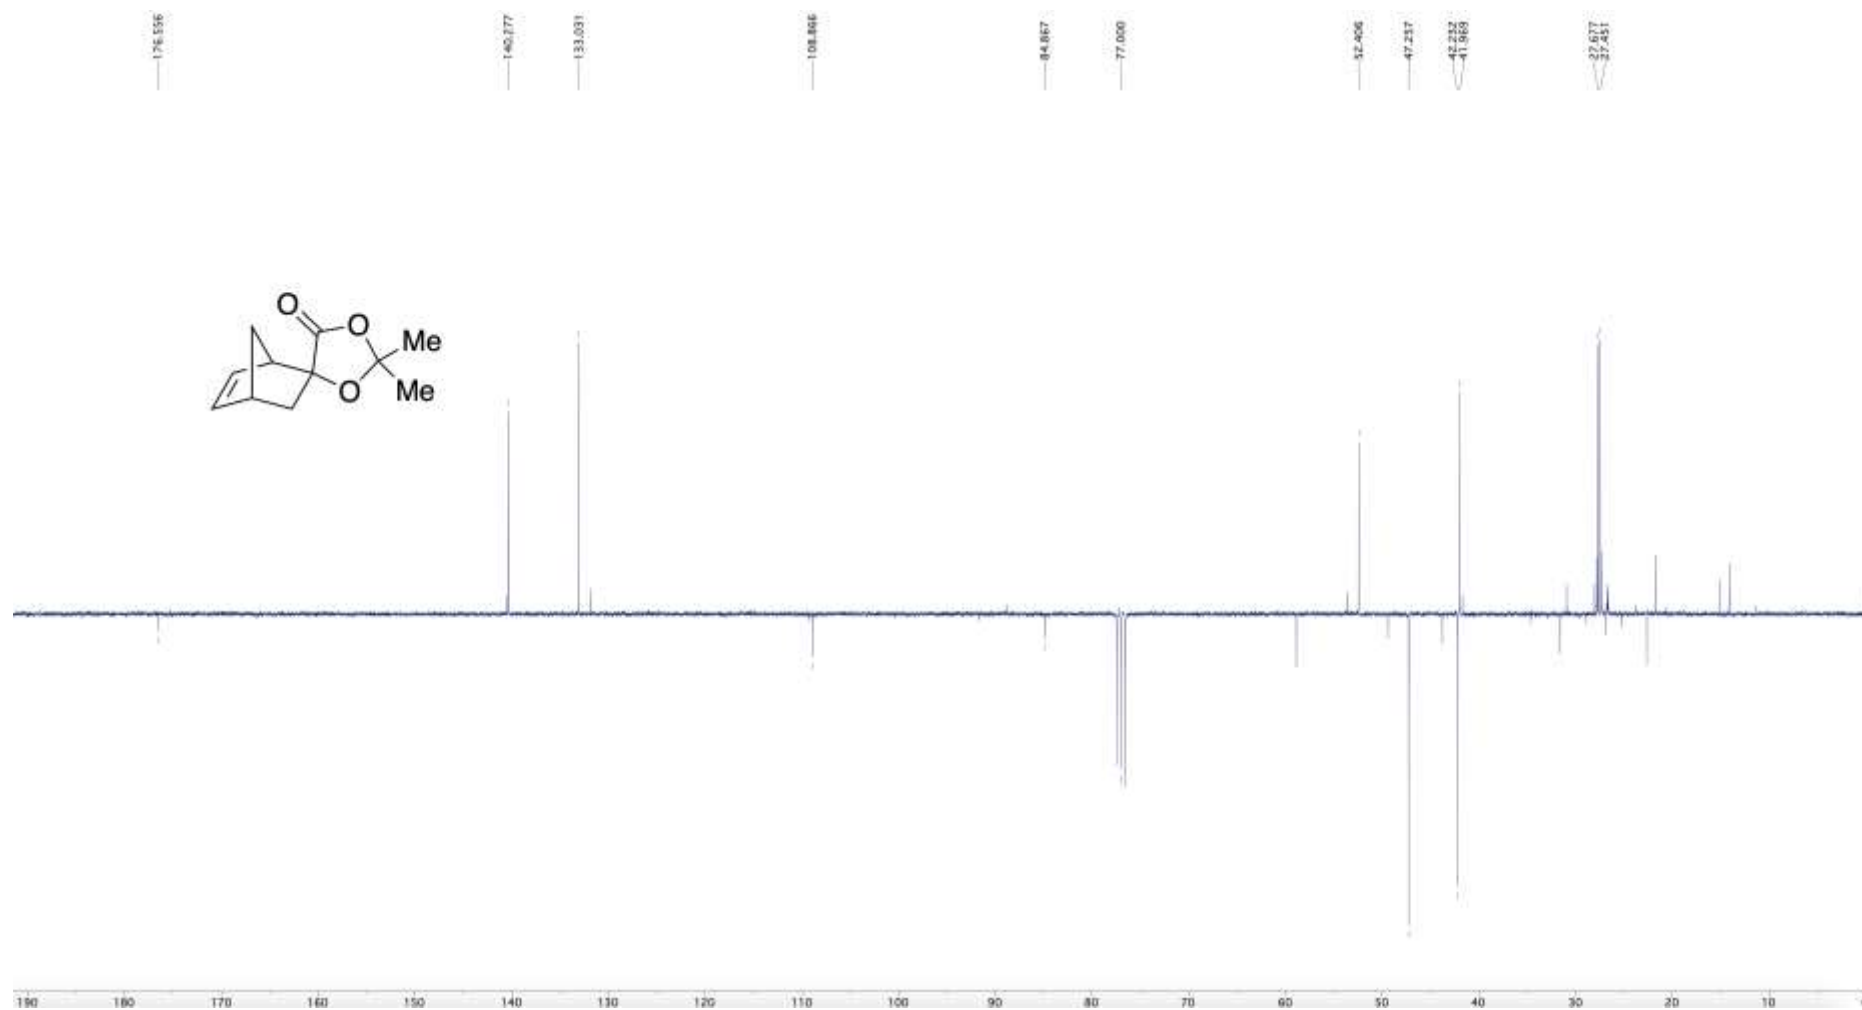

Figure S42. 300 MHz  $^1\text{H}$  NMR spectrum of **28**

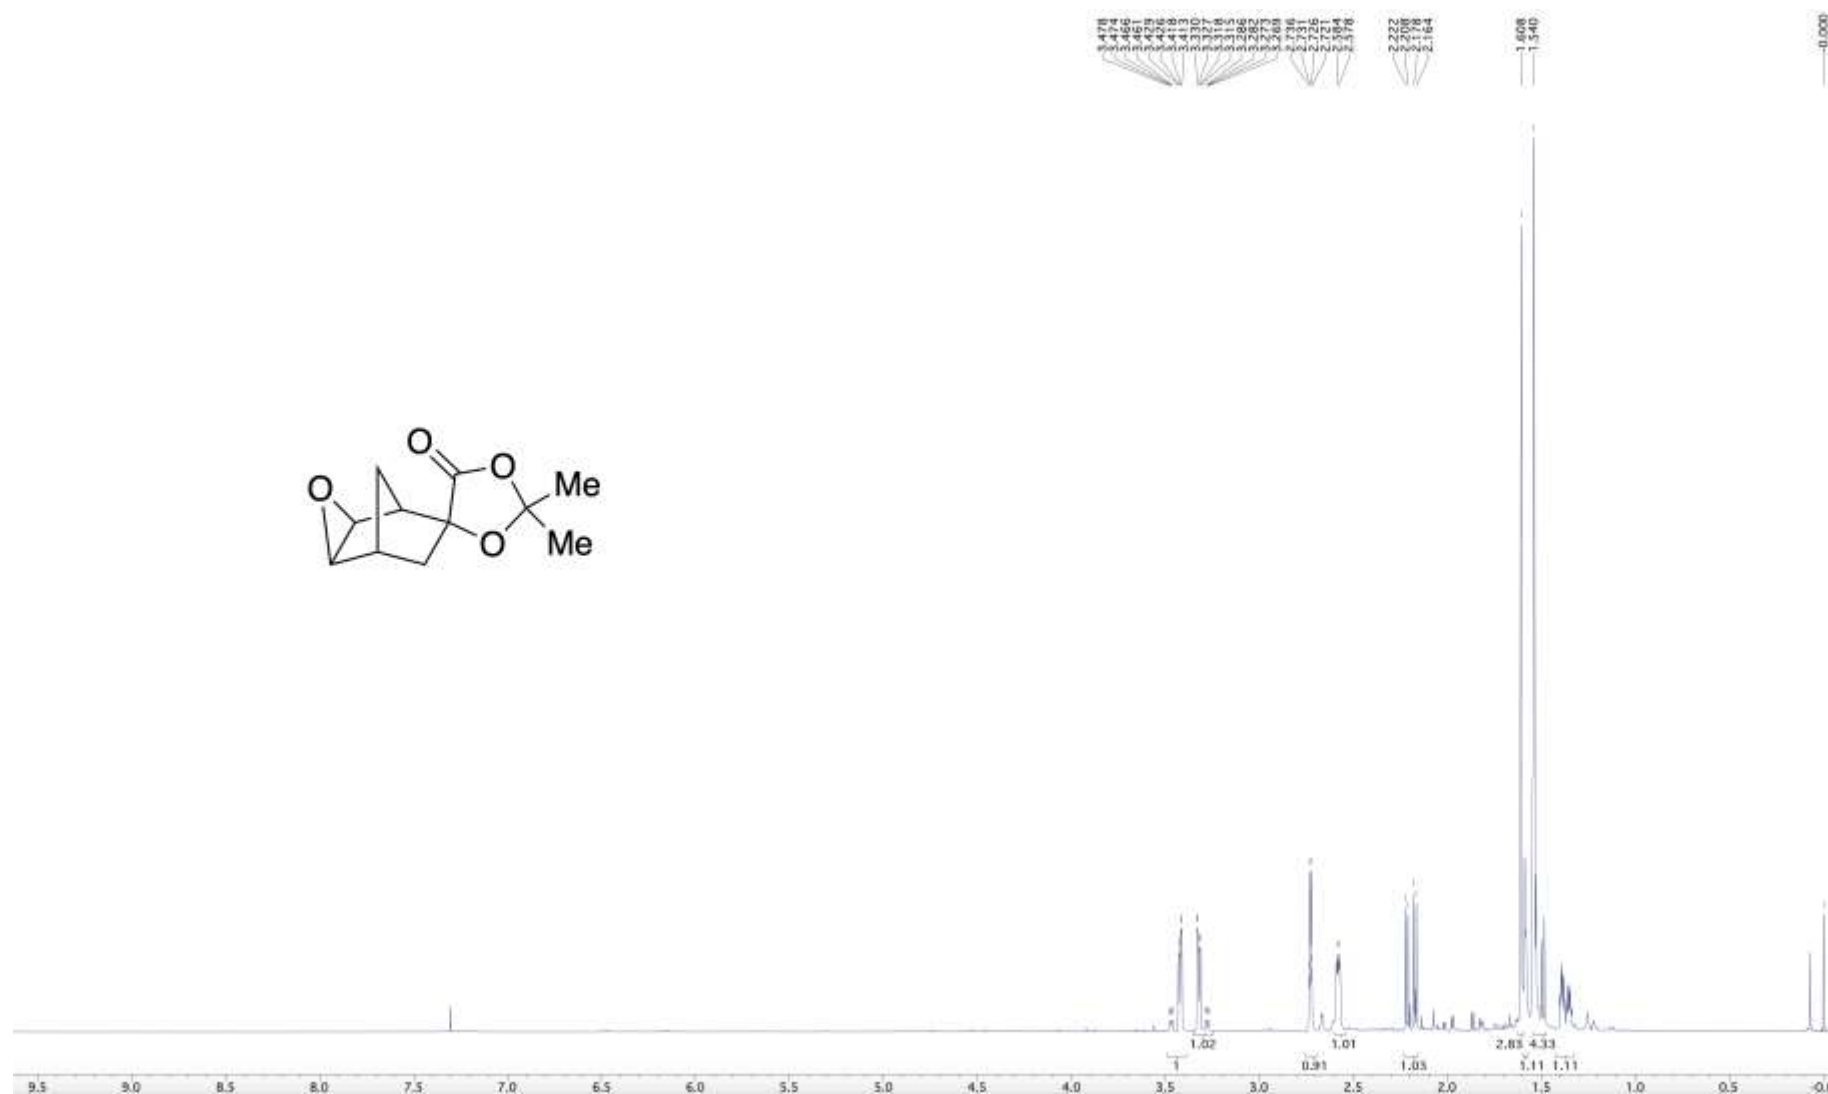

Figure S43. 75 MHz DEPTQ  $^{13}\text{C}$  NMR spectrum of **28**

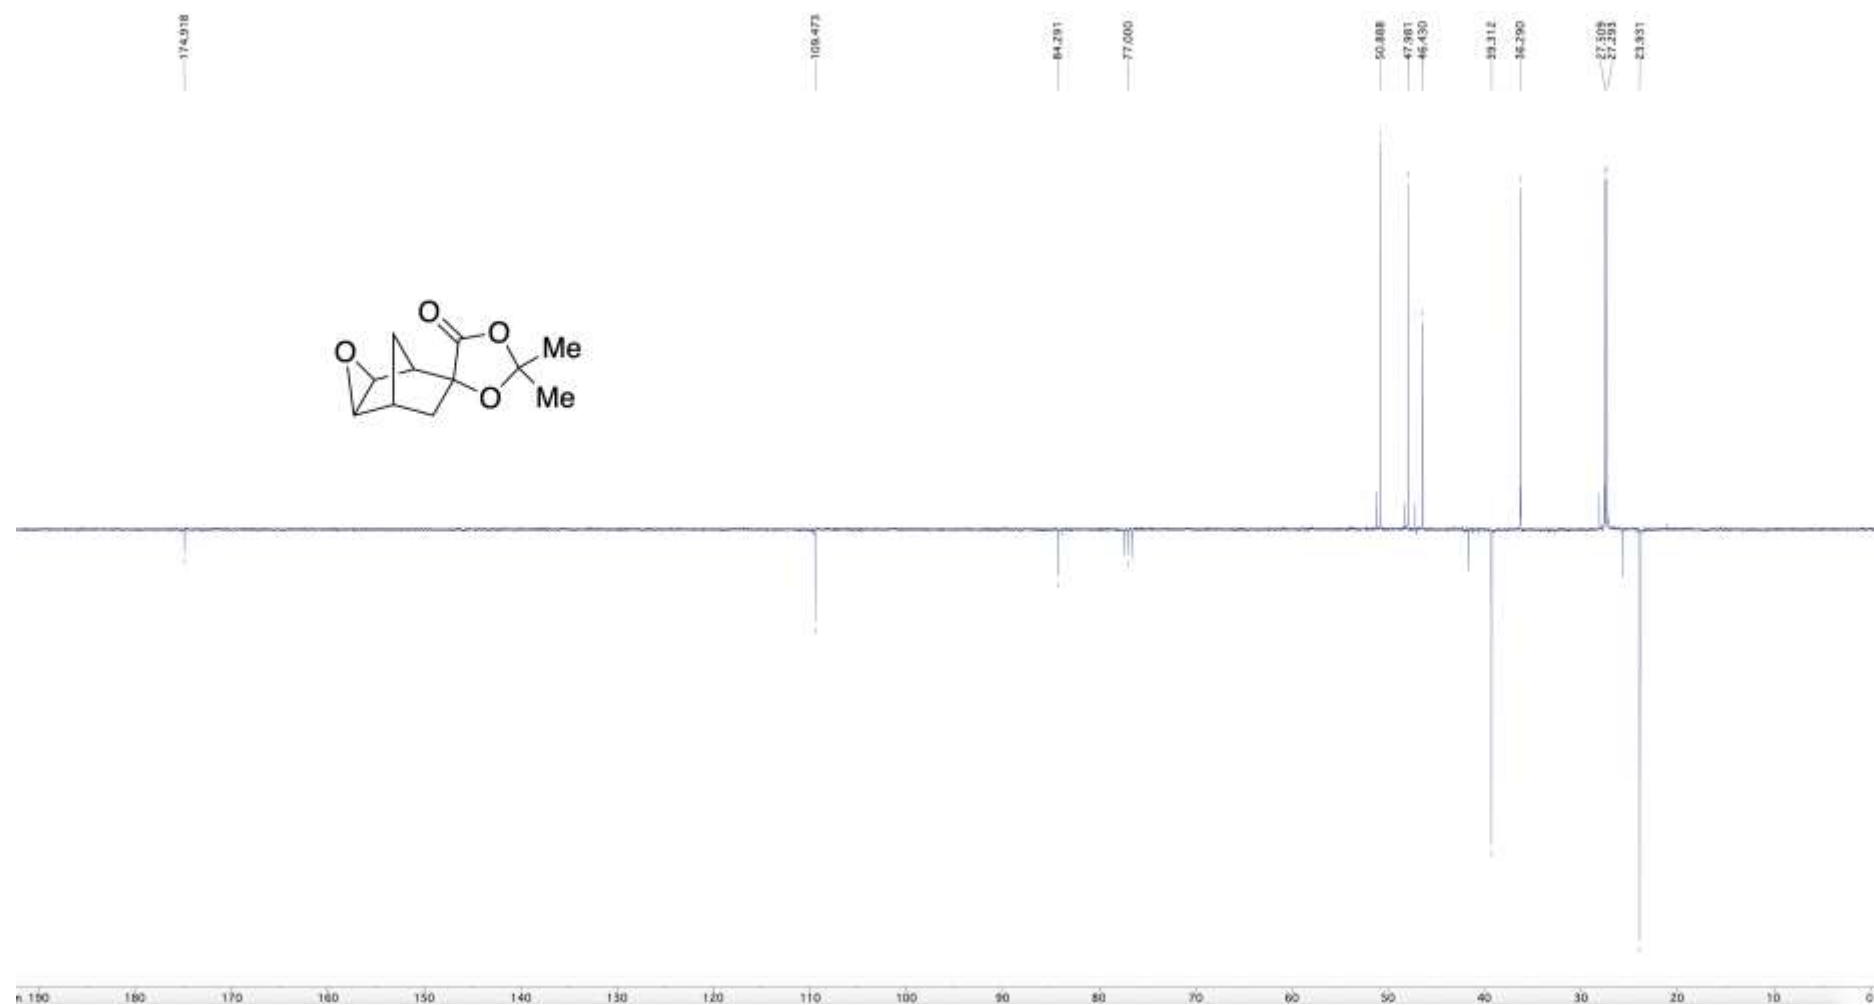

Figure S44. HRMS of 28

## Elemental Composition Report

### Single Mass Analysis

Tolerance = 20.0 PPM / DBE: min = -1.5, max = 40.0

Isotope cluster parameters: Separation = 1.0 Abundance = 1.0%

Monoisotopic Mass, Odd and Even Electron Ions

18 formula(e) evaluated with 1 results within limits (up to 8 closest results for each mass)

Lynn Power

University of St-Andrews  
School of Chemistry GCTOF

LAP172\_ci 177 (2.934) Cm (159:180-1:40)

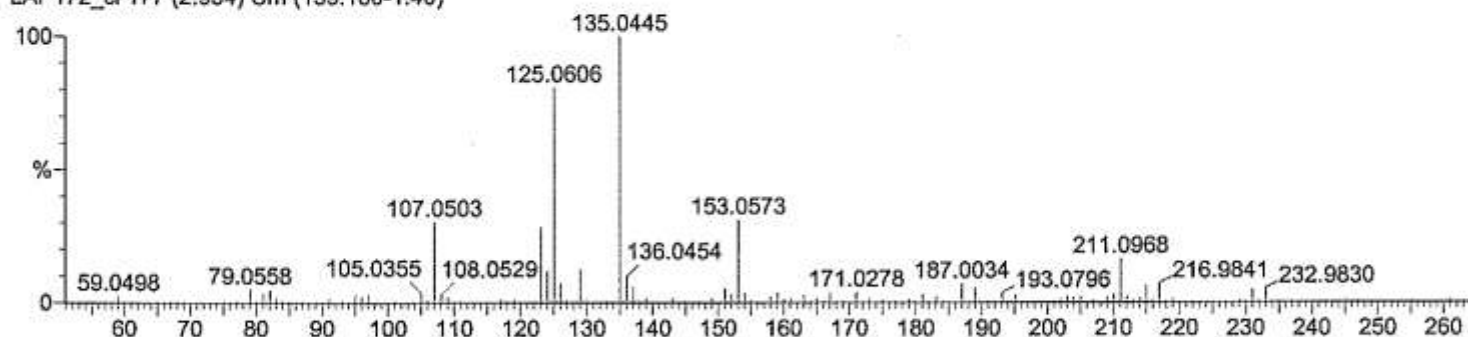

Minimum: -1.5  
Maximum: 200.0 20.0 40.0

| Mass     | Calc. Mass | mDa  | PPM  | DBE | Score | Formula    |
|----------|------------|------|------|-----|-------|------------|
| 211.0968 | 211.0970   | -0.2 | -1.1 | 4.5 | 1     | C11 H15 O4 |

Figure S45. 300 MHz  $^1\text{H}$  NMR spectrum of **29a**

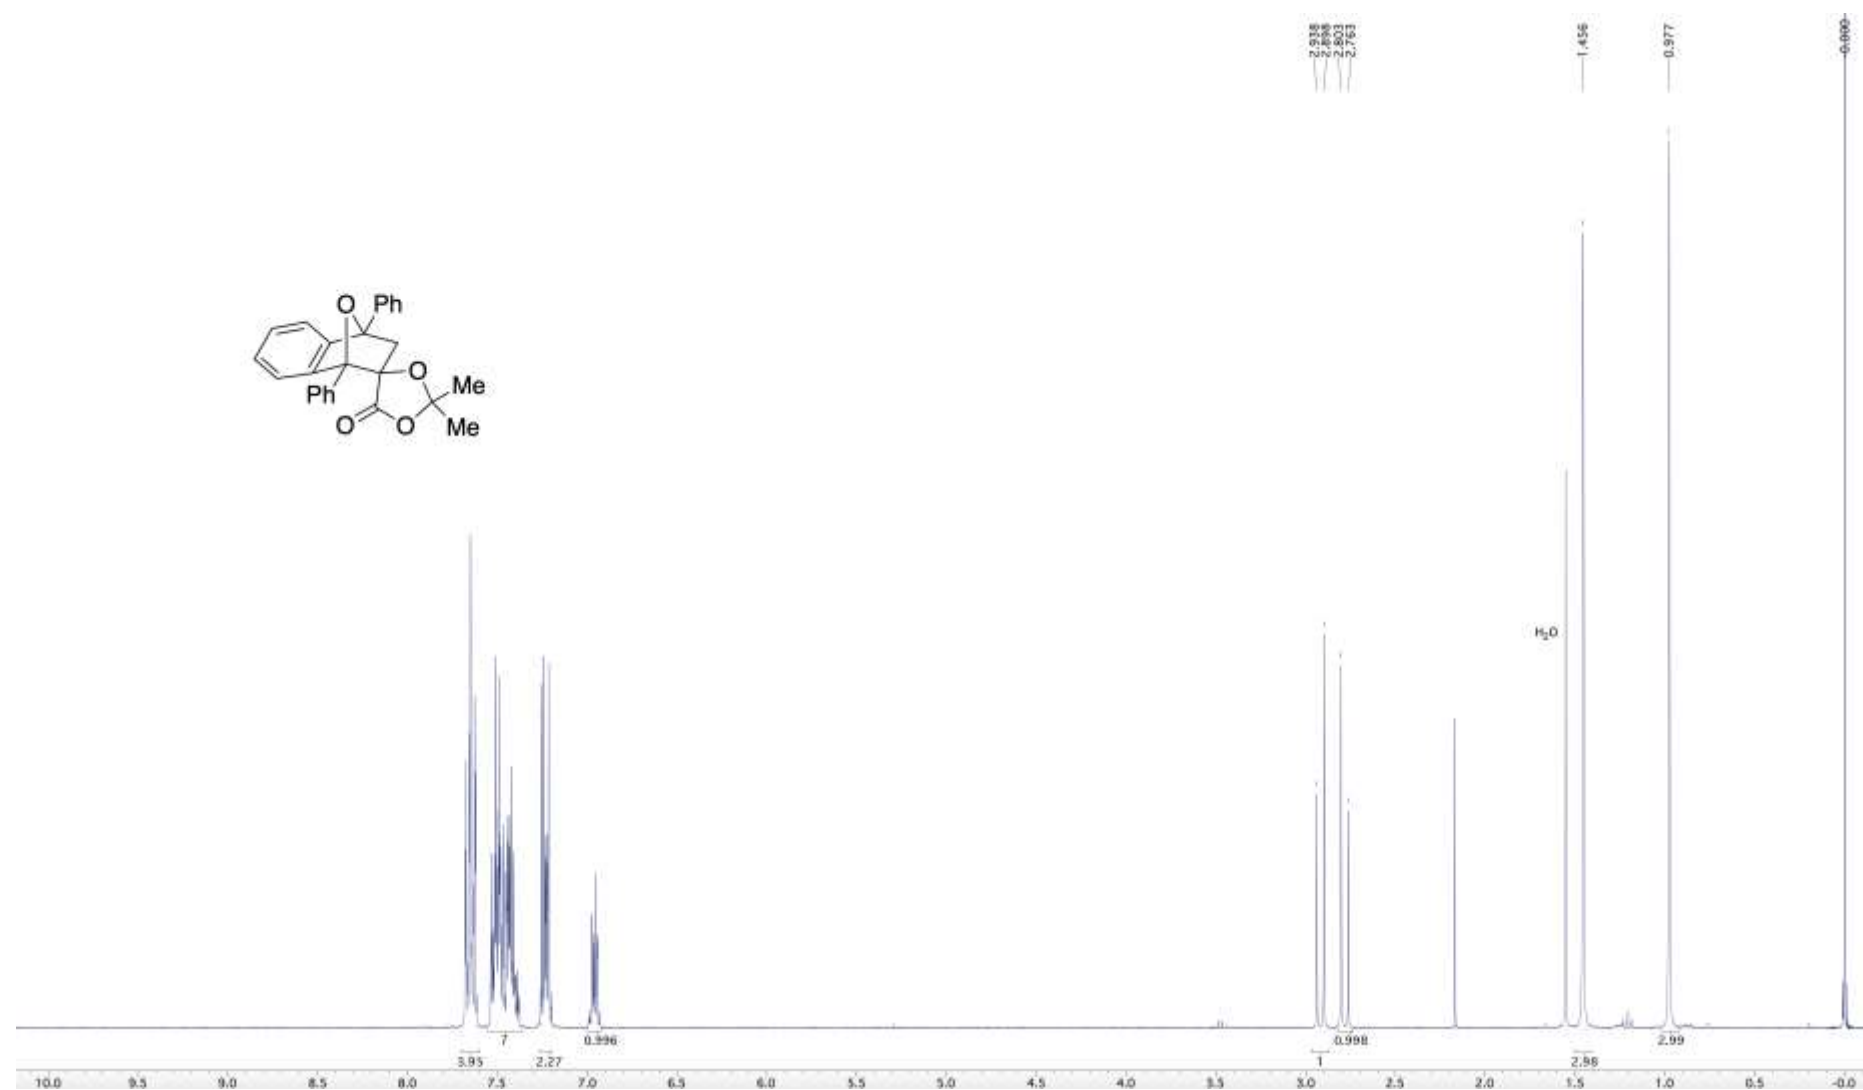

Figure S46. 75 MHz DEPTQ  $^{13}\text{C}$  NMR spectrum of **29a**

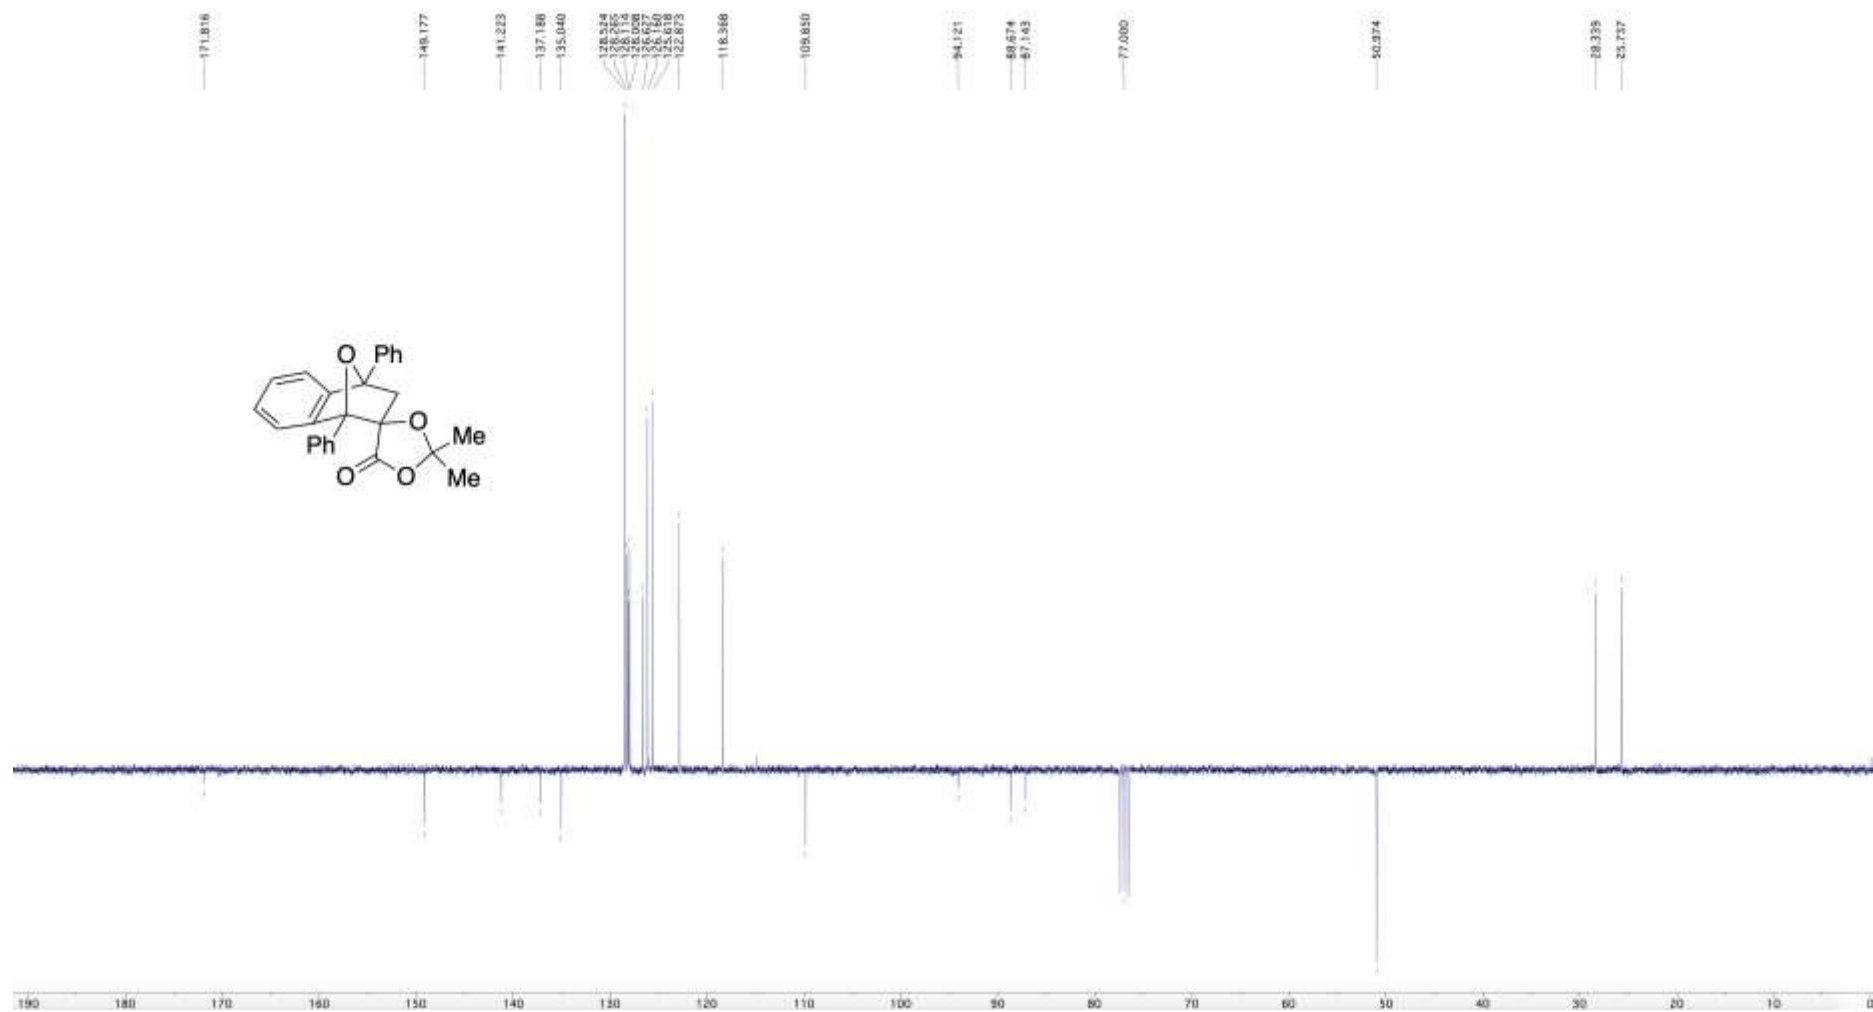

Figure S47. IR spectrum of **29a**

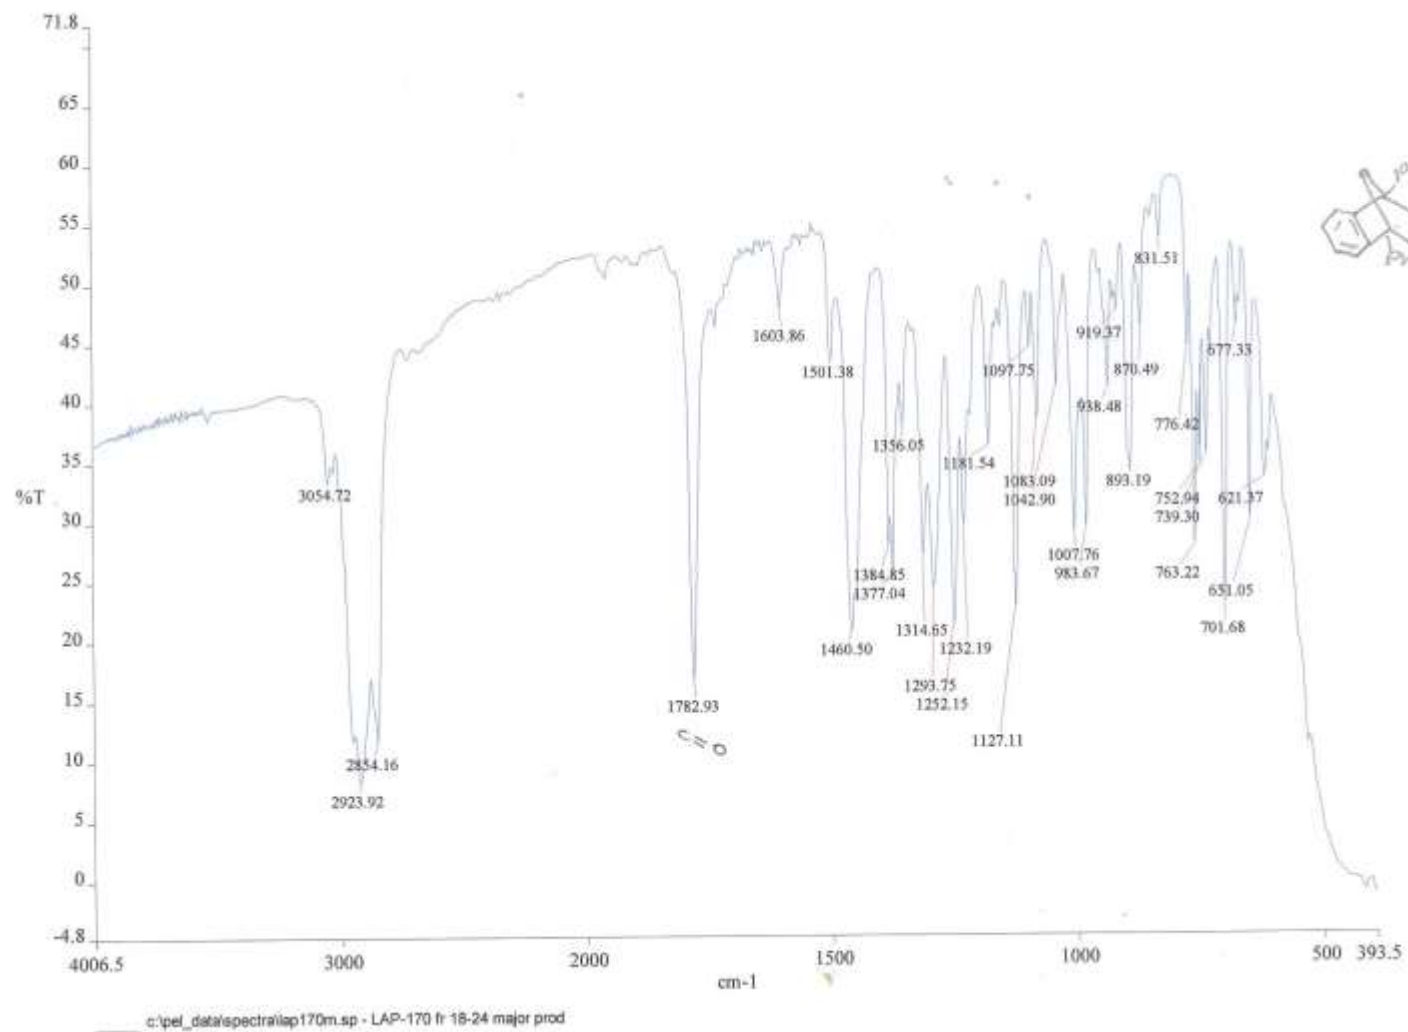



Figure S48. 300 MHz  $^1\text{H}$  NMR spectrum of **29b**

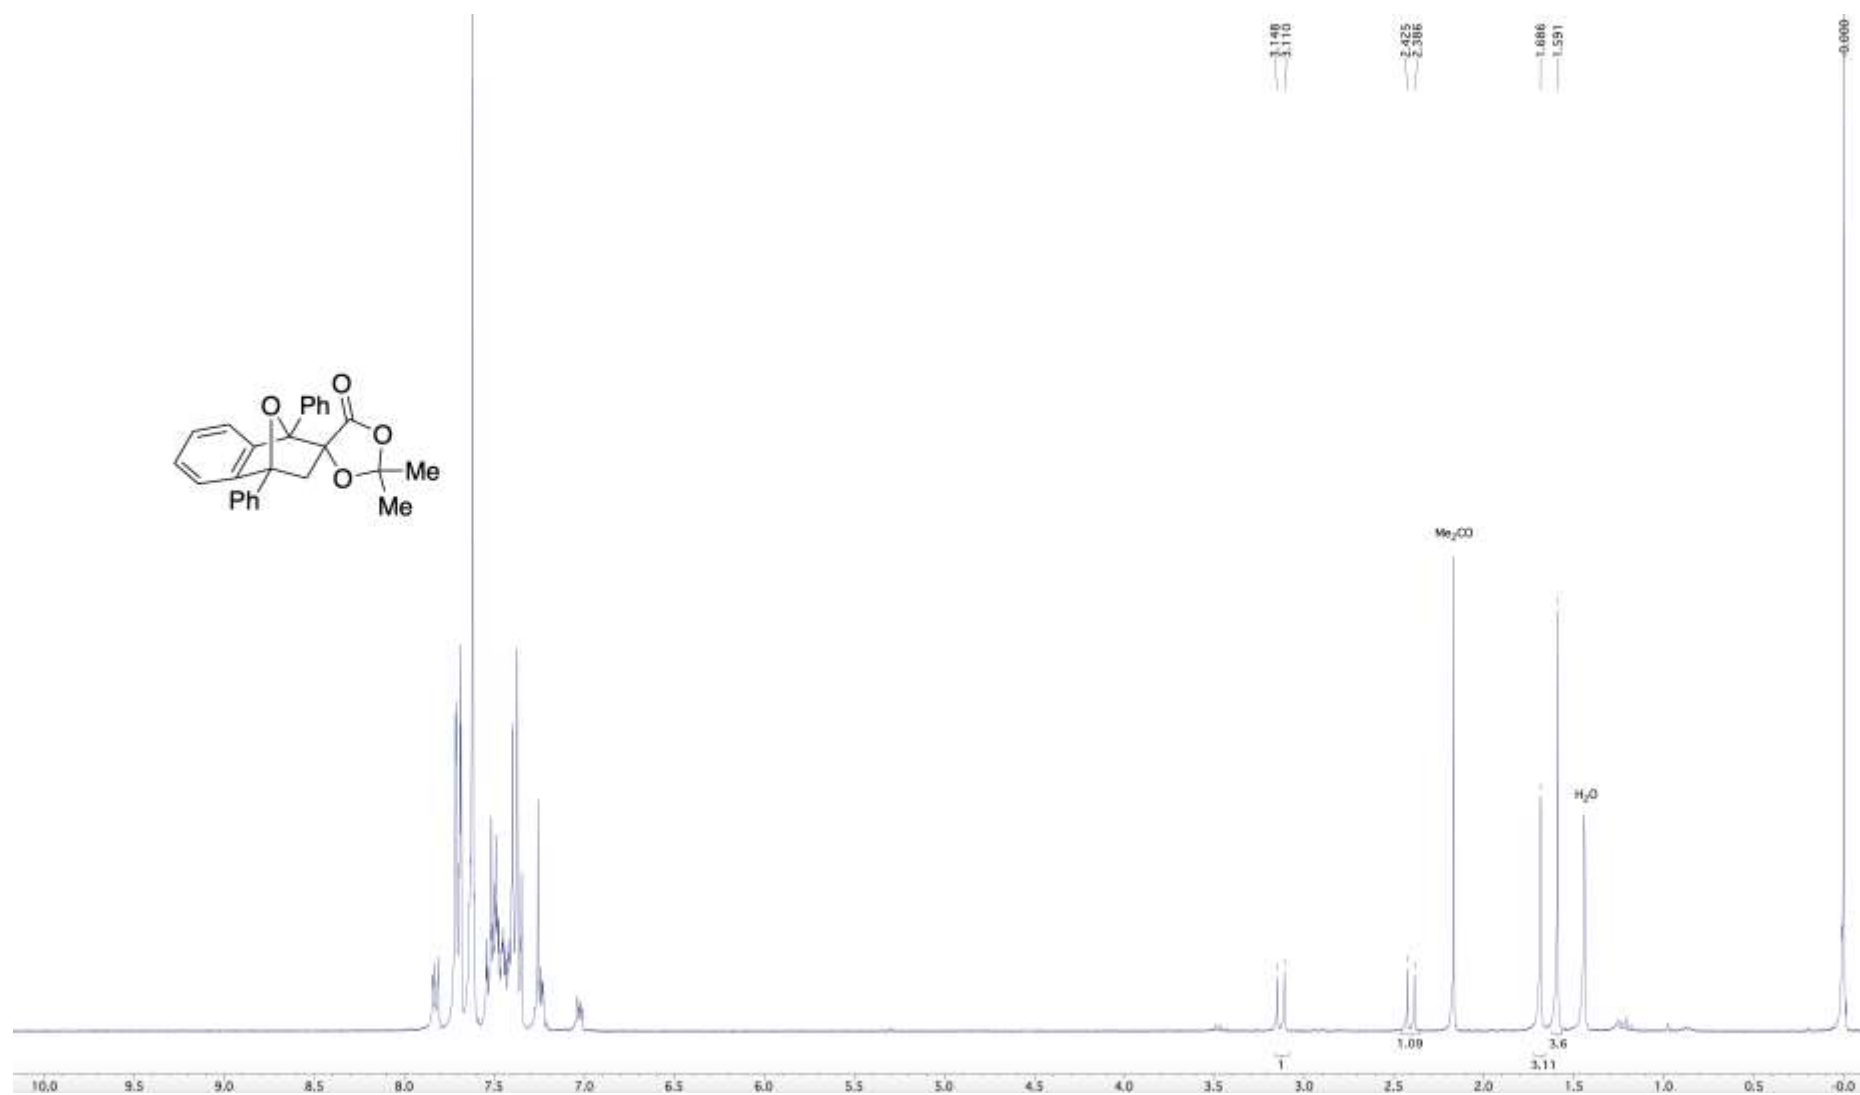

Figure S49. IR spectrum of **29b**

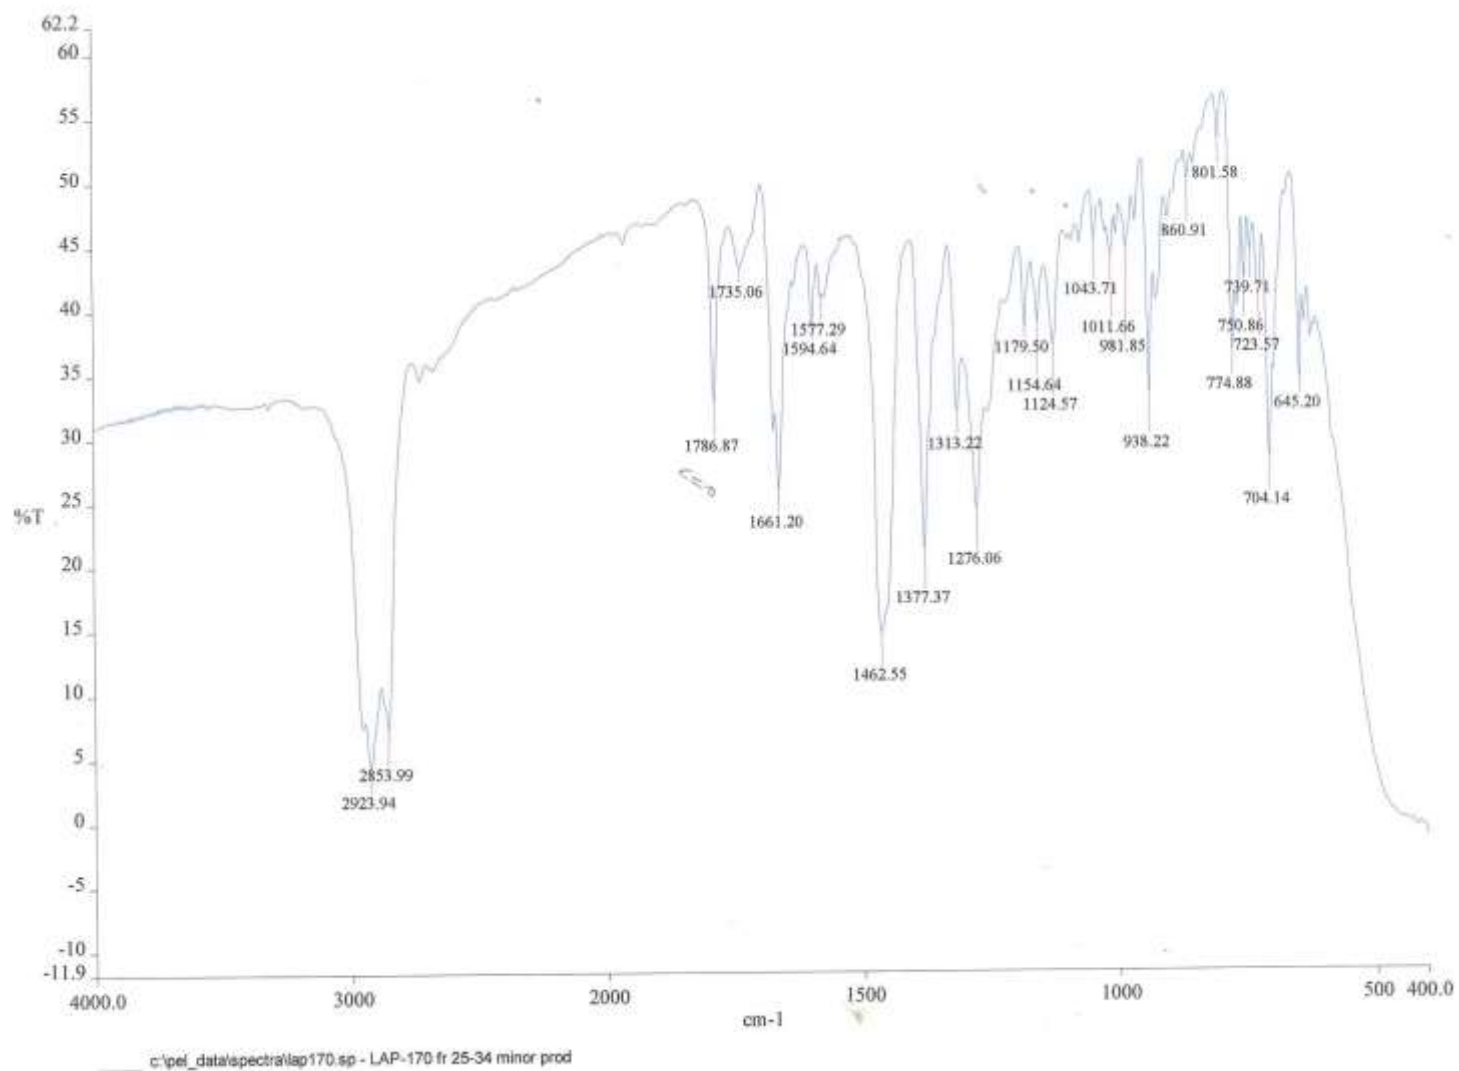

Supplement: s1 [file s1]
